# Supplementary material
Source: publisher figshare collection journal article supplement (https://brill.figshare.com/articles/dataset/_/12639104)
Supplement: Supplementary file 1 [file 1]

## Sheet: SNA_chrj_pr
SourcePersonID	TargetPersonID	SourceFamilyID	TargetFamilyID	Type	SourcePersonName	TargetPersonName	SourceFamilyName	TargetFamilyName	Relation
12010	11907	20446	20446	Undirected	林秋北	林波堂	林定邦家系	林定邦家系	hasAdoptedBrother
13224	13225	20839	20839	Undirected	蔣經國	蔣緯國	蔣介石家系	蔣介石家系	hasAdoptedBrother
11606	11776	20485	20485	Undirected	林博正	林攀龍	林獻堂家系	林獻堂家系	hasAdoptedFather
11849	12010	20446	20446	Undirected	林東星	林秋北	林定邦家系	林定邦家系	hasAdoptedFather
11892	11849	20446	20446	Undirected	林正義	林東星	林定邦家系	林定邦家系	hasAdoptedFather
11892	12153	20446	20446	Undirected	林正義	林資炯	林定邦家系	林定邦家系	hasAdoptedFather
12394	12376	20572	20572	Undirected	楊肇嘉	楊澄若	楊肇嘉家系	楊肇嘉家系	hasAdoptedFather
13225	13198	20839	20839	Undirected	蔣緯國	蔣介石	蔣介石家系	蔣介石家系	hasAdoptedFather
14363	13315	21172	20889	Undirected	顏絢美	許伯埏	顏雲年家系	許博允家系	hasAdoptedFather
10024	10033	21206	21206	Undirected	丁淳兒	丁逸民	鹿港丁家	鹿港丁家	hasBrother
10024	10034	21206	21206	Undirected	丁淳兒	丁逸郎	鹿港丁家	鹿港丁家	hasBrother
10024	10035	21206	21206	Undirected	丁淳兒	丁逸龍	鹿港丁家	鹿港丁家	hasBrother
12680	12678	20689	20689	Undirected	王文淵	王文堯	王永慶家系	王永慶家系	hasBrother
12680	12682	20689	20689	Undirected	王文淵	王文潮	王永慶家系	王永慶家系	hasBrother
13332	13329	20889	20889	Undirected	許嘉淵	許嘉佑	許博允家系	許博允家系	hasBrother
13332	13330	20889	20889	Undirected	許嘉淵	許嘉倫	許博允家系	許博允家系	hasBrother
13332	13331	20889	20889	Undirected	許嘉淵	許嘉宏	許博允家系	許博允家系	hasBrother
13556	13555	20961	20961	Undirected	趙令民	趙令平	趙清雲家族	趙清雲家族	hasBrother
13556	13557	20961	20961	Undirected	趙令民	趙令熙	趙清雲家族	趙清雲家族	hasBrother
13556	13558	20961	20961	Undirected	趙令民	趙令達	趙清雲家族	趙清雲家族	hasBrother
13668	13667	20974	20974	Undirected	邱皙穎	邱皙毅	邱創煥家族	邱創煥家族	hasBrother
14224	13958	21047	21047	Undirected	陳雅馨	陳建凱	陳中和家族	陳中和家族	hasBrother
14224	13964	21047	21047	Undirected	陳雅馨	陳建榮	陳中和家族	陳中和家族	hasBrother
10004	10007	21206	21206	Undirected	丁一天	丁仲翹	鹿港丁家	鹿港丁家	hasBrother
10004	10008	21206	21206	Undirected	丁一天	丁伯雄	鹿港丁家	鹿港丁家	hasBrother
10004	10009	21206	21206	Undirected	丁一天	丁叔豪	鹿港丁家	鹿港丁家	hasBrother
10004	10016	21206	21206	Undirected	丁一天	丁幼如	鹿港丁家	鹿港丁家	hasBrother
10004	10032	21206	21206	Undirected	丁一天	丁若夢	鹿港丁家	鹿港丁家	hasBrother
10007	10008	21206	21206	Undirected	丁仲翹	丁伯雄	鹿港丁家	鹿港丁家	hasBrother
10007	10009	21206	21206	Undirected	丁仲翹	丁叔豪	鹿港丁家	鹿港丁家	hasBrother
10007	10016	21206	21206	Undirected	丁仲翹	丁幼如	鹿港丁家	鹿港丁家	hasBrother
10007	10032	21206	21206	Undirected	丁仲翹	丁若夢	鹿港丁家	鹿港丁家	hasBrother
10008	10009	21206	21206	Undirected	丁伯雄	丁叔豪	鹿港丁家	鹿港丁家	hasBrother
10008	10016	21206	21206	Undirected	丁伯雄	丁幼如	鹿港丁家	鹿港丁家	hasBrother
10008	10032	21206	21206	Undirected	丁伯雄	丁若夢	鹿港丁家	鹿港丁家	hasBrother
10009	10016	21206	21206	Undirected	丁叔豪	丁幼如	鹿港丁家	鹿港丁家	hasBrother
10009	10032	21206	21206	Undirected	丁叔豪	丁若夢	鹿港丁家	鹿港丁家	hasBrother
10011	10012	20004	20004	Undirected	丁善玖	丁善理	丁唯農家族	丁唯農家族	hasBrother
10011	10013	20004	20004	Undirected	丁善玖	丁善璽	丁唯農家族	丁唯農家族	hasBrother
10012	10013	20004	20004	Undirected	丁善理	丁善璽	丁唯農家族	丁唯農家族	hasBrother
10016	10032	21206	21206	Undirected	丁幼如	丁若夢	鹿港丁家	鹿港丁家	hasBrother
10017	10019	20004	20004	Undirected	丁廣伃	丁廣欽	丁唯農家族	丁唯農家族	hasBrother
10017	10020	20004	20004	Undirected	丁廣伃	丁廣鋐	丁唯農家族	丁唯農家族	hasBrother
10018	10019	20004	20004	Undirected	丁廣儀	丁廣欽	丁唯農家族	丁唯農家族	hasBrother
10018	10020	20004	20004	Undirected	丁廣儀	丁廣鋐	丁唯農家族	丁唯農家族	hasBrother
10019	10020	20004	20004	Undirected	丁廣欽	丁廣鋐	丁唯農家族	丁唯農家族	hasBrother
10025	10033	21206	21206	Undirected	丁玲兒	丁逸民	鹿港丁家	鹿港丁家	hasBrother
10025	10034	21206	21206	Undirected	丁玲兒	丁逸郎	鹿港丁家	鹿港丁家	hasBrother
10025	10035	21206	21206	Undirected	丁玲兒	丁逸龍	鹿港丁家	鹿港丁家	hasBrother
10026	10027	21206	21206	Undirected	丁琴英	丁瑞圖	鹿港丁家	鹿港丁家	hasBrother
10026	10028	21206	21206	Undirected	丁琴英	丁瑞彬	鹿港丁家	鹿港丁家	hasBrother
10026	10029	21206	21206	Undirected	丁琴英	丁瑞鉠	鹿港丁家	鹿港丁家	hasBrother
10026	10030	21206	21206	Undirected	丁琴英	丁瑞魚	鹿港丁家	鹿港丁家	hasBrother
10027	10028	21206	21206	Undirected	丁瑞圖	丁瑞彬	鹿港丁家	鹿港丁家	hasBrother
10027	10029	21206	21206	Undirected	丁瑞圖	丁瑞鉠	鹿港丁家	鹿港丁家	hasBrother
10027	10030	21206	21206	Undirected	丁瑞圖	丁瑞魚	鹿港丁家	鹿港丁家	hasBrother
10028	10029	21206	21206	Undirected	丁瑞彬	丁瑞鉠	鹿港丁家	鹿港丁家	hasBrother
10028	10030	21206	21206	Undirected	丁瑞彬	丁瑞魚	鹿港丁家	鹿港丁家	hasBrother
10029	10030	21206	21206	Undirected	丁瑞鉠	丁瑞魚	鹿港丁家	鹿港丁家	hasBrother
10031	10004	21206	21206	Undirected	丁秀卿	丁一天	鹿港丁家	鹿港丁家	hasBrother
10031	10007	21206	21206	Undirected	丁秀卿	丁仲翹	鹿港丁家	鹿港丁家	hasBrother
10031	10008	21206	21206	Undirected	丁秀卿	丁伯雄	鹿港丁家	鹿港丁家	hasBrother
10031	10009	21206	21206	Undirected	丁秀卿	丁叔豪	鹿港丁家	鹿港丁家	hasBrother
10031	10016	21206	21206	Undirected	丁秀卿	丁幼如	鹿港丁家	鹿港丁家	hasBrother
10031	10032	21206	21206	Undirected	丁秀卿	丁若夢	鹿港丁家	鹿港丁家	hasBrother
10033	10034	21206	21206	Undirected	丁逸民	丁逸郎	鹿港丁家	鹿港丁家	hasBrother
10033	10035	21206	21206	Undirected	丁逸民	丁逸龍	鹿港丁家	鹿港丁家	hasBrother
10034	10035	21206	21206	Undirected	丁逸郎	丁逸龍	鹿港丁家	鹿港丁家	hasBrother
10036	10004	21206	21206	Undirected	丁采芬	丁一天	鹿港丁家	鹿港丁家	hasBrother
10036	10007	21206	21206	Undirected	丁采芬	丁仲翹	鹿港丁家	鹿港丁家	hasBrother
10036	10008	21206	21206	Undirected	丁采芬	丁伯雄	鹿港丁家	鹿港丁家	hasBrother
10036	10009	21206	21206	Undirected	丁采芬	丁叔豪	鹿港丁家	鹿港丁家	hasBrother
10036	10016	21206	21206	Undirected	丁采芬	丁幼如	鹿港丁家	鹿港丁家	hasBrother
10036	10032	21206	21206	Undirected	丁采芬	丁若夢	鹿港丁家	鹿港丁家	hasBrother
10037	10004	21206	21206	Undirected	丁采華	丁一天	鹿港丁家	鹿港丁家	hasBrother
10037	10007	21206	21206	Undirected	丁采華	丁仲翹	鹿港丁家	鹿港丁家	hasBrother
10037	10008	21206	21206	Undirected	丁采華	丁伯雄	鹿港丁家	鹿港丁家	hasBrother
10037	10009	21206	21206	Undirected	丁采華	丁叔豪	鹿港丁家	鹿港丁家	hasBrother
10037	10016	21206	21206	Undirected	丁采華	丁幼如	鹿港丁家	鹿港丁家	hasBrother
10037	10032	21206	21206	Undirected	丁采華	丁若夢	鹿港丁家	鹿港丁家	hasBrother
10038	10004	21206	21206	Undirected	丁采蘋	丁一天	鹿港丁家	鹿港丁家	hasBrother
10038	10007	21206	21206	Undirected	丁采蘋	丁仲翹	鹿港丁家	鹿港丁家	hasBrother
10038	10008	21206	21206	Undirected	丁采蘋	丁伯雄	鹿港丁家	鹿港丁家	hasBrother
10038	10009	21206	21206	Undirected	丁采蘋	丁叔豪	鹿港丁家	鹿港丁家	hasBrother
10038	10016	21206	21206	Undirected	丁采蘋	丁幼如	鹿港丁家	鹿港丁家	hasBrother
10038	10032	21206	21206	Undirected	丁采蘋	丁若夢	鹿港丁家	鹿港丁家	hasBrother
10039	10004	21206	21206	Undirected	丁采靜	丁一天	鹿港丁家	鹿港丁家	hasBrother
10039	10007	21206	21206	Undirected	丁采靜	丁仲翹	鹿港丁家	鹿港丁家	hasBrother
10039	10008	21206	21206	Undirected	丁采靜	丁伯雄	鹿港丁家	鹿港丁家	hasBrother
10039	10009	21206	21206	Undirected	丁采靜	丁叔豪	鹿港丁家	鹿港丁家	hasBrother
10039	10016	21206	21206	Undirected	丁采靜	丁幼如	鹿港丁家	鹿港丁家	hasBrother
10039	10032	21206	21206	Undirected	丁采靜	丁若夢	鹿港丁家	鹿港丁家	hasBrother
10040	10033	21206	21206	Undirected	丁鈴兒	丁逸民	鹿港丁家	鹿港丁家	hasBrother
10040	10034	21206	21206	Undirected	丁鈴兒	丁逸郎	鹿港丁家	鹿港丁家	hasBrother
10040	10035	21206	21206	Undirected	丁鈴兒	丁逸龍	鹿港丁家	鹿港丁家	hasBrother
10043	10047	20009	20009	Undirected	丘如秀	丘廷亮	丘健賓家族	丘健賓家族	hasBrother
10043	10048	20009	20009	Undirected	丘如秀	丘廷德	丘健賓家族	丘健賓家族	hasBrother
10043	10049	20009	20009	Undirected	丘如秀	丘廷明	丘健賓家族	丘健賓家族	hasBrother
10044	10047	20009	20009	Undirected	丘如荔	丘廷亮	丘健賓家族	丘健賓家族	hasBrother
10044	10048	20009	20009	Undirected	丘如荔	丘廷德	丘健賓家族	丘健賓家族	hasBrother
10044	10049	20009	20009	Undirected	丘如荔	丘廷明	丘健賓家族	丘健賓家族	hasBrother
10045	10047	20009	20009	Undirected	丘如華	丘廷亮	丘健賓家族	丘健賓家族	hasBrother
10045	10048	20009	20009	Undirected	丘如華	丘廷德	丘健賓家族	丘健賓家族	hasBrother
10045	10049	20009	20009	Undirected	丘如華	丘廷明	丘健賓家族	丘健賓家族	hasBrother
10046	10047	20009	20009	Undirected	丘如雪	丘廷亮	丘健賓家族	丘健賓家族	hasBrother
10046	10048	20009	20009	Undirected	丘如雪	丘廷德	丘健賓家族	丘健賓家族	hasBrother
10046	10049	20009	20009	Undirected	丘如雪	丘廷明	丘健賓家族	丘健賓家族	hasBrother
10047	10048	20009	20009	Undirected	丘廷亮	丘廷德	丘健賓家族	丘健賓家族	hasBrother
10047	10049	20009	20009	Undirected	丘廷亮	丘廷明	丘健賓家族	丘健賓家族	hasBrother
10048	10049	20009	20009	Undirected	丘廷德	丘廷明	丘健賓家族	丘健賓家族	hasBrother
10050	10051	20009	20009	Undirected	丘秉敏	丘秉煜	丘健賓家族	丘健賓家族	hasBrother
10059	10074	20024	20024	Undirected	何京樺	何宗達	何義家系	何義家系	hasBrother
10059	10075	20024	20024	Undirected	何京樺	何宗龍	何義家系	何義家系	hasBrother
10060	10085	20016	20016	Undirected	何佩娟	何星輝	何傳家系	何傳家系	hasBrother
10061	10085	20016	20016	Undirected	何佩珊	何星輝	何傳家系	何傳家系	hasBrother
10062	10085	20016	20016	Undirected	何佩珍	何星輝	何傳家系	何傳家系	hasBrother
10063	10090	20016	20020	Undirected	何傳	何永	何傳家系	何永家系	hasBrother
10063	10112	20016	20024	Undirected	何傳	何義	何傳家系	何義家系	hasBrother
10065	10071	20020	20020	Undirected	何冠德	何威德	何永家系	何永家系	hasBrother
10065	10118	20020	20020	Undirected	何冠德	何重德	何永家系	何永家系	hasBrother
10066	10067	20016	20016	Undirected	何培庭	何壽山	何傳家系	何傳家系	hasBrother
10066	10068	20016	20016	Undirected	何培庭	何壽川	何傳家系	何傳家系	hasBrother
10067	10068	20016	20016	Undirected	何壽山	何壽川	何傳家系	何傳家系	hasBrother
10069	10070	20016	20016	Undirected	何奕佳	何奕達	何傳家系	何傳家系	hasBrother
10071	10118	20020	20020	Undirected	何威德	何重德	何永家系	何永家系	hasBrother
10072	10074	20024	20024	Undirected	何季樺	何宗達	何義家系	何義家系	hasBrother
10072	10075	20024	20024	Undirected	何季樺	何宗龍	何義家系	何義家系	hasBrother
10074	10075	20024	20024	Undirected	何宗達	何宗龍	何義家系	何義家系	hasBrother
10076	10083	20024	20024	Undirected	何建廷	何政廷	何義家系	何義家系	hasBrother
10076	10084	20024	20024	Undirected	何建廷	何敏廷	何義家系	何義家系	hasBrother
10076	10086	20024	20024	Undirected	何建廷	何曜廷	何義家系	何義家系	hasBrother
10076	10088	20024	20024	Undirected	何建廷	何榮庭	何義家系	何義家系	hasBrother
10078	10087	20020	20020	Undirected	何惠珍	何森庭	何永家系	何永家系	hasBrother
10079	10080	20019	20019	Undirected	何應楨	何應欽	何應欽家系	何應欽家系	hasBrother
10079	10081	20019	20019	Undirected	何應楨	何應祿	何應欽家系	何應欽家系	hasBrother
10079	10105	20019	20019	Undirected	何應楨	何縱炎	何應欽家系	何應欽家系	hasBrother
10079	10116	20019	20019	Undirected	何應楨	何輯五	何應欽家系	何應欽家系	hasBrother
10080	10081	20019	20019	Undirected	何應欽	何應祿	何應欽家系	何應欽家系	hasBrother
10080	10105	20019	20019	Undirected	何應欽	何縱炎	何應欽家系	何應欽家系	hasBrother
10080	10116	20019	20019	Undirected	何應欽	何輯五	何應欽家系	何應欽家系	hasBrother
10082	10066	20016	20016	Undirected	何換治	何培庭	何傳家系	何傳家系	hasBrother
10082	10067	20016	20016	Undirected	何換治	何壽山	何傳家系	何傳家系	hasBrother
10082	10068	20016	20016	Undirected	何換治	何壽川	何傳家系	何傳家系	hasBrother
10083	10084	20024	20024	Undirected	何政廷	何敏廷	何義家系	何義家系	hasBrother
10083	10086	20024	20024	Undirected	何政廷	何曜廷	何義家系	何義家系	hasBrother
10083	10088	20024	20024	Undirected	何政廷	何榮庭	何義家系	何義家系	hasBrother
10084	10086	20024	20024	Undirected	何敏廷	何曜廷	何義家系	何義家系	hasBrother
10084	10088	20024	20024	Undirected	何敏廷	何榮庭	何義家系	何義家系	hasBrother
10086	10088	20024	20024	Undirected	何曜廷	何榮庭	何義家系	何義家系	hasBrother
10090	10112	20020	20024	Undirected	何永	何義	何永家系	何義家系	hasBrother
10095	10065	20020	20020	Undirected	何祈瑩	何冠德	何永家系	何永家系	hasBrother
10095	10071	20020	20020	Undirected	何祈瑩	何威德	何永家系	何永家系	hasBrother
10095	10118	20020	20020	Undirected	何祈瑩	何重德	何永家系	何永家系	hasBrother
10096	10097	20019	20019	Undirected	何紹弇	何紹徵	何應欽家系	何應欽家系	hasBrother
10096	10098	20019	20019	Undirected	何紹弇	何紹源	何應欽家系	何應欽家系	hasBrother
10096	10099	20019	20019	Undirected	何紹弇	何紹牧	何應欽家系	何應欽家系	hasBrother
10096	10104	20019	20019	Undirected	何紹弇	何紹雄	何應欽家系	何應欽家系	hasBrother
10097	10098	20019	20019	Undirected	何紹徵	何紹源	何應欽家系	何應欽家系	hasBrother
10097	10099	20019	20019	Undirected	何紹徵	何紹牧	何應欽家系	何應欽家系	hasBrother
10097	10104	20019	20019	Undirected	何紹徵	何紹雄	何應欽家系	何應欽家系	hasBrother
10098	10099	20019	20019	Undirected	何紹源	何紹牧	何應欽家系	何應欽家系	hasBrother
10098	10104	20019	20019	Undirected	何紹源	何紹雄	何應欽家系	何應欽家系	hasBrother
10099	10104	20019	20019	Undirected	何紹牧	何紹雄	何應欽家系	何應欽家系	hasBrother
10100	10096	20019	20019	Undirected	何紹珣	何紹弇	何應欽家系	何應欽家系	hasBrother
10100	10097	20019	20019	Undirected	何紹珣	何紹徵	何應欽家系	何應欽家系	hasBrother
10100	10098	20019	20019	Undirected	何紹珣	何紹源	何應欽家系	何應欽家系	hasBrother
10100	10099	20019	20019	Undirected	何紹珣	何紹牧	何應欽家系	何應欽家系	hasBrother
10100	10104	20019	20019	Undirected	何紹珣	何紹雄	何應欽家系	何應欽家系	hasBrother
10101	10096	20019	20019	Undirected	何紹珪	何紹弇	何應欽家系	何應欽家系	hasBrother
10101	10097	20019	20019	Undirected	何紹珪	何紹徵	何應欽家系	何應欽家系	hasBrother
10101	10098	20019	20019	Undirected	何紹珪	何紹源	何應欽家系	何應欽家系	hasBrother
10101	10099	20019	20019	Undirected	何紹珪	何紹牧	何應欽家系	何應欽家系	hasBrother
10101	10104	20019	20019	Undirected	何紹珪	何紹雄	何應欽家系	何應欽家系	hasBrother
10102	10096	20019	20019	Undirected	何紹瑤	何紹弇	何應欽家系	何應欽家系	hasBrother
10102	10097	20019	20019	Undirected	何紹瑤	何紹徵	何應欽家系	何應欽家系	hasBrother
10102	10098	20019	20019	Undirected	何紹瑤	何紹源	何應欽家系	何應欽家系	hasBrother
10102	10099	20019	20019	Undirected	何紹瑤	何紹牧	何應欽家系	何應欽家系	hasBrother
10102	10104	20019	20019	Undirected	何紹瑤	何紹雄	何應欽家系	何應欽家系	hasBrother
10103	10096	20019	20019	Undirected	何紹璉	何紹弇	何應欽家系	何應欽家系	hasBrother
10103	10097	20019	20019	Undirected	何紹璉	何紹徵	何應欽家系	何應欽家系	hasBrother
10103	10098	20019	20019	Undirected	何紹璉	何紹源	何應欽家系	何應欽家系	hasBrother
10103	10099	20019	20019	Undirected	何紹璉	何紹牧	何應欽家系	何應欽家系	hasBrother
10103	10104	20019	20019	Undirected	何紹璉	何紹雄	何應欽家系	何應欽家系	hasBrother
10105	10081	20019	20019	Undirected	何縱炎	何應祿	何應欽家系	何應欽家系	hasBrother
10105	10116	20019	20019	Undirected	何縱炎	何輯五	何應欽家系	何應欽家系	hasBrother
10107	10076	20024	20024	Undirected	何美慧	何建廷	何義家系	何義家系	hasBrother
10107	10083	20024	20024	Undirected	何美慧	何政廷	何義家系	何義家系	hasBrother
10107	10084	20024	20024	Undirected	何美慧	何敏廷	何義家系	何義家系	hasBrother
10107	10086	20024	20024	Undirected	何美慧	何曜廷	何義家系	何義家系	hasBrother
10107	10088	20024	20024	Undirected	何美慧	何榮庭	何義家系	何義家系	hasBrother
10108	10066	20016	20016	Undirected	何美慶	何培庭	何傳家系	何傳家系	hasBrother
10108	10067	20016	20016	Undirected	何美慶	何壽山	何傳家系	何傳家系	hasBrother
10108	10068	20016	20016	Undirected	何美慶	何壽川	何傳家系	何傳家系	hasBrother
10109	10066	20016	20016	Undirected	何美昌	何培庭	何傳家系	何傳家系	hasBrother
10109	10067	20016	20016	Undirected	何美昌	何壽山	何傳家系	何傳家系	hasBrother
10109	10068	20016	20016	Undirected	何美昌	何壽川	何傳家系	何傳家系	hasBrother
10110	10066	20016	20016	Undirected	何美育	何培庭	何傳家系	何傳家系	hasBrother
10110	10067	20016	20016	Undirected	何美育	何壽山	何傳家系	何傳家系	hasBrother
10110	10068	20016	20016	Undirected	何美育	何壽川	何傳家系	何傳家系	hasBrother
10111	10066	20016	20016	Undirected	何美賢	何培庭	何傳家系	何傳家系	hasBrother
10111	10067	20016	20016	Undirected	何美賢	何壽山	何傳家系	何傳家系	hasBrother
10111	10068	20016	20016	Undirected	何美賢	何壽川	何傳家系	何傳家系	hasBrother
10115	10063	20024	20016	Undirected	何蔭治	何傳	何義家系	何傳家系	hasBrother
10115	10090	20024	20020	Undirected	何蔭治	何永	何義家系	何永家系	hasBrother
10115	10112	20024	20024	Undirected	何蔭治	何義	何義家系	何義家系	hasBrother
10116	10081	20019	20019	Undirected	何輯五	何應祿	何應欽家系	何應欽家系	hasBrother
10119	10063	20024	20016	Undirected	何金	何傳	何義家系	何傳家系	hasBrother
10119	10090	20024	20020	Undirected	何金	何永	何義家系	何永家系	hasBrother
10119	10112	20024	20024	Undirected	何金	何義	何義家系	何義家系	hasBrother
10123	10125	20030	20030	Undirected	余佳縈	余俊陞	余登發家族	余登發家族	hasBrother
10124	10125	20030	20030	Undirected	余佳臻	余俊陞	余登發家族	余登發家族	hasBrother
10129	10130	20030	20030	Undirected	余政憲	余政道	余登發家族	余登發家族	hasBrother
10129	10131	20030	20030	Undirected	余政憲	余斐宇	余登發家族	余登發家族	hasBrother
10130	10131	20030	20030	Undirected	余政道	余斐宇	余登發家族	余登發家族	hasBrother
10134	10129	20030	20030	Undirected	余玲惠	余政憲	余登發家族	余登發家族	hasBrother
10134	10130	20030	20030	Undirected	余玲惠	余政道	余登發家族	余登發家族	hasBrother
10134	10131	20030	20030	Undirected	余玲惠	余斐宇	余登發家族	余登發家族	hasBrother
10135	10129	20030	20030	Undirected	余玲敏	余政憲	余登發家族	余登發家族	hasBrother
10135	10130	20030	20030	Undirected	余玲敏	余政道	余登發家族	余登發家族	hasBrother
10135	10131	20030	20030	Undirected	余玲敏	余斐宇	余登發家族	余登發家族	hasBrother
10136	10129	20030	20030	Undirected	余玲莉	余政憲	余登發家族	余登發家族	hasBrother
10136	10130	20030	20030	Undirected	余玲莉	余政道	余登發家族	余登發家族	hasBrother
10136	10131	20030	20030	Undirected	余玲莉	余斐宇	余登發家族	余登發家族	hasBrother
10137	10129	20030	20030	Undirected	余玲雅	余政憲	余登發家族	余登發家族	hasBrother
10137	10130	20030	20030	Undirected	余玲雅	余政道	余登發家族	余登發家族	hasBrother
10137	10131	20030	20030	Undirected	余玲雅	余斐宇	余登發家族	余登發家族	hasBrother
10138	10127	20030	20030	Undirected	余珮瑛	余哲丞	余登發家族	余登發家族	hasBrother
10141	10139	20030	20030	Undirected	余綉鑾	余瑞言	余登發家族	余登發家族	hasBrother
10142	10127	20030	20030	Undirected	余若瑛	余哲丞	余登發家族	余登發家族	hasBrother
10145	13586	20040	20040	Undirected	依莉莎白奚斯	路德奚斯	倪哈奚斯家族	倪哈奚斯家族	hasBrother
10146	10151	20032	20032	Undirected	侯全成	侯圖壽	侯全成家族	侯全成家族	hasBrother
10146	10183	20032	20032	Undirected	侯全成	侯隆盛	侯全成家族	侯全成家族	hasBrother
10146	10185	20032	20032	Undirected	侯全成	侯青山	侯全成家族	侯全成家族	hasBrother
10147	10148	20035	20035	Undirected	侯博明	侯博義	侯雨利家系	侯雨利家系	hasBrother
10147	10149	20035	20035	Undirected	侯博明	侯博裕	侯雨利家系	侯雨利家系	hasBrother
10148	10149	20035	20035	Undirected	侯博義	侯博裕	侯雨利家系	侯雨利家系	hasBrother
10150	10146	20032	20032	Undirected	侯和順	侯全成	侯全成家族	侯全成家族	hasBrother
10150	10151	20032	20032	Undirected	侯和順	侯圖壽	侯全成家族	侯全成家族	hasBrother
10150	10183	20032	20032	Undirected	侯和順	侯隆盛	侯全成家族	侯全成家族	hasBrother
10150	10185	20032	20032	Undirected	侯和順	侯青山	侯全成家族	侯全成家族	hasBrother
10151	10183	20032	20032	Undirected	侯圖壽	侯隆盛	侯全成家族	侯全成家族	hasBrother
10151	10185	20032	20032	Undirected	侯圖壽	侯青山	侯全成家族	侯全成家族	hasBrother
10153	10146	20032	20032	Undirected	侯如意	侯全成	侯全成家族	侯全成家族	hasBrother
10153	10151	20032	20032	Undirected	侯如意	侯圖壽	侯全成家族	侯全成家族	hasBrother
10153	10183	20032	20032	Undirected	侯如意	侯隆盛	侯全成家族	侯全成家族	hasBrother
10153	10185	20032	20032	Undirected	侯如意	侯青山	侯全成家族	侯全成家族	hasBrother
10154	10146	20032	20032	Undirected	侯平安	侯全成	侯全成家族	侯全成家族	hasBrother
10154	10151	20032	20032	Undirected	侯平安	侯圖壽	侯全成家族	侯全成家族	hasBrother
10154	10183	20032	20032	Undirected	侯平安	侯隆盛	侯全成家族	侯全成家族	hasBrother
10154	10185	20032	20032	Undirected	侯平安	侯青山	侯全成家族	侯全成家族	hasBrother
10156	10167	20035	20035	Undirected	侯敏英	侯永松	侯雨利家系	侯雨利家系	hasBrother
10156	10168	20035	20035	Undirected	侯敏英	侯永都	侯雨利家系	侯雨利家系	hasBrother
10157	10158	20035	20035	Undirected	侯文仁	侯文信	侯雨利家系	侯雨利家系	hasBrother
10157	10159	20035	20035	Undirected	侯文仁	侯文忠	侯雨利家系	侯雨利家系	hasBrother
10158	10159	20035	20035	Undirected	侯文信	侯文忠	侯雨利家系	侯雨利家系	hasBrother
10161	10162	20032	20032	Undirected	侯書宗	侯書德	侯全成家族	侯全成家族	hasBrother
10161	10163	20032	20032	Undirected	侯書宗	侯書文	侯全成家族	侯全成家族	hasBrother
10161	10164	20032	20032	Undirected	侯書宗	侯書正	侯全成家族	侯全成家族	hasBrother
10161	10165	20032	20032	Undirected	侯書宗	侯書武	侯全成家族	侯全成家族	hasBrother
10162	10163	20032	20032	Undirected	侯書德	侯書文	侯全成家族	侯全成家族	hasBrother
10162	10164	20032	20032	Undirected	侯書德	侯書正	侯全成家族	侯全成家族	hasBrother
10162	10165	20032	20032	Undirected	侯書德	侯書武	侯全成家族	侯全成家族	hasBrother
10163	10164	20032	20032	Undirected	侯書文	侯書正	侯全成家族	侯全成家族	hasBrother
10163	10165	20032	20032	Undirected	侯書文	侯書武	侯全成家族	侯全成家族	hasBrother
10164	10165	20032	20032	Undirected	侯書正	侯書武	侯全成家族	侯全成家族	hasBrother
10166	10167	20035	20035	Undirected	侯榮秋	侯永松	侯雨利家系	侯雨利家系	hasBrother
10166	10168	20035	20035	Undirected	侯榮秋	侯永都	侯雨利家系	侯雨利家系	hasBrother
10167	10168	20035	20035	Undirected	侯永松	侯永都	侯雨利家系	侯雨利家系	hasBrother
10169	10167	20035	20035	Undirected	侯玉嫌	侯永松	侯雨利家系	侯雨利家系	hasBrother
10169	10168	20035	20035	Undirected	侯玉嫌	侯永都	侯雨利家系	侯雨利家系	hasBrother
10170	10161	20032	20032	Undirected	侯瑞枝	侯書宗	侯全成家族	侯全成家族	hasBrother
10170	10162	20032	20032	Undirected	侯瑞枝	侯書德	侯全成家族	侯全成家族	hasBrother
10170	10163	20032	20032	Undirected	侯瑞枝	侯書文	侯全成家族	侯全成家族	hasBrother
10170	10164	20032	20032	Undirected	侯瑞枝	侯書正	侯全成家族	侯全成家族	hasBrother
10170	10165	20032	20032	Undirected	侯瑞枝	侯書武	侯全成家族	侯全成家族	hasBrother
10171	10161	20032	20032	Undirected	侯瑞瑋	侯書宗	侯全成家族	侯全成家族	hasBrother
10171	10162	20032	20032	Undirected	侯瑞瑋	侯書德	侯全成家族	侯全成家族	hasBrother
10171	10163	20032	20032	Undirected	侯瑞瑋	侯書文	侯全成家族	侯全成家族	hasBrother
10171	10164	20032	20032	Undirected	侯瑞瑋	侯書正	侯全成家族	侯全成家族	hasBrother
10171	10165	20032	20032	Undirected	侯瑞瑋	侯書武	侯全成家族	侯全成家族	hasBrother
10172	10161	20032	20032	Undirected	侯瑞瑾	侯書宗	侯全成家族	侯全成家族	hasBrother
10172	10162	20032	20032	Undirected	侯瑞瑾	侯書德	侯全成家族	侯全成家族	hasBrother
10172	10163	20032	20032	Undirected	侯瑞瑾	侯書文	侯全成家族	侯全成家族	hasBrother
10172	10164	20032	20032	Undirected	侯瑞瑾	侯書正	侯全成家族	侯全成家族	hasBrother
10172	10165	20032	20032	Undirected	侯瑞瑾	侯書武	侯全成家族	侯全成家族	hasBrother
10173	10161	20032	20032	Undirected	侯瑞穗	侯書宗	侯全成家族	侯全成家族	hasBrother
10173	10162	20032	20032	Undirected	侯瑞穗	侯書德	侯全成家族	侯全成家族	hasBrother
10173	10163	20032	20032	Undirected	侯瑞穗	侯書文	侯全成家族	侯全成家族	hasBrother
10173	10164	20032	20032	Undirected	侯瑞穗	侯書正	侯全成家族	侯全成家族	hasBrother
10173	10165	20032	20032	Undirected	侯瑞穗	侯書武	侯全成家族	侯全成家族	hasBrother
10174	10161	20032	20032	Undirected	侯瑞英	侯書宗	侯全成家族	侯全成家族	hasBrother
10174	10162	20032	20032	Undirected	侯瑞英	侯書德	侯全成家族	侯全成家族	hasBrother
10174	10163	20032	20032	Undirected	侯瑞英	侯書文	侯全成家族	侯全成家族	hasBrother
10174	10164	20032	20032	Undirected	侯瑞英	侯書正	侯全成家族	侯全成家族	hasBrother
10174	10165	20032	20032	Undirected	侯瑞英	侯書武	侯全成家族	侯全成家族	hasBrother
10175	10167	20035	20035	Undirected	侯盈足	侯永松	侯雨利家系	侯雨利家系	hasBrother
10175	10168	20035	20035	Undirected	侯盈足	侯永都	侯雨利家系	侯雨利家系	hasBrother
10176	10167	20035	20035	Undirected	侯謝榴	侯永松	侯雨利家系	侯雨利家系	hasBrother
10176	10168	20035	20035	Undirected	侯謝榴	侯永都	侯雨利家系	侯雨利家系	hasBrother
10177	10167	20035	20035	Undirected	侯貴貞	侯永松	侯雨利家系	侯雨利家系	hasBrother
10177	10168	20035	20035	Undirected	侯貴貞	侯永都	侯雨利家系	侯雨利家系	hasBrother
10178	10167	20035	20035	Undirected	侯金柑	侯永松	侯雨利家系	侯雨利家系	hasBrother
10178	10168	20035	20035	Undirected	侯金柑	侯永都	侯雨利家系	侯雨利家系	hasBrother
10179	10167	20035	20035	Undirected	侯金英	侯永松	侯雨利家系	侯雨利家系	hasBrother
10179	10168	20035	20035	Undirected	侯金英	侯永都	侯雨利家系	侯雨利家系	hasBrother
10180	10167	20035	20035	Undirected	侯金足	侯永松	侯雨利家系	侯雨利家系	hasBrother
10180	10168	20035	20035	Undirected	侯金足	侯永都	侯雨利家系	侯雨利家系	hasBrother
10181	10167	20035	20035	Undirected	侯銀月	侯永松	侯雨利家系	侯雨利家系	hasBrother
10181	10168	20035	20035	Undirected	侯銀月	侯永都	侯雨利家系	侯雨利家系	hasBrother
10183	10185	20032	20032	Undirected	侯隆盛	侯青山	侯全成家族	侯全成家族	hasBrother
10186	10146	20032	20032	Undirected	侯青蓮	侯全成	侯全成家族	侯全成家族	hasBrother
10186	10151	20032	20032	Undirected	侯青蓮	侯圖壽	侯全成家族	侯全成家族	hasBrother
10186	10183	20032	20032	Undirected	侯青蓮	侯隆盛	侯全成家族	侯全成家族	hasBrother
10186	10185	20032	20032	Undirected	侯青蓮	侯青山	侯全成家族	侯全成家族	hasBrother
10190	10191	20036	20036	Undirected	俞大絪	俞大維	俞大維家系	俞大維家系	hasBrother
10190	10192	20036	20036	Undirected	俞大絪	俞大綱	俞大維家系	俞大維家系	hasBrother
10190	10194	20036	20036	Undirected	俞大絪	俞大綸	俞大維家系	俞大維家系	hasBrother
10190	10196	20036	20036	Undirected	俞大絪	俞大绂	俞大維家系	俞大維家系	hasBrother
10191	10192	20036	20036	Undirected	俞大維	俞大綱	俞大維家系	俞大維家系	hasBrother
10191	10194	20036	20036	Undirected	俞大維	俞大綸	俞大維家系	俞大維家系	hasBrother
10191	10196	20036	20036	Undirected	俞大維	俞大绂	俞大維家系	俞大維家系	hasBrother
10192	10194	20036	20036	Undirected	俞大綱	俞大綸	俞大維家系	俞大維家系	hasBrother
10192	10196	20036	20036	Undirected	俞大綱	俞大绂	俞大維家系	俞大維家系	hasBrother
10193	10191	20036	20036	Undirected	俞大綵	俞大維	俞大維家系	俞大維家系	hasBrother
10193	10192	20036	20036	Undirected	俞大綵	俞大綱	俞大維家系	俞大維家系	hasBrother
10193	10194	20036	20036	Undirected	俞大綵	俞大綸	俞大維家系	俞大維家系	hasBrother
10193	10196	20036	20036	Undirected	俞大綵	俞大绂	俞大維家系	俞大維家系	hasBrother
10194	10196	20036	20036	Undirected	俞大綸	俞大绂	俞大維家系	俞大維家系	hasBrother
10195	10191	20036	20036	Undirected	俞大縝	俞大維	俞大維家系	俞大維家系	hasBrother
10195	10192	20036	20036	Undirected	俞大縝	俞大綱	俞大維家系	俞大維家系	hasBrother
10195	10194	20036	20036	Undirected	俞大縝	俞大綸	俞大維家系	俞大維家系	hasBrother
10195	10196	20036	20036	Undirected	俞大縝	俞大绂	俞大維家系	俞大維家系	hasBrother
10197	10200	20036	20036	Undirected	俞小濟	俞揚和	俞大維家系	俞大維家系	hasBrother
10197	10203	20036	20036	Undirected	俞小濟	俞方濟	俞大維家系	俞大維家系	hasBrother
10198	10207	20036	20036	Undirected	俞強聲	俞正聲	俞大維家系	俞大維家系	hasBrother
10200	10203	20036	20036	Undirected	俞揚和	俞方濟	俞大維家系	俞大維家系	hasBrother
10202	10201	20038	20038	Undirected	俞文淵	俞政	俞政家族	俞政家族	hasBrother
10204	10205	20036	20036	Undirected	俞明詩	俞明震	俞大維家系	俞大維家系	hasBrother
10204	10206	20036	20036	Undirected	俞明詩	俞明頤	俞大維家系	俞大維家系	hasBrother
10205	10206	20036	20036	Undirected	俞明震	俞明頤	俞大維家系	俞大維家系	hasBrother
10210	10211	20042	20042	Undirected	倪公北	倪公炤	倪文亞家族	倪文亞家族	hasBrother
10216	10210	20042	20042	Undirected	倪美安	倪公北	倪文亞家族	倪文亞家族	hasBrother
10216	10211	20042	20042	Undirected	倪美安	倪公炤	倪文亞家族	倪文亞家族	hasBrother
10217	10210	20042	20042	Undirected	倪美怡	倪公北	倪文亞家族	倪文亞家族	hasBrother
10217	10211	20042	20042	Undirected	倪美怡	倪公炤	倪文亞家族	倪文亞家族	hasBrother
10218	10210	20042	20042	Undirected	倪美皓	倪公北	倪文亞家族	倪文亞家族	hasBrother
10218	10211	20042	20042	Undirected	倪美皓	倪公炤	倪文亞家族	倪文亞家族	hasBrother
10219	10220	21177	21177	Undirected	偕以利	偕叡廉	馬偕家族	馬偕家族	hasBrother
10221	10220	21177	21177	Undirected	偕瑪連	偕叡廉	馬偕家族	馬偕家族	hasBrother
10225	10228	20045	20045	Undirected	傅文成	傅達成	傅光賢家族	傅光賢家族	hasBrother
10227	10225	20045	20045	Undirected	傅稜雅	傅文成	傅光賢家族	傅光賢家族	hasBrother
10227	10228	20045	20045	Undirected	傅稜雅	傅達成	傅光賢家族	傅光賢家族	hasBrother
10231	10254	20086	20086	Undirected	劉主安	劉子祥	台南劉家家系	台南劉家家系	hasBrother
10231	10360	20086	20086	Undirected	劉主安	劉青和	台南劉家家系	台南劉家家系	hasBrother
10231	10361	20086	20086	Undirected	劉主安	劉青江	台南劉家家系	台南劉家家系	hasBrother
10231	10362	20086	20086	Undirected	劉主安	劉青波	台南劉家家系	台南劉家家系	hasBrother
10231	10363	20086	20086	Undirected	劉主安	劉青眼	台南劉家家系	台南劉家家系	hasBrother
10231	10365	20086	20086	Undirected	劉主安	劉青雲	台南劉家家系	台南劉家家系	hasBrother
10235	10277	20086	20086	Undirected	劉備世	劉改造	台南劉家家系	台南劉家家系	hasBrother
10235	10348	20086	20086	Undirected	劉備世	劉逸民	台南劉家家系	台南劉家家系	hasBrother
10235	10367	20086	20086	Undirected	劉備世	劉革新	台南劉家家系	台南劉家家系	hasBrother
10236	10237	20075	20075	Undirected	劉傳來	劉傳況	劉闊家族	劉闊家族	hasBrother
10236	10238	20075	20075	Undirected	劉傳來	劉傳能	劉闊家族	劉闊家族	hasBrother
10236	10241	20075	20075	Undirected	劉傳來	劉再生	劉闊家族	劉闊家族	hasBrother
10236	10285	20075	20075	Undirected	劉傳來	劉明	劉闊家族	劉闊家族	hasBrother
10237	10238	20075	20075	Undirected	劉傳況	劉傳能	劉闊家族	劉闊家族	hasBrother
10237	10241	20075	20075	Undirected	劉傳況	劉再生	劉闊家族	劉闊家族	hasBrother
10237	10285	20075	20075	Undirected	劉傳況	劉明	劉闊家族	劉闊家族	hasBrother
10238	10241	20075	20075	Undirected	劉傳能	劉再生	劉闊家族	劉闊家族	hasBrother
10238	10285	20075	20075	Undirected	劉傳能	劉明	劉闊家族	劉闊家族	hasBrother
10240	10242	20060	20060	Undirected	劉六五	劉啓祥	劉明朝家系	劉明朝家系	hasBrother
10240	10253	20060	20060	Undirected	劉六五	劉如霖	劉明朝家系	劉明朝家系	hasBrother
10240	10282	20060	20060	Undirected	劉六五	劉昌善	劉明朝家系	劉明朝家系	hasBrother
10240	10307	20060	20060	Undirected	劉六五	劉清井	劉明朝家系	劉明朝家系	hasBrother
10241	10285	20075	20075	Undirected	劉再生	劉明	劉闊家族	劉闊家族	hasBrother
10242	10253	20060	20060	Undirected	劉啓祥	劉如霖	劉明朝家系	劉明朝家系	hasBrother
10242	10282	20060	20060	Undirected	劉啓祥	劉昌善	劉明朝家系	劉明朝家系	hasBrother
10242	10307	20060	20060	Undirected	劉啓祥	劉清井	劉明朝家系	劉明朝家系	hasBrother
10243	10291	20077	20077	Undirected	劉喬佳	劉朝凱	劉順天家族	劉順天家族	hasBrother
10243	10294	20077	20077	Undirected	劉喬佳	劉朝瀚	劉順天家族	劉順天家族	hasBrother
10244	10245	20076	20076	Undirected	劉國康	劉國昭	劉闊才家系	劉闊才家系	hasBrother
10244	10246	20076	20076	Undirected	劉國康	劉國鎮	劉闊才家系	劉闊才家系	hasBrother
10245	10246	20076	20076	Undirected	劉國昭	劉國鎮	劉闊才家系	劉闊才家系	hasBrother
10249	10321	20086	20086	Undirected	劉大粒	劉瑞山	台南劉家家系	台南劉家家系	hasBrother
10249	10354	20086	20086	Undirected	劉大粒	劉錫五	台南劉家家系	台南劉家家系	hasBrother
10249	10375	20086	20086	Undirected	劉大粒	劉麒麟	台南劉家家系	台南劉家家系	hasBrother
10250	10251	20076	20076	Undirected	劉大衛	劉大頌	劉闊才家系	劉闊才家系	hasBrother
10253	10282	20060	20060	Undirected	劉如霖	劉昌善	劉明朝家系	劉明朝家系	hasBrother
10253	10307	20060	20060	Undirected	劉如霖	劉清井	劉明朝家系	劉明朝家系	hasBrother
10254	10360	20086	20086	Undirected	劉子祥	劉青和	台南劉家家系	台南劉家家系	hasBrother
10254	10361	20086	20086	Undirected	劉子祥	劉青江	台南劉家家系	台南劉家家系	hasBrother
10254	10362	20086	20086	Undirected	劉子祥	劉青波	台南劉家家系	台南劉家家系	hasBrother
10254	10363	20086	20086	Undirected	劉子祥	劉青眼	台南劉家家系	台南劉家家系	hasBrother
10254	10365	20086	20086	Undirected	劉子祥	劉青雲	台南劉家家系	台南劉家家系	hasBrother
10255	10364	20086	20086	Undirected	劉宇治	劉青藜	台南劉家家系	台南劉家家系	hasBrother
10255	10366	20086	20086	Undirected	劉宇治	劉青風	台南劉家家系	台南劉家家系	hasBrother
10261	10231	20086	20086	Undirected	劉彩仁	劉主安	台南劉家家系	台南劉家家系	hasBrother
10261	10254	20086	20086	Undirected	劉彩仁	劉子祥	台南劉家家系	台南劉家家系	hasBrother
10261	10360	20086	20086	Undirected	劉彩仁	劉青和	台南劉家家系	台南劉家家系	hasBrother
10261	10361	20086	20086	Undirected	劉彩仁	劉青江	台南劉家家系	台南劉家家系	hasBrother
10261	10362	20086	20086	Undirected	劉彩仁	劉青波	台南劉家家系	台南劉家家系	hasBrother
10261	10363	20086	20086	Undirected	劉彩仁	劉青眼	台南劉家家系	台南劉家家系	hasBrother
10261	10365	20086	20086	Undirected	劉彩仁	劉青雲	台南劉家家系	台南劉家家系	hasBrother
10262	10303	20086	20086	Undirected	劉德勇	劉正雄	台南劉家家系	台南劉家家系	hasBrother
10262	10335	20086	20086	Undirected	劉德勇	劉篤信	台南劉家家系	台南劉家家系	hasBrother
10264	10281	20075	20075	Undirected	劉心心	劉旺基	劉闊家族	劉闊家族	hasBrother
10264	10296	20075	20075	Undirected	劉心心	劉榮凱	劉闊家族	劉闊家族	hasBrother
10264	10297	20075	20075	Undirected	劉心心	劉榮基	劉闊家族	劉闊家族	hasBrother
10264	10299	20075	20075	Undirected	劉心心	劉榮寬	劉闊家族	劉闊家族	hasBrother
10265	10364	20086	20086	Undirected	劉快治	劉青藜	台南劉家家系	台南劉家家系	hasBrother
10265	10366	20086	20086	Undirected	劉快治	劉青風	台南劉家家系	台南劉家家系	hasBrother
10266	10298	20075	20075	Undirected	劉惠妍	劉榮宏	劉闊家族	劉闊家族	hasBrother
10266	10300	20075	20075	Undirected	劉惠妍	劉榮精	劉闊家族	劉闊家族	hasBrother
10266	10301	20075	20075	Undirected	劉惠妍	劉榮超	劉闊家族	劉闊家族	hasBrother
10266	10302	20075	20075	Undirected	劉惠妍	劉榮顯	劉闊家族	劉闊家族	hasBrother
10267	10298	20075	20075	Undirected	劉惠昭	劉榮宏	劉闊家族	劉闊家族	hasBrother
10267	10300	20075	20075	Undirected	劉惠昭	劉榮精	劉闊家族	劉闊家族	hasBrother
10267	10301	20075	20075	Undirected	劉惠昭	劉榮超	劉闊家族	劉闊家族	hasBrother
10267	10302	20075	20075	Undirected	劉惠昭	劉榮顯	劉闊家族	劉闊家族	hasBrother
10268	10298	20075	20075	Undirected	劉惠津	劉榮宏	劉闊家族	劉闊家族	hasBrother
10268	10300	20075	20075	Undirected	劉惠津	劉榮精	劉闊家族	劉闊家族	hasBrother
10268	10301	20075	20075	Undirected	劉惠津	劉榮超	劉闊家族	劉闊家族	hasBrother
10268	10302	20075	20075	Undirected	劉惠津	劉榮顯	劉闊家族	劉闊家族	hasBrother
10269	10244	20076	20076	Undirected	劉惠瑛	劉國康	劉闊才家系	劉闊才家系	hasBrother
10269	10245	20076	20076	Undirected	劉惠瑛	劉國昭	劉闊才家系	劉闊才家系	hasBrother
10269	10246	20076	20076	Undirected	劉惠瑛	劉國鎮	劉闊才家系	劉闊才家系	hasBrother
10271	10298	20075	20075	Undirected	劉惠麗	劉榮宏	劉闊家族	劉闊家族	hasBrother
10271	10300	20075	20075	Undirected	劉惠麗	劉榮精	劉闊家族	劉闊家族	hasBrother
10271	10301	20075	20075	Undirected	劉惠麗	劉榮超	劉闊家族	劉闊家族	hasBrother
10271	10302	20075	20075	Undirected	劉惠麗	劉榮顯	劉闊家族	劉闊家族	hasBrother
10272	10235	20086	20086	Undirected	劉慶理	劉備世	台南劉家家系	台南劉家家系	hasBrother
10272	10277	20086	20086	Undirected	劉慶理	劉改造	台南劉家家系	台南劉家家系	hasBrother
10272	10348	20086	20086	Undirected	劉慶理	劉逸民	台南劉家家系	台南劉家家系	hasBrother
10272	10367	20086	20086	Undirected	劉慶理	劉革新	台南劉家家系	台南劉家家系	hasBrother
10275	10281	20075	20075	Undirected	劉招英	劉旺基	劉闊家族	劉闊家族	hasBrother
10275	10296	20075	20075	Undirected	劉招英	劉榮凱	劉闊家族	劉闊家族	hasBrother
10275	10297	20075	20075	Undirected	劉招英	劉榮基	劉闊家族	劉闊家族	hasBrother
10275	10299	20075	20075	Undirected	劉招英	劉榮寬	劉闊家族	劉闊家族	hasBrother
10276	10281	20075	20075	Undirected	劉招華	劉旺基	劉闊家族	劉闊家族	hasBrother
10276	10296	20075	20075	Undirected	劉招華	劉榮凱	劉闊家族	劉闊家族	hasBrother
10276	10297	20075	20075	Undirected	劉招華	劉榮基	劉闊家族	劉闊家族	hasBrother
10276	10299	20075	20075	Undirected	劉招華	劉榮寬	劉闊家族	劉闊家族	hasBrother
10277	10348	20086	20086	Undirected	劉改造	劉逸民	台南劉家家系	台南劉家家系	hasBrother
10277	10367	20086	20086	Undirected	劉改造	劉革新	台南劉家家系	台南劉家家系	hasBrother
10278	10279	20086	20086	Undirected	劉文岳	劉文嶼	台南劉家家系	台南劉家家系	hasBrother
10281	10296	20075	20075	Undirected	劉旺基	劉榮凱	劉闊家族	劉闊家族	hasBrother
10281	10297	20075	20075	Undirected	劉旺基	劉榮基	劉闊家族	劉闊家族	hasBrother
10281	10299	20075	20075	Undirected	劉旺基	劉榮寬	劉闊家族	劉闊家族	hasBrother
10282	10307	20060	20060	Undirected	劉昌善	劉清井	劉明朝家系	劉明朝家系	hasBrother
10286	10287	20060	20060	Undirected	劉明哲	劉明朝	劉明朝家系	劉明朝家系	hasBrother
10286	10288	20060	20060	Undirected	劉明哲	劉明電	劉明朝家系	劉明朝家系	hasBrother
10287	10288	20060	20060	Undirected	劉明朝	劉明電	劉明朝家系	劉明朝家系	hasBrother
10289	10281	20075	20075	Undirected	劉昭惠	劉旺基	劉闊家族	劉闊家族	hasBrother
10289	10296	20075	20075	Undirected	劉昭惠	劉榮凱	劉闊家族	劉闊家族	hasBrother
10289	10297	20075	20075	Undirected	劉昭惠	劉榮基	劉闊家族	劉闊家族	hasBrother
10289	10299	20075	20075	Undirected	劉昭惠	劉榮寬	劉闊家族	劉闊家族	hasBrother
10291	10294	20077	20077	Undirected	劉朝凱	劉朝瀚	劉順天家族	劉順天家族	hasBrother
10292	10293	20077	20077	Undirected	劉朝勝	劉朝日	劉順天家族	劉順天家族	hasBrother
10296	10297	20075	20075	Undirected	劉榮凱	劉榮基	劉闊家族	劉闊家族	hasBrother
10296	10299	20075	20075	Undirected	劉榮凱	劉榮寬	劉闊家族	劉闊家族	hasBrother
10297	10299	20075	20075	Undirected	劉榮基	劉榮寬	劉闊家族	劉闊家族	hasBrother
10298	10300	20075	20075	Undirected	劉榮宏	劉榮精	劉闊家族	劉闊家族	hasBrother
10298	10301	20075	20075	Undirected	劉榮宏	劉榮超	劉闊家族	劉闊家族	hasBrother
10298	10302	20075	20075	Undirected	劉榮宏	劉榮顯	劉闊家族	劉闊家族	hasBrother
10300	10301	20075	20075	Undirected	劉榮精	劉榮超	劉闊家族	劉闊家族	hasBrother
10300	10302	20075	20075	Undirected	劉榮精	劉榮顯	劉闊家族	劉闊家族	hasBrother
10301	10302	20075	20075	Undirected	劉榮超	劉榮顯	劉闊家族	劉闊家族	hasBrother
10303	10335	20086	20086	Undirected	劉正雄	劉篤信	台南劉家家系	台南劉家家系	hasBrother
10309	10234	20086	20086	Undirected	劉渝	劉偉德	台南劉家家系	台南劉家家系	hasBrother
10310	10234	20086	20086	Undirected	劉湄	劉偉德	台南劉家家系	台南劉家家系	hasBrother
10311	10244	20076	20076	Undirected	劉潤瑛	劉國康	劉闊才家系	劉闊才家系	hasBrother
10311	10245	20076	20076	Undirected	劉潤瑛	劉國昭	劉闊才家系	劉闊才家系	hasBrother
10311	10246	20076	20076	Undirected	劉潤瑛	劉國鎮	劉闊才家系	劉闊才家系	hasBrother
10312	10313	20077	20077	Undirected	劉炳中	劉炳偉	劉順天家族	劉順天家族	hasBrother
10312	10314	20077	20077	Undirected	劉炳中	劉炳煌	劉順天家族	劉順天家族	hasBrother
10312	10316	20077	20077	Undirected	劉炳中	劉炳華	劉順天家族	劉順天家族	hasBrother
10313	10314	20077	20077	Undirected	劉炳偉	劉炳煌	劉順天家族	劉順天家族	hasBrother
10313	10316	20077	20077	Undirected	劉炳偉	劉炳華	劉順天家族	劉順天家族	hasBrother
10314	10316	20077	20077	Undirected	劉炳煌	劉炳華	劉順天家族	劉順天家族	hasBrother
10319	10357	20076	20076	Undirected	劉玉英	劉闊才	劉闊才家系	劉闊才家系	hasBrother
10321	10354	20086	20086	Undirected	劉瑞山	劉錫五	台南劉家家系	台南劉家家系	hasBrother
10321	10375	20086	20086	Undirected	劉瑞山	劉麒麟	台南劉家家系	台南劉家家系	hasBrother
10322	10244	20076	20076	Undirected	劉瑞瑛	劉國康	劉闊才家系	劉闊才家系	hasBrother
10322	10245	20076	20076	Undirected	劉瑞瑛	劉國昭	劉闊才家系	劉闊才家系	hasBrother
10322	10246	20076	20076	Undirected	劉瑞瑛	劉國鎮	劉闊才家系	劉闊才家系	hasBrother
10324	10317	20060	20060	Undirected	劉神嶽	劉焜煌	劉明朝家系	劉明朝家系	hasBrother
10325	10231	20086	20086	Undirected	劉秀滿	劉主安	台南劉家家系	台南劉家家系	hasBrother
10325	10254	20086	20086	Undirected	劉秀滿	劉子祥	台南劉家家系	台南劉家家系	hasBrother
10325	10360	20086	20086	Undirected	劉秀滿	劉青和	台南劉家家系	台南劉家家系	hasBrother
10325	10361	20086	20086	Undirected	劉秀滿	劉青江	台南劉家家系	台南劉家家系	hasBrother
10325	10362	20086	20086	Undirected	劉秀滿	劉青波	台南劉家家系	台南劉家家系	hasBrother
10325	10363	20086	20086	Undirected	劉秀滿	劉青眼	台南劉家家系	台南劉家家系	hasBrother
10325	10365	20086	20086	Undirected	劉秀滿	劉青雲	台南劉家家系	台南劉家家系	hasBrother
10326	10364	20086	20086	Undirected	劉秀珒	劉青藜	台南劉家家系	台南劉家家系	hasBrother
10326	10366	20086	20086	Undirected	劉秀珒	劉青風	台南劉家家系	台南劉家家系	hasBrother
10327	10231	20086	20086	Undirected	劉秀琴	劉主安	台南劉家家系	台南劉家家系	hasBrother
10327	10254	20086	20086	Undirected	劉秀琴	劉子祥	台南劉家家系	台南劉家家系	hasBrother
10327	10360	20086	20086	Undirected	劉秀琴	劉青和	台南劉家家系	台南劉家家系	hasBrother
10327	10361	20086	20086	Undirected	劉秀琴	劉青江	台南劉家家系	台南劉家家系	hasBrother
10327	10362	20086	20086	Undirected	劉秀琴	劉青波	台南劉家家系	台南劉家家系	hasBrother
10327	10363	20086	20086	Undirected	劉秀琴	劉青眼	台南劉家家系	台南劉家家系	hasBrother
10327	10365	20086	20086	Undirected	劉秀琴	劉青雲	台南劉家家系	台南劉家家系	hasBrother
10328	10349	20060	20060	Undirected	劉秀芬	劉邦雄	劉明朝家系	劉明朝家系	hasBrother
10329	10349	20060	20060	Undirected	劉秀英	劉邦雄	劉明朝家系	劉明朝家系	hasBrother
10330	10231	20086	20086	Undirected	劉秀華	劉主安	台南劉家家系	台南劉家家系	hasBrother
10330	10254	20086	20086	Undirected	劉秀華	劉子祥	台南劉家家系	台南劉家家系	hasBrother
10330	10360	20086	20086	Undirected	劉秀華	劉青和	台南劉家家系	台南劉家家系	hasBrother
10330	10361	20086	20086	Undirected	劉秀華	劉青江	台南劉家家系	台南劉家家系	hasBrother
10330	10362	20086	20086	Undirected	劉秀華	劉青波	台南劉家家系	台南劉家家系	hasBrother
10330	10363	20086	20086	Undirected	劉秀華	劉青眼	台南劉家家系	台南劉家家系	hasBrother
10330	10365	20086	20086	Undirected	劉秀華	劉青雲	台南劉家家系	台南劉家家系	hasBrother
10331	10349	20060	20060	Undirected	劉秀蓉	劉邦雄	劉明朝家系	劉明朝家系	hasBrother
10332	10349	20060	20060	Undirected	劉秀薗	劉邦雄	劉明朝家系	劉明朝家系	hasBrother
10333	10231	20086	20086	Undirected	劉秀霞	劉主安	台南劉家家系	台南劉家家系	hasBrother
10333	10254	20086	20086	Undirected	劉秀霞	劉子祥	台南劉家家系	台南劉家家系	hasBrother
10333	10360	20086	20086	Undirected	劉秀霞	劉青和	台南劉家家系	台南劉家家系	hasBrother
10333	10361	20086	20086	Undirected	劉秀霞	劉青江	台南劉家家系	台南劉家家系	hasBrother
10333	10362	20086	20086	Undirected	劉秀霞	劉青波	台南劉家家系	台南劉家家系	hasBrother
10333	10363	20086	20086	Undirected	劉秀霞	劉青眼	台南劉家家系	台南劉家家系	hasBrother
10333	10365	20086	20086	Undirected	劉秀霞	劉青雲	台南劉家家系	台南劉家家系	hasBrother
10337	10256	20066	20066	Undirected	劉美惠	劉寬平	劉焜煌家族	劉焜煌家族	hasBrother
10338	10292	20077	20077	Undirected	劉美芳	劉朝勝	劉順天家族	劉順天家族	hasBrother
10338	10293	20077	20077	Undirected	劉美芳	劉朝日	劉順天家族	劉順天家族	hasBrother
10339	10236	20075	20075	Undirected	劉翠煥	劉傳來	劉闊家族	劉闊家族	hasBrother
10339	10237	20075	20075	Undirected	劉翠煥	劉傳況	劉闊家族	劉闊家族	hasBrother
10339	10238	20075	20075	Undirected	劉翠煥	劉傳能	劉闊家族	劉闊家族	hasBrother
10339	10241	20075	20075	Undirected	劉翠煥	劉再生	劉闊家族	劉闊家族	hasBrother
10339	10285	20075	20075	Undirected	劉翠煥	劉明	劉闊家族	劉闊家族	hasBrother
10341	10364	20086	20086	Undirected	劉聰慧	劉青藜	台南劉家家系	台南劉家家系	hasBrother
10341	10366	20086	20086	Undirected	劉聰慧	劉青風	台南劉家家系	台南劉家家系	hasBrother
10342	10234	20086	20086	Undirected	劉若華	劉偉德	台南劉家家系	台南劉家家系	hasBrother
10345	10278	20086	20086	Undirected	劉蕙君	劉文岳	台南劉家家系	台南劉家家系	hasBrother
10345	10279	20086	20086	Undirected	劉蕙君	劉文嶼	台南劉家家系	台南劉家家系	hasBrother
10346	10364	20086	20086	Undirected	劉謹治	劉青藜	台南劉家家系	台南劉家家系	hasBrother
10346	10366	20086	20086	Undirected	劉謹治	劉青風	台南劉家家系	台南劉家家系	hasBrother
10348	10367	20086	20086	Undirected	劉逸民	劉革新	台南劉家家系	台南劉家家系	hasBrother
10350	10244	20076	20076	Undirected	劉郁瑛	劉國康	劉闊才家系	劉闊才家系	hasBrother
10350	10245	20076	20076	Undirected	劉郁瑛	劉國昭	劉闊才家系	劉闊才家系	hasBrother
10350	10246	20076	20076	Undirected	劉郁瑛	劉國鎮	劉闊才家系	劉闊才家系	hasBrother
10351	10236	20075	20075	Undirected	劉金	劉傳來	劉闊家族	劉闊家族	hasBrother
10351	10237	20075	20075	Undirected	劉金	劉傳況	劉闊家族	劉闊家族	hasBrother
10351	10238	20075	20075	Undirected	劉金	劉傳能	劉闊家族	劉闊家族	hasBrother
10351	10241	20075	20075	Undirected	劉金	劉再生	劉闊家族	劉闊家族	hasBrother
10351	10285	20075	20075	Undirected	劉金	劉明	劉闊家族	劉闊家族	hasBrother
10352	10236	20075	20075	Undirected	劉銀	劉傳來	劉闊家族	劉闊家族	hasBrother
10352	10237	20075	20075	Undirected	劉銀	劉傳況	劉闊家族	劉闊家族	hasBrother
10352	10238	20075	20075	Undirected	劉銀	劉傳能	劉闊家族	劉闊家族	hasBrother
10352	10241	20075	20075	Undirected	劉銀	劉再生	劉闊家族	劉闊家族	hasBrother
10352	10285	20075	20075	Undirected	劉銀	劉明	劉闊家族	劉闊家族	hasBrother
10353	10236	20075	20075	Undirected	劉錢	劉傳來	劉闊家族	劉闊家族	hasBrother
10353	10237	20075	20075	Undirected	劉錢	劉傳況	劉闊家族	劉闊家族	hasBrother
10353	10238	20075	20075	Undirected	劉錢	劉傳能	劉闊家族	劉闊家族	hasBrother
10353	10241	20075	20075	Undirected	劉錢	劉再生	劉闊家族	劉闊家族	hasBrother
10353	10285	20075	20075	Undirected	劉錢	劉明	劉闊家族	劉闊家族	hasBrother
10354	10375	20086	20086	Undirected	劉錫五	劉麒麟	台南劉家家系	台南劉家家系	hasBrother
10356	10237	20075	20075	Undirected	劉闊	劉傳況	劉闊家族	劉闊家族	hasBrother
10360	10361	20086	20086	Undirected	劉青和	劉青江	台南劉家家系	台南劉家家系	hasBrother
10360	10362	20086	20086	Undirected	劉青和	劉青波	台南劉家家系	台南劉家家系	hasBrother
10360	10363	20086	20086	Undirected	劉青和	劉青眼	台南劉家家系	台南劉家家系	hasBrother
10360	10365	20086	20086	Undirected	劉青和	劉青雲	台南劉家家系	台南劉家家系	hasBrother
10361	10362	20086	20086	Undirected	劉青江	劉青波	台南劉家家系	台南劉家家系	hasBrother
10361	10363	20086	20086	Undirected	劉青江	劉青眼	台南劉家家系	台南劉家家系	hasBrother
10361	10365	20086	20086	Undirected	劉青江	劉青雲	台南劉家家系	台南劉家家系	hasBrother
10362	10363	20086	20086	Undirected	劉青波	劉青眼	台南劉家家系	台南劉家家系	hasBrother
10362	10365	20086	20086	Undirected	劉青波	劉青雲	台南劉家家系	台南劉家家系	hasBrother
10363	10365	20086	20086	Undirected	劉青眼	劉青雲	台南劉家家系	台南劉家家系	hasBrother
10364	10366	20086	20086	Undirected	劉青藜	劉青風	台南劉家家系	台南劉家家系	hasBrother
10368	10369	20077	20077	Undirected	劉順天	劉順成	劉順天家族	劉順天家族	hasBrother
10371	10372	20086	20086	Undirected	劉鴻彰	劉鴻烈	台南劉家家系	台南劉家家系	hasBrother
10371	10373	20086	20086	Undirected	劉鴻彰	劉鴻誠	台南劉家家系	台南劉家家系	hasBrother
10372	10373	20086	20086	Undirected	劉鴻烈	劉鴻誠	台南劉家家系	台南劉家家系	hasBrother
10385	10386	20091	20091	Undirected	吉承之	吉承俠	吉章簡家族	吉章簡家族	hasBrother
10385	10387	20091	20091	Undirected	吉承之	吉承凱	吉章簡家族	吉章簡家族	hasBrother
10385	10388	20091	20091	Undirected	吉承之	吉承勳	吉章簡家族	吉章簡家族	hasBrother
10385	10389	20091	20091	Undirected	吉承之	吉承國	吉章簡家族	吉章簡家族	hasBrother
10385	10391	20091	20091	Undirected	吉承之	吉承斌	吉章簡家族	吉章簡家族	hasBrother
10385	10394	20091	20091	Undirected	吉承之	吉承進	吉章簡家族	吉章簡家族	hasBrother
10385	10395	20091	20091	Undirected	吉承之	吉承邦	吉章簡家族	吉章簡家族	hasBrother
10385	10396	20091	20091	Undirected	吉承之	吉承鏡	吉章簡家族	吉章簡家族	hasBrother
10386	10387	20091	20091	Undirected	吉承俠	吉承凱	吉章簡家族	吉章簡家族	hasBrother
10386	10388	20091	20091	Undirected	吉承俠	吉承勳	吉章簡家族	吉章簡家族	hasBrother
10386	10389	20091	20091	Undirected	吉承俠	吉承國	吉章簡家族	吉章簡家族	hasBrother
10386	10391	20091	20091	Undirected	吉承俠	吉承斌	吉章簡家族	吉章簡家族	hasBrother
10386	10394	20091	20091	Undirected	吉承俠	吉承進	吉章簡家族	吉章簡家族	hasBrother
10386	10395	20091	20091	Undirected	吉承俠	吉承邦	吉章簡家族	吉章簡家族	hasBrother
10386	10396	20091	20091	Undirected	吉承俠	吉承鏡	吉章簡家族	吉章簡家族	hasBrother
10387	10388	20091	20091	Undirected	吉承凱	吉承勳	吉章簡家族	吉章簡家族	hasBrother
10387	10389	20091	20091	Undirected	吉承凱	吉承國	吉章簡家族	吉章簡家族	hasBrother
10387	10391	20091	20091	Undirected	吉承凱	吉承斌	吉章簡家族	吉章簡家族	hasBrother
10387	10394	20091	20091	Undirected	吉承凱	吉承進	吉章簡家族	吉章簡家族	hasBrother
10387	10395	20091	20091	Undirected	吉承凱	吉承邦	吉章簡家族	吉章簡家族	hasBrother
10387	10396	20091	20091	Undirected	吉承凱	吉承鏡	吉章簡家族	吉章簡家族	hasBrother
10388	10389	20091	20091	Undirected	吉承勳	吉承國	吉章簡家族	吉章簡家族	hasBrother
10388	10391	20091	20091	Undirected	吉承勳	吉承斌	吉章簡家族	吉章簡家族	hasBrother
10388	10394	20091	20091	Undirected	吉承勳	吉承進	吉章簡家族	吉章簡家族	hasBrother
10388	10395	20091	20091	Undirected	吉承勳	吉承邦	吉章簡家族	吉章簡家族	hasBrother
10388	10396	20091	20091	Undirected	吉承勳	吉承鏡	吉章簡家族	吉章簡家族	hasBrother
10389	10391	20091	20091	Undirected	吉承國	吉承斌	吉章簡家族	吉章簡家族	hasBrother
10389	10394	20091	20091	Undirected	吉承國	吉承進	吉章簡家族	吉章簡家族	hasBrother
10389	10395	20091	20091	Undirected	吉承國	吉承邦	吉章簡家族	吉章簡家族	hasBrother
10389	10396	20091	20091	Undirected	吉承國	吉承鏡	吉章簡家族	吉章簡家族	hasBrother
10390	10385	20091	20091	Undirected	吉承慶	吉承之	吉章簡家族	吉章簡家族	hasBrother
10390	10386	20091	20091	Undirected	吉承慶	吉承俠	吉章簡家族	吉章簡家族	hasBrother
10390	10387	20091	20091	Undirected	吉承慶	吉承凱	吉章簡家族	吉章簡家族	hasBrother
10390	10388	20091	20091	Undirected	吉承慶	吉承勳	吉章簡家族	吉章簡家族	hasBrother
10390	10389	20091	20091	Undirected	吉承慶	吉承國	吉章簡家族	吉章簡家族	hasBrother
10390	10391	20091	20091	Undirected	吉承慶	吉承斌	吉章簡家族	吉章簡家族	hasBrother
10390	10394	20091	20091	Undirected	吉承慶	吉承進	吉章簡家族	吉章簡家族	hasBrother
10390	10395	20091	20091	Undirected	吉承慶	吉承邦	吉章簡家族	吉章簡家族	hasBrother
10390	10396	20091	20091	Undirected	吉承慶	吉承鏡	吉章簡家族	吉章簡家族	hasBrother
10391	10394	20091	20091	Undirected	吉承斌	吉承進	吉章簡家族	吉章簡家族	hasBrother
10391	10395	20091	20091	Undirected	吉承斌	吉承邦	吉章簡家族	吉章簡家族	hasBrother
10391	10396	20091	20091	Undirected	吉承斌	吉承鏡	吉章簡家族	吉章簡家族	hasBrother
10392	10385	20091	20091	Undirected	吉承曼	吉承之	吉章簡家族	吉章簡家族	hasBrother
10392	10386	20091	20091	Undirected	吉承曼	吉承俠	吉章簡家族	吉章簡家族	hasBrother
10392	10387	20091	20091	Undirected	吉承曼	吉承凱	吉章簡家族	吉章簡家族	hasBrother
10392	10388	20091	20091	Undirected	吉承曼	吉承勳	吉章簡家族	吉章簡家族	hasBrother
10392	10389	20091	20091	Undirected	吉承曼	吉承國	吉章簡家族	吉章簡家族	hasBrother
10392	10391	20091	20091	Undirected	吉承曼	吉承斌	吉章簡家族	吉章簡家族	hasBrother
10392	10394	20091	20091	Undirected	吉承曼	吉承進	吉章簡家族	吉章簡家族	hasBrother
10392	10395	20091	20091	Undirected	吉承曼	吉承邦	吉章簡家族	吉章簡家族	hasBrother
10392	10396	20091	20091	Undirected	吉承曼	吉承鏡	吉章簡家族	吉章簡家族	hasBrother
10393	10385	20091	20091	Undirected	吉承蘭	吉承之	吉章簡家族	吉章簡家族	hasBrother
10393	10386	20091	20091	Undirected	吉承蘭	吉承俠	吉章簡家族	吉章簡家族	hasBrother
10393	10387	20091	20091	Undirected	吉承蘭	吉承凱	吉章簡家族	吉章簡家族	hasBrother
10393	10388	20091	20091	Undirected	吉承蘭	吉承勳	吉章簡家族	吉章簡家族	hasBrother
10393	10389	20091	20091	Undirected	吉承蘭	吉承國	吉章簡家族	吉章簡家族	hasBrother
10393	10391	20091	20091	Undirected	吉承蘭	吉承斌	吉章簡家族	吉章簡家族	hasBrother
10393	10395	20091	20091	Undirected	吉承蘭	吉承邦	吉章簡家族	吉章簡家族	hasBrother
10393	10396	20091	20091	Undirected	吉承蘭	吉承鏡	吉章簡家族	吉章簡家族	hasBrother
10394	10395	20091	20091	Undirected	吉承進	吉承邦	吉章簡家族	吉章簡家族	hasBrother
10394	10396	20091	20091	Undirected	吉承進	吉承鏡	吉章簡家族	吉章簡家族	hasBrother
10395	10396	20091	20091	Undirected	吉承邦	吉承鏡	吉章簡家族	吉章簡家族	hasBrother
10397	10385	20091	20091	Undirected	吉承飛	吉承之	吉章簡家族	吉章簡家族	hasBrother
10397	10386	20091	20091	Undirected	吉承飛	吉承俠	吉章簡家族	吉章簡家族	hasBrother
10397	10387	20091	20091	Undirected	吉承飛	吉承凱	吉章簡家族	吉章簡家族	hasBrother
10397	10388	20091	20091	Undirected	吉承飛	吉承勳	吉章簡家族	吉章簡家族	hasBrother
10397	10389	20091	20091	Undirected	吉承飛	吉承國	吉章簡家族	吉章簡家族	hasBrother
10397	10391	20091	20091	Undirected	吉承飛	吉承斌	吉章簡家族	吉章簡家族	hasBrother
10397	10394	20091	20091	Undirected	吉承飛	吉承進	吉章簡家族	吉章簡家族	hasBrother
10397	10395	20091	20091	Undirected	吉承飛	吉承邦	吉章簡家族	吉章簡家族	hasBrother
10397	10396	20091	20091	Undirected	吉承飛	吉承鏡	吉章簡家族	吉章簡家族	hasBrother
10398	10385	20091	20091	Undirected	吉承麗	吉承之	吉章簡家族	吉章簡家族	hasBrother
10398	10386	20091	20091	Undirected	吉承麗	吉承俠	吉章簡家族	吉章簡家族	hasBrother
10398	10387	20091	20091	Undirected	吉承麗	吉承凱	吉章簡家族	吉章簡家族	hasBrother
10398	10388	20091	20091	Undirected	吉承麗	吉承勳	吉章簡家族	吉章簡家族	hasBrother
10398	10389	20091	20091	Undirected	吉承麗	吉承國	吉章簡家族	吉章簡家族	hasBrother
10398	10391	20091	20091	Undirected	吉承麗	吉承斌	吉章簡家族	吉章簡家族	hasBrother
10398	10394	20091	20091	Undirected	吉承麗	吉承進	吉章簡家族	吉章簡家族	hasBrother
10398	10395	20091	20091	Undirected	吉承麗	吉承邦	吉章簡家族	吉章簡家族	hasBrother
10398	10396	20091	20091	Undirected	吉承麗	吉承鏡	吉章簡家族	吉章簡家族	hasBrother
10403	10409	20535	20535	Undirected	吳世雄	吳伯雄	桃園吳家家系	桃園吳家家系	hasBrother
10403	10601	20535	20535	Undirected	吳世雄	吳運雄	桃園吳家家系	桃園吳家家系	hasBrother
10404	10514	20114	20114	Undirected	吳京	吳東勝	吳火獅家系	吳火獅家系	hasBrother
10404	10518	20114	20114	Undirected	吳京	吳東權	吳火獅家系	吳火獅家系	hasBrother
10404	10519	20114	20114	Undirected	吳京	吳東泰	吳火獅家系	吳火獅家系	hasBrother
10405	10506	20095	20095	Undirected	吳亮宏	吳春甫	吳修齊家系	吳修齊家系	hasBrother
10405	10507	20095	20095	Undirected	吳亮宏	吳昭男	吳修齊家系	吳修齊家系	hasBrother
10405	10583	20095	20095	Undirected	吳亮宏	吳英辰	吳修齊家系	吳修齊家系	hasBrother
10405	10590	20095	20095	Undirected	吳亮宏	吳貞良	吳修齊家系	吳修齊家系	hasBrother
10406	10562	20535	20535	Undirected	吳仁光	吳白光	桃園吳家家系	桃園吳家家系	hasBrother
10406	10596	20535	20535	Undirected	吳仁光	吳運嘉	桃園吳家家系	桃園吳家家系	hasBrother
10406	10602	20535	20535	Undirected	吳仁光	吳郁夫	桃園吳家家系	桃園吳家家系	hasBrother
10407	10459	20095	20095	Undirected	吳仁和	吳崑崙	吳修齊家系	吳修齊家系	hasBrother
10407	10545	20095	20095	Undirected	吳仁和	吳泉	吳修齊家系	吳修齊家系	hasBrother
10408	10514	20114	20114	Undirected	吳介文	吳東勝	吳火獅家系	吳火獅家系	hasBrother
10408	10518	20114	20114	Undirected	吳介文	吳東權	吳火獅家系	吳火獅家系	hasBrother
10408	10519	20114	20114	Undirected	吳介文	吳東泰	吳火獅家系	吳火獅家系	hasBrother
10409	10601	20535	20535	Undirected	吳伯雄	吳運雄	桃園吳家家系	桃園吳家家系	hasBrother
10410	10446	20535	20535	Undirected	吳佩映	吳孟原	桃園吳家家系	桃園吳家家系	hasBrother
10410	10592	20535	20535	Undirected	吳佩映	吳辛原	桃園吳家家系	桃園吳家家系	hasBrother
10411	10413	20095	20095	Undirected	吳俊傑	吳俊陞	吳修齊家系	吳修齊家系	hasBrother
10411	10415	20095	20095	Undirected	吳俊傑	吳修齊	吳修齊家系	吳修齊家系	hasBrother
10411	10455	20095	20095	Undirected	吳俊傑	吳尊賢	吳修齊家系	吳修齊家系	hasBrother
10412	10422	20094	20094	Undirected	吳俊民	吳凱民	吳三連家族	吳三連家族	hasBrother
10412	10469	20094	20094	Undirected	吳俊民	吳得民	吳三連家族	吳三連家族	hasBrother
10412	10531	20094	20094	Undirected	吳俊民	吳樹民	吳三連家族	吳三連家族	hasBrother
10412	10593	20094	20094	Undirected	吳俊民	吳逸民	吳三連家族	吳三連家族	hasBrother
10413	10415	20095	20095	Undirected	吳俊陞	吳修齊	吳修齊家系	吳修齊家系	hasBrother
10413	10455	20095	20095	Undirected	吳俊陞	吳尊賢	吳修齊家系	吳修齊家系	hasBrother
10414	10483	20535	20535	Undirected	吳俊雄	吳文光	桃園吳家家系	桃園吳家家系	hasBrother
10414	10486	20535	20535	Undirected	吳俊雄	吳文雄	桃園吳家家系	桃園吳家家系	hasBrother
10415	10455	20095	20095	Undirected	吳修齊	吳尊賢	吳修齊家系	吳修齊家系	hasBrother
10418	10421	20095	20095	Undirected	吳克明-1	吳克讀	吳修齊家系	吳修齊家系	hasBrother
10422	10469	20094	20094	Undirected	吳凱民	吳得民	吳三連家族	吳三連家族	hasBrother
10422	10531	20094	20094	Undirected	吳凱民	吳樹民	吳三連家族	吳三連家族	hasBrother
10422	10593	20094	20094	Undirected	吳凱民	吳逸民	吳三連家族	吳三連家族	hasBrother
10423	10470	20535	20535	Undirected	吳卓映	吳德原	桃園吳家家系	桃園吳家家系	hasBrother
10430	10431	20128	20128	Undirected	吳天惠	吳天授	吳英彪家族	吳英彪家族	hasBrother
10430	10432	20128	20128	Undirected	吳天惠	吳天達	吳英彪家族	吳英彪家族	hasBrother
10431	10432	20128	20128	Undirected	吳天授	吳天達	吳英彪家族	吳英彪家族	hasBrother
10433	10515	20114	20114	Undirected	吳如幸	吳東憲	吳火獅家系	吳火獅家系	hasBrother
10433	10517	20114	20114	Undirected	吳如幸	吳東明	吳火獅家系	吳火獅家系	hasBrother
10433	10520	20114	20114	Undirected	吳如幸	吳東興	吳火獅家系	吳火獅家系	hasBrother
10434	10513	20114	20114	Undirected	吳如月	吳東亮	吳火獅家系	吳火獅家系	hasBrother
10434	10516	20114	20114	Undirected	吳如月	吳東昇	吳火獅家系	吳火獅家系	hasBrother
10434	10521	20114	20114	Undirected	吳如月	吳東賢	吳火獅家系	吳火獅家系	hasBrother
10434	10522	20114	20114	Undirected	吳如月	吳東進	吳火獅家系	吳火獅家系	hasBrother
10435	10515	20114	20114	Undirected	吳如淑	吳東憲	吳火獅家系	吳火獅家系	hasBrother
10435	10517	20114	20114	Undirected	吳如淑	吳東明	吳火獅家系	吳火獅家系	hasBrother
10435	10520	20114	20114	Undirected	吳如淑	吳東興	吳火獅家系	吳火獅家系	hasBrother
10436	10514	20114	20114	Undirected	吳如淳	吳東勝	吳火獅家系	吳火獅家系	hasBrother
10436	10518	20114	20114	Undirected	吳如淳	吳東權	吳火獅家系	吳火獅家系	hasBrother
10436	10519	20114	20114	Undirected	吳如淳	吳東泰	吳火獅家系	吳火獅家系	hasBrother
10437	10442	20095	20095	Undirected	吳如玉	吳威德	吳修齊家系	吳修齊家系	hasBrother
10437	10461	20095	20095	Undirected	吳如玉	吳平原	吳修齊家系	吳修齊家系	hasBrother
10437	10462	20095	20095	Undirected	吳如玉	吳平治	吳修齊家系	吳修齊家系	hasBrother
10437	10466	20095	20095	Undirected	吳如玉	吳建德	吳修齊家系	吳修齊家系	hasBrother
10438	10514	20114	20114	Undirected	吳如真	吳東勝	吳火獅家系	吳火獅家系	hasBrother
10438	10518	20114	20114	Undirected	吳如真	吳東權	吳火獅家系	吳火獅家系	hasBrother
10438	10519	20114	20114	Undirected	吳如真	吳東泰	吳火獅家系	吳火獅家系	hasBrother
10439	10513	20114	20114	Undirected	吳如英	吳東亮	吳火獅家系	吳火獅家系	hasBrother
10439	10516	20114	20114	Undirected	吳如英	吳東昇	吳火獅家系	吳火獅家系	hasBrother
10439	10521	20114	20114	Undirected	吳如英	吳東賢	吳火獅家系	吳火獅家系	hasBrother
10439	10522	20114	20114	Undirected	吳如英	吳東進	吳火獅家系	吳火獅家系	hasBrother
10441	10405	20095	20095	Undirected	吳姿秀	吳亮宏	吳修齊家系	吳修齊家系	hasBrother
10441	10506	20095	20095	Undirected	吳姿秀	吳春甫	吳修齊家系	吳修齊家系	hasBrother
10441	10507	20095	20095	Undirected	吳姿秀	吳昭男	吳修齊家系	吳修齊家系	hasBrother
10441	10583	20095	20095	Undirected	吳姿秀	吳英辰	吳修齊家系	吳修齊家系	hasBrother
10441	10590	20095	20095	Undirected	吳姿秀	吳貞良	吳修齊家系	吳修齊家系	hasBrother
10442	10461	20095	20095	Undirected	吳威德	吳平原	吳修齊家系	吳修齊家系	hasBrother
10442	10462	20095	20095	Undirected	吳威德	吳平治	吳修齊家系	吳修齊家系	hasBrother
10442	10466	20095	20095	Undirected	吳威德	吳建德	吳修齊家系	吳修齊家系	hasBrother
10443	10442	20095	20095	Undirected	吳娟	吳威德	吳修齊家系	吳修齊家系	hasBrother
10443	10461	20095	20095	Undirected	吳娟	吳平原	吳修齊家系	吳修齊家系	hasBrother
10443	10462	20095	20095	Undirected	吳娟	吳平治	吳修齊家系	吳修齊家系	hasBrother
10443	10466	20095	20095	Undirected	吳娟	吳建德	吳修齊家系	吳修齊家系	hasBrother
10446	10592	20535	20535	Undirected	吳孟原	吳辛原	桃園吳家家系	桃園吳家家系	hasBrother
10447	10448	20123	20123	Undirected	吳守禮	吳守經	吳筱霞家族	吳筱霞家族	hasBrother
10450	10527	20535	20535	Undirected	吳定原	吳榮原	桃園吳家家系	桃園吳家家系	hasBrother
10450	10557	20535	20535	Undirected	吳定原	吳瑞原	桃園吳家家系	桃園吳家家系	hasBrother
10451	10471	20095	20095	Undirected	吳宛蓉	吳德暉	吳修齊家系	吳修齊家系	hasBrother
10454	10553	20114	20114	Undirected	吳寶珠	吳火獅	吳火獅家系	吳火獅家系	hasBrother
10454	10606	20114	20114	Undirected	吳寶珠	吳金虎	吳火獅家系	吳火獅家系	hasBrother
10454	10607	20114	20114	Undirected	吳寶珠	吳金龍	吳火獅家系	吳火獅家系	hasBrother
10456	10420	20095	20095	Undirected	吳對	吳克章	吳修齊家系	吳修齊家系	hasBrother
10457	10594	20535	20535	Undirected	吳小眉	吳運光	桃園吳家家系	桃園吳家家系	hasBrother
10457	10597	20535	20535	Undirected	吳小眉	吳運彰	桃園吳家家系	桃園吳家家系	hasBrother
10457	10599	20535	20535	Undirected	吳小眉	吳運東	桃園吳家家系	桃園吳家家系	hasBrother
10457	10600	20535	20535	Undirected	吳小眉	吳運豐	桃園吳家家系	桃園吳家家系	hasBrother
10459	10545	20095	20095	Undirected	吳崑崙	吳泉	吳修齊家系	吳修齊家系	hasBrother
10461	10462	20095	20095	Undirected	吳平原	吳平治	吳修齊家系	吳修齊家系	hasBrother
10461	10466	20095	20095	Undirected	吳平原	吳建德	吳修齊家系	吳修齊家系	hasBrother
10462	10466	20095	20095	Undirected	吳平治	吳建德	吳修齊家系	吳修齊家系	hasBrother
10463	10465	20134	20134	Undirected	吳幼林	吳幼良	吳鐵城家族	吳鐵城家族	hasBrother
10467	10534	20535	20535	Undirected	吳弘貴	吳正貴	桃園吳家家系	桃園吳家家系	hasBrother
10469	10531	20094	20094	Undirected	吳得民	吳樹民	吳三連家族	吳三連家族	hasBrother
10469	10593	20094	20094	Undirected	吳得民	吳逸民	吳三連家族	吳三連家族	hasBrother
10473	10477	20535	20535	Undirected	吳志偉	吳志良	桃園吳家家系	桃園吳家家系	hasBrother
10474	10476	20535	20535	Undirected	吳志剛	吳志揚	桃園吳家家系	桃園吳家家系	hasBrother
10478	10569	20095	20095	Undirected	吳怡萍	吳立仁	吳修齊家系	吳修齊家系	hasBrother
10479	10416	20095	20095	Undirected	吳怡蓮	吳元軒	吳修齊家系	吳修齊家系	hasBrother
10483	10486	20535	20535	Undirected	吳文光	吳文雄	桃園吳家家系	桃園吳家家系	hasBrother
10484	10539	20094	20094	Undirected	吳文慧	吳永嘉	吳三連家族	吳三連家族	hasBrother
10485	10537	20095	20095	Undirected	吳文文	吳永仁-1	吳修齊家系	吳修齊家系	hasBrother
10489	10542	20094	20094	Undirected	吳明慧	吳永熙	吳三連家族	吳三連家族	hasBrother
10490	10542	20094	20094	Undirected	吳明珣	吳永熙	吳三連家族	吳三連家族	hasBrother
10492	10541	20094	20094	Undirected	吳明華	吳永暉	吳三連家族	吳三連家族	hasBrother
10493	10501	20114	20114	Undirected	吳昕威	吳昕豪	吳火獅家系	吳火獅家系	hasBrother
10494	10496	20114	20114	Undirected	吳昕媛	吳昕恩	吳火獅家系	吳火獅家系	hasBrother
10494	10500	20114	20114	Undirected	吳昕媛	吳昕紘	吳火獅家系	吳火獅家系	hasBrother
10495	10498	20114	20114	Undirected	吳昕岳	吳昕杰	吳火獅家系	吳火獅家系	hasBrother
10496	10500	20114	20114	Undirected	吳昕恩	吳昕紘	吳火獅家系	吳火獅家系	hasBrother
10497	10502	20114	20114	Undirected	吳昕昌	吳昕達	吳火獅家系	吳火獅家系	hasBrother
10497	10503	20114	20114	Undirected	吳昕昌	吳昕陽	吳火獅家系	吳火獅家系	hasBrother
10502	10503	20114	20114	Undirected	吳昕達	吳昕陽	吳火獅家系	吳火獅家系	hasBrother
10504	10553	20114	20114	Undirected	吳映	吳火獅	吳火獅家系	吳火獅家系	hasBrother
10504	10606	20114	20114	Undirected	吳映	吳金虎	吳火獅家系	吳火獅家系	hasBrother
10504	10607	20114	20114	Undirected	吳映	吳金龍	吳火獅家系	吳火獅家系	hasBrother
10506	10507	20095	20095	Undirected	吳春甫	吳昭男	吳修齊家系	吳修齊家系	hasBrother
10506	10583	20095	20095	Undirected	吳春甫	吳英辰	吳修齊家系	吳修齊家系	hasBrother
10506	10590	20095	20095	Undirected	吳春甫	吳貞良	吳修齊家系	吳修齊家系	hasBrother
10507	10583	20095	20095	Undirected	吳昭男	吳英辰	吳修齊家系	吳修齊家系	hasBrother
10507	10590	20095	20095	Undirected	吳昭男	吳貞良	吳修齊家系	吳修齊家系	hasBrother
10508	10535	20535	20535	Undirected	吳昭雄	吳武雄	桃園吳家家系	桃園吳家家系	hasBrother
10508	10598	20535	20535	Undirected	吳昭雄	吳運明	桃園吳家家系	桃園吳家家系	hasBrother
10509	10510	20122	20122	Undirected	吳景徽	吳景箕	吳秋菊家族	吳秋菊家族	hasBrother
10512	10594	20535	20535	Undirected	吳杏仙	吳運光	桃園吳家家系	桃園吳家家系	hasBrother
10512	10597	20535	20535	Undirected	吳杏仙	吳運彰	桃園吳家家系	桃園吳家家系	hasBrother
10512	10599	20535	20535	Undirected	吳杏仙	吳運東	桃園吳家家系	桃園吳家家系	hasBrother
10512	10600	20535	20535	Undirected	吳杏仙	吳運豐	桃園吳家家系	桃園吳家家系	hasBrother
10513	10516	20114	20114	Undirected	吳東亮	吳東昇	吳火獅家系	吳火獅家系	hasBrother
10513	10521	20114	20114	Undirected	吳東亮	吳東賢	吳火獅家系	吳火獅家系	hasBrother
10513	10522	20114	20114	Undirected	吳東亮	吳東進	吳火獅家系	吳火獅家系	hasBrother
10514	10518	20114	20114	Undirected	吳東勝	吳東權	吳火獅家系	吳火獅家系	hasBrother
10514	10519	20114	20114	Undirected	吳東勝	吳東泰	吳火獅家系	吳火獅家系	hasBrother
10515	10517	20114	20114	Undirected	吳東憲	吳東明	吳火獅家系	吳火獅家系	hasBrother
10515	10520	20114	20114	Undirected	吳東憲	吳東興	吳火獅家系	吳火獅家系	hasBrother
10516	10521	20114	20114	Undirected	吳東昇	吳東賢	吳火獅家系	吳火獅家系	hasBrother
10516	10522	20114	20114	Undirected	吳東昇	吳東進	吳火獅家系	吳火獅家系	hasBrother
10517	10520	20114	20114	Undirected	吳東明	吳東興	吳火獅家系	吳火獅家系	hasBrother
10518	10519	20114	20114	Undirected	吳東權	吳東泰	吳火獅家系	吳火獅家系	hasBrother
10521	10522	20114	20114	Undirected	吳東賢	吳東進	吳火獅家系	吳火獅家系	hasBrother
10523	10553	20114	20114	Undirected	吳柚柑	吳火獅	吳火獅家系	吳火獅家系	hasBrother
10523	10606	20114	20114	Undirected	吳柚柑	吳金虎	吳火獅家系	吳火獅家系	hasBrother
10523	10607	20114	20114	Undirected	吳柚柑	吳金龍	吳火獅家系	吳火獅家系	hasBrother
10524	10594	20535	20535	Undirected	吳梅芬	吳運光	桃園吳家家系	桃園吳家家系	hasBrother
10524	10597	20535	20535	Undirected	吳梅芬	吳運彰	桃園吳家家系	桃園吳家家系	hasBrother
10524	10599	20535	20535	Undirected	吳梅芬	吳運東	桃園吳家家系	桃園吳家家系	hasBrother
10524	10600	20535	20535	Undirected	吳梅芬	吳運豐	桃園吳家家系	桃園吳家家系	hasBrother
10525	10551	20102	20102	Undirected	吳森森	吳源源	吳尚震家族	吳尚震家族	hasBrother
10526	10447	20123	20123	Undirected	吳楚蘋	吳守禮	吳筱霞家族	吳筱霞家族	hasBrother
10526	10448	20123	20123	Undirected	吳楚蘋	吳守經	吳筱霞家族	吳筱霞家族	hasBrother
10527	10557	20535	20535	Undirected	吳榮原	吳瑞原	桃園吳家家系	桃園吳家家系	hasBrother
10531	10593	20094	20094	Undirected	吳樹民	吳逸民	吳三連家族	吳三連家族	hasBrother
10532	10499	20114	20114	Undirected	吳欣儒	吳昕東	吳火獅家系	吳火獅家系	hasBrother
10533	10499	20114	20114	Undirected	吳欣盈	吳昕東	吳火獅家系	吳火獅家系	hasBrother
10535	10598	20535	20535	Undirected	吳武雄	吳運明	桃園吳家家系	桃園吳家家系	hasBrother
10536	10538	20094	20094	Undirected	吳永仁	吳永光	吳三連家族	吳三連家族	hasBrother
10536	10540	20094	20094	Undirected	吳永仁	吳永平	吳三連家族	吳三連家族	hasBrother
10538	10540	20094	20094	Undirected	吳永光	吳永平	吳三連家族	吳三連家族	hasBrother
10546	10442	20095	20095	Undirected	吳淑女	吳威德	吳修齊家系	吳修齊家系	hasBrother
10546	10461	20095	20095	Undirected	吳淑女	吳平原	吳修齊家系	吳修齊家系	hasBrother
10546	10462	20095	20095	Undirected	吳淑女	吳平治	吳修齊家系	吳修齊家系	hasBrother
10546	10466	20095	20095	Undirected	吳淑女	吳建德	吳修齊家系	吳修齊家系	hasBrother
10549	10442	20095	20095	Undirected	吳清美	吳威德	吳修齊家系	吳修齊家系	hasBrother
10549	10461	20095	20095	Undirected	吳清美	吳平原	吳修齊家系	吳修齊家系	hasBrother
10549	10462	20095	20095	Undirected	吳清美	吳平治	吳修齊家系	吳修齊家系	hasBrother
10549	10466	20095	20095	Undirected	吳清美	吳建德	吳修齊家系	吳修齊家系	hasBrother
10550	10447	20123	20123	Undirected	吳湘蘋	吳守禮	吳筱霞家族	吳筱霞家族	hasBrother
10550	10448	20123	20123	Undirected	吳湘蘋	吳守經	吳筱霞家族	吳筱霞家族	hasBrother
10553	10606	20114	20114	Undirected	吳火獅	吳金虎	吳火獅家系	吳火獅家系	hasBrother
10553	10607	20114	20114	Undirected	吳火獅	吳金龍	吳火獅家系	吳火獅家系	hasBrother
10554	10514	20114	20114	Undirected	吳玥玢	吳東勝	吳火獅家系	吳火獅家系	hasBrother
10554	10518	20114	20114	Undirected	吳玥玢	吳東權	吳火獅家系	吳火獅家系	hasBrother
10554	10519	20114	20114	Undirected	吳玥玢	吳東泰	吳火獅家系	吳火獅家系	hasBrother
10558	10403	20535	20535	Undirected	吳瑞枝	吳世雄	桃園吳家家系	桃園吳家家系	hasBrother
10558	10409	20535	20535	Undirected	吳瑞枝	吳伯雄	桃園吳家家系	桃園吳家家系	hasBrother
10558	10601	20535	20535	Undirected	吳瑞枝	吳運雄	桃園吳家家系	桃園吳家家系	hasBrother
10559	10514	20114	20114	Undirected	吳瑞美	吳東勝	吳火獅家系	吳火獅家系	hasBrother
10559	10518	20114	20114	Undirected	吳瑞美	吳東權	吳火獅家系	吳火獅家系	hasBrother
10559	10519	20114	20114	Undirected	吳瑞美	吳東泰	吳火獅家系	吳火獅家系	hasBrother
10561	10474	20535	20535	Undirected	吳璧玲	吳志剛	桃園吳家家系	桃園吳家家系	hasBrother
10561	10476	20535	20535	Undirected	吳璧玲	吳志揚	桃園吳家家系	桃園吳家家系	hasBrother
10562	10596	20535	20535	Undirected	吳白光	吳運嘉	桃園吳家家系	桃園吳家家系	hasBrother
10562	10602	20535	20535	Undirected	吳白光	吳郁夫	桃園吳家家系	桃園吳家家系	hasBrother
10572	10411	20095	20095	Undirected	吳素娥	吳俊傑	吳修齊家系	吳修齊家系	hasBrother
10572	10413	20095	20095	Undirected	吳素娥	吳俊陞	吳修齊家系	吳修齊家系	hasBrother
10572	10415	20095	20095	Undirected	吳素娥	吳修齊	吳修齊家系	吳修齊家系	hasBrother
10572	10455	20095	20095	Undirected	吳素娥	吳尊賢	吳修齊家系	吳修齊家系	hasBrother
10573	10449	20535	20535	Undirected	吳美映	吳宗原	桃園吳家家系	桃園吳家家系	hasBrother
10578	10403	20535	20535	Undirected	吳芳英	吳世雄	桃園吳家家系	桃園吳家家系	hasBrother
10578	10409	20535	20535	Undirected	吳芳英	吳伯雄	桃園吳家家系	桃園吳家家系	hasBrother
10578	10601	20535	20535	Undirected	吳芳英	吳運雄	桃園吳家家系	桃園吳家家系	hasBrother
10579	10416	20095	20095	Undirected	吳若璋	吳元軒	吳修齊家系	吳修齊家系	hasBrother
10583	10590	20095	20095	Undirected	吳英辰	吳貞良	吳修齊家系	吳修齊家系	hasBrother
10587	10594	20535	20535	Undirected	吳蘭芬	吳運光	桃園吳家家系	桃園吳家家系	hasBrother
10587	10597	20535	20535	Undirected	吳蘭芬	吳運彰	桃園吳家家系	桃園吳家家系	hasBrother
10587	10599	20535	20535	Undirected	吳蘭芬	吳運東	桃園吳家家系	桃園吳家家系	hasBrother
10587	10600	20535	20535	Undirected	吳蘭芬	吳運豐	桃園吳家家系	桃園吳家家系	hasBrother
10588	10594	20535	20535	Undirected	吳蘭英	吳運光	桃園吳家家系	桃園吳家家系	hasBrother
10588	10597	20535	20535	Undirected	吳蘭英	吳運彰	桃園吳家家系	桃園吳家家系	hasBrother
10588	10599	20535	20535	Undirected	吳蘭英	吳運東	桃園吳家家系	桃園吳家家系	hasBrother
10588	10600	20535	20535	Undirected	吳蘭英	吳運豐	桃園吳家家系	桃園吳家家系	hasBrother
10594	10597	20535	20535	Undirected	吳運光	吳運彰	桃園吳家家系	桃園吳家家系	hasBrother
10594	10599	20535	20535	Undirected	吳運光	吳運東	桃園吳家家系	桃園吳家家系	hasBrother
10594	10600	20535	20535	Undirected	吳運光	吳運豐	桃園吳家家系	桃園吳家家系	hasBrother
10596	10602	20535	20535	Undirected	吳運嘉	吳郁夫	桃園吳家家系	桃園吳家家系	hasBrother
10597	10599	20535	20535	Undirected	吳運彰	吳運東	桃園吳家家系	桃園吳家家系	hasBrother
10597	10600	20535	20535	Undirected	吳運彰	吳運豐	桃園吳家家系	桃園吳家家系	hasBrother
10599	10600	20535	20535	Undirected	吳運東	吳運豐	桃園吳家家系	桃園吳家家系	hasBrother
10605	10411	20095	20095	Undirected	吳金棗	吳俊傑	吳修齊家系	吳修齊家系	hasBrother
10605	10413	20095	20095	Undirected	吳金棗	吳俊陞	吳修齊家系	吳修齊家系	hasBrother
10605	10415	20095	20095	Undirected	吳金棗	吳修齊	吳修齊家系	吳修齊家系	hasBrother
10605	10455	20095	20095	Undirected	吳金棗	吳尊賢	吳修齊家系	吳修齊家系	hasBrother
10606	10607	20114	20114	Undirected	吳金虎	吳金龍	吳火獅家系	吳火獅家系	hasBrother
10613	10468	20095	20095	Undirected	吳雅婷	吳得佑	吳修齊家系	吳修齊家系	hasBrother
10614	10585	20094	20094	Undirected	吳雪倫	吳華倫	吳三連家族	吳三連家族	hasBrother
10615	10403	20535	20535	Undirected	吳雪梅	吳世雄	桃園吳家家系	桃園吳家家系	hasBrother
10615	10409	20535	20535	Undirected	吳雪梅	吳伯雄	桃園吳家家系	桃園吳家家系	hasBrother
10615	10601	20535	20535	Undirected	吳雪梅	吳運雄	桃園吳家家系	桃園吳家家系	hasBrother
10616	10537	20095	20095	Undirected	吳青青	吳永仁-1	吳修齊家系	吳修齊家系	hasBrother
10617	10488	20126	20126	Undirected	吳韻宜	吳昌明	吳芝生家族	吳芝生家族	hasBrother
10618	10619	20105	20105	Undirected	吳餘次郎	吳餘礦	吳慶樂家族	吳慶樂家族	hasBrother
10620	10621	20535	20535	Undirected	吳鴻勳	吳鴻森	桃園吳家家系	桃園吳家家系	hasBrother
10620	10622	20535	20535	Undirected	吳鴻勳	吳鴻烹	桃園吳家家系	桃園吳家家系	hasBrother
10620	10623	20535	20535	Undirected	吳鴻勳	吳鴻煎	桃園吳家家系	桃園吳家家系	hasBrother
10620	10624	20535	20535	Undirected	吳鴻勳	吳鴻爐	桃園吳家家系	桃園吳家家系	hasBrother
10620	10625	20535	20535	Undirected	吳鴻勳	吳鴻蒸	桃園吳家家系	桃園吳家家系	hasBrother
10620	10626	20535	20535	Undirected	吳鴻勳	吳鴻麒	桃園吳家家系	桃園吳家家系	hasBrother
10620	10627	20535	20535	Undirected	吳鴻勳	吳鴻麟	桃園吳家家系	桃園吳家家系	hasBrother
10621	10622	20535	20535	Undirected	吳鴻森	吳鴻烹	桃園吳家家系	桃園吳家家系	hasBrother
10621	10623	20535	20535	Undirected	吳鴻森	吳鴻煎	桃園吳家家系	桃園吳家家系	hasBrother
10621	10624	20535	20535	Undirected	吳鴻森	吳鴻爐	桃園吳家家系	桃園吳家家系	hasBrother
10621	10625	20535	20535	Undirected	吳鴻森	吳鴻蒸	桃園吳家家系	桃園吳家家系	hasBrother
10621	10626	20535	20535	Undirected	吳鴻森	吳鴻麒	桃園吳家家系	桃園吳家家系	hasBrother
10621	10627	20535	20535	Undirected	吳鴻森	吳鴻麟	桃園吳家家系	桃園吳家家系	hasBrother
10622	10623	20535	20535	Undirected	吳鴻烹	吳鴻煎	桃園吳家家系	桃園吳家家系	hasBrother
10622	10624	20535	20535	Undirected	吳鴻烹	吳鴻爐	桃園吳家家系	桃園吳家家系	hasBrother
10622	10625	20535	20535	Undirected	吳鴻烹	吳鴻蒸	桃園吳家家系	桃園吳家家系	hasBrother
10622	10626	20535	20535	Undirected	吳鴻烹	吳鴻麒	桃園吳家家系	桃園吳家家系	hasBrother
10622	10627	20535	20535	Undirected	吳鴻烹	吳鴻麟	桃園吳家家系	桃園吳家家系	hasBrother
10623	10624	20535	20535	Undirected	吳鴻煎	吳鴻爐	桃園吳家家系	桃園吳家家系	hasBrother
10623	10625	20535	20535	Undirected	吳鴻煎	吳鴻蒸	桃園吳家家系	桃園吳家家系	hasBrother
10623	10626	20535	20535	Undirected	吳鴻煎	吳鴻麒	桃園吳家家系	桃園吳家家系	hasBrother
10623	10627	20535	20535	Undirected	吳鴻煎	吳鴻麟	桃園吳家家系	桃園吳家家系	hasBrother
10624	10625	20535	20535	Undirected	吳鴻爐	吳鴻蒸	桃園吳家家系	桃園吳家家系	hasBrother
10624	10626	20535	20535	Undirected	吳鴻爐	吳鴻麒	桃園吳家家系	桃園吳家家系	hasBrother
10624	10627	20535	20535	Undirected	吳鴻爐	吳鴻麟	桃園吳家家系	桃園吳家家系	hasBrother
10625	10626	20535	20535	Undirected	吳鴻蒸	吳鴻麒	桃園吳家家系	桃園吳家家系	hasBrother
10625	10627	20535	20535	Undirected	吳鴻蒸	吳鴻麟	桃園吳家家系	桃園吳家家系	hasBrother
10626	10627	20535	20535	Undirected	吳鴻麒	吳鴻麟	桃園吳家家系	桃園吳家家系	hasBrother
10629	10412	20094	20094	Undirected	吳黎雪	吳俊民	吳三連家族	吳三連家族	hasBrother
10629	10422	20094	20094	Undirected	吳黎雪	吳凱民	吳三連家族	吳三連家族	hasBrother
10629	10469	20094	20094	Undirected	吳黎雪	吳得民	吳三連家族	吳三連家族	hasBrother
10629	10531	20094	20094	Undirected	吳黎雪	吳樹民	吳三連家族	吳三連家族	hasBrother
10629	10593	20094	20094	Undirected	吳黎雪	吳逸民	吳三連家族	吳三連家族	hasBrother
10631	10632	20792	20792	Undirected	呂天欽	呂天爵	萬華呂家家系	萬華呂家家系	hasBrother
10634	10633	20139	20139	Undirected	呂忠苓	呂忠楠	呂有文家族	呂有文家族	hasBrother
10635	10633	20139	20139	Undirected	呂忠萍	呂忠楠	呂有文家族	呂有文家族	hasBrother
10636	10633	20139	20139	Undirected	呂忠薇	呂忠楠	呂有文家族	呂有文家族	hasBrother
10640	10651	20792	20792	Undirected	呂某	呂阿墉	萬華呂家家系	萬華呂家家系	hasBrother
10640	10652	20792	20792	Undirected	呂某	呂阿昌	萬華呂家家系	萬華呂家家系	hasBrother
10640	10653	20792	20792	Undirected	呂某	呂阿炯	萬華呂家家系	萬華呂家家系	hasBrother
10643	10631	20792	20792	Undirected	呂瓊玉	呂天欽	萬華呂家家系	萬華呂家家系	hasBrother
10643	10632	20792	20792	Undirected	呂瓊玉	呂天爵	萬華呂家家系	萬華呂家家系	hasBrother
10645	10631	20792	20792	Undirected	呂瓊珠	呂天欽	萬華呂家家系	萬華呂家家系	hasBrother
10645	10632	20792	20792	Undirected	呂瓊珠	呂天爵	萬華呂家家系	萬華呂家家系	hasBrother
10646	10631	20792	20792	Undirected	呂瓊琚	呂天欽	萬華呂家家系	萬華呂家家系	hasBrother
10646	10632	20792	20792	Undirected	呂瓊琚	呂天爵	萬華呂家家系	萬華呂家家系	hasBrother
10647	10631	20792	20792	Undirected	呂瓊瑤	呂天欽	萬華呂家家系	萬華呂家家系	hasBrother
10647	10632	20792	20792	Undirected	呂瓊瑤	呂天爵	萬華呂家家系	萬華呂家家系	hasBrother
10648	10631	20792	20792	Undirected	呂瓊芳	呂天欽	萬華呂家家系	萬華呂家家系	hasBrother
10648	10632	20792	20792	Undirected	呂瓊芳	呂天爵	萬華呂家家系	萬華呂家家系	hasBrother
10650	10631	20792	20792	Undirected	呂瓊華	呂天欽	萬華呂家家系	萬華呂家家系	hasBrother
10650	10632	20792	20792	Undirected	呂瓊華	呂天爵	萬華呂家家系	萬華呂家家系	hasBrother
10651	10652	20792	20792	Undirected	呂阿墉	呂阿昌	萬華呂家家系	萬華呂家家系	hasBrother
10651	10653	20792	20792	Undirected	呂阿墉	呂阿炯	萬華呂家家系	萬華呂家家系	hasBrother
10652	10653	20792	20792	Undirected	呂阿昌	呂阿炯	萬華呂家家系	萬華呂家家系	hasBrother
10657	10658	20162	20162	Undirected	周信義	周信雄	周陳玉樹家族	周陳玉樹家族	hasBrother
10657	10665	20162	20162	Undirected	周信義	周安雄	周陳玉樹家族	周陳玉樹家族	hasBrother
10658	10665	20162	20162	Undirected	周信雄	周安雄	周陳玉樹家族	周陳玉樹家族	hasBrother
10659	10677	21031	21031	Undirected	周傅芳	周正剛	金石堂周家家系	金石堂周家家系	hasBrother
10661	10659	21031	21031	Undirected	周和惠	周傅芳	金石堂周家家系	金石堂周家家系	hasBrother
10661	10677	21031	21031	Undirected	周和惠	周正剛	金石堂周家家系	金石堂周家家系	hasBrother
10662	10659	21031	21031	Undirected	周品慧	周傅芳	金石堂周家家系	金石堂周家家系	hasBrother
10662	10677	21031	21031	Undirected	周品慧	周正剛	金石堂周家家系	金石堂周家家系	hasBrother
10664	10670	20156	20156	Undirected	周婉華	周文平	周百鍊家系	周百鍊家系	hasBrother
10664	10673	20156	20156	Undirected	周婉華	周昇平	周百鍊家系	周百鍊家系	hasBrother
10664	10679	20156	20156	Undirected	周婉華	周法平	周百鍊家系	周百鍊家系	hasBrother
10666	10667	20155	20155	Undirected	周宗熙	周宗隆	周煥璋家族	周煥璋家族	hasBrother
10670	10673	20156	20156	Undirected	周文平	周昇平	周百鍊家系	周百鍊家系	hasBrother
10670	10679	20156	20156	Undirected	周文平	周法平	周百鍊家系	周百鍊家系	hasBrother
10673	10679	20156	20156	Undirected	周昇平	周法平	周百鍊家系	周百鍊家系	hasBrother
10682	10670	20156	20156	Undirected	周淑華	周文平	周百鍊家系	周百鍊家系	hasBrother
10682	10673	20156	20156	Undirected	周淑華	周昇平	周百鍊家系	周百鍊家系	hasBrother
10682	10679	20156	20156	Undirected	周淑華	周法平	周百鍊家系	周百鍊家系	hasBrother
10684	10700	20157	20157	Undirected	周玉禎	周英才	周碧家族	周碧家族	hasBrother
10685	10666	20155	20155	Undirected	周琪芬	周宗熙	周煥璋家族	周煥璋家族	hasBrother
10685	10667	20155	20155	Undirected	周琪芬	周宗隆	周煥璋家族	周煥璋家族	hasBrother
10686	10666	20155	20155	Undirected	周瑜芬	周宗熙	周煥璋家族	周煥璋家族	hasBrother
10686	10667	20155	20155	Undirected	周瑜芬	周宗隆	周煥璋家族	周煥璋家族	hasBrother
10687	10666	20155	20155	Undirected	周瑞芬	周宗熙	周煥璋家族	周煥璋家族	hasBrother
10687	10667	20155	20155	Undirected	周瑞芬	周宗隆	周煥璋家族	周煥璋家族	hasBrother
10688	10670	20156	20156	Undirected	周瓊華	周文平	周百鍊家系	周百鍊家系	hasBrother
10688	10673	20156	20156	Undirected	周瓊華	周昇平	周百鍊家系	周百鍊家系	hasBrother
10688	10679	20156	20156	Undirected	周瓊華	周法平	周百鍊家系	周百鍊家系	hasBrother
10691	10657	20162	20162	Undirected	周秀子	周信義	周陳玉樹家族	周陳玉樹家族	hasBrother
10691	10658	20162	20162	Undirected	周秀子	周信雄	周陳玉樹家族	周陳玉樹家族	hasBrother
10691	10665	20162	20162	Undirected	周秀子	周安雄	周陳玉樹家族	周陳玉樹家族	hasBrother
10694	10684	20157	20157	Undirected	周純如	周玉禎	周碧家族	周碧家族	hasBrother
10694	10700	20157	20157	Undirected	周純如	周英才	周碧家族	周碧家族	hasBrother
10695	10659	21031	21031	Undirected	周素慧	周傅芳	金石堂周家家系	金石堂周家家系	hasBrother
10695	10677	21031	21031	Undirected	周素慧	周正剛	金石堂周家家系	金石堂周家家系	hasBrother
10696	10670	20156	20156	Undirected	周素華	周文平	周百鍊家系	周百鍊家系	hasBrother
10696	10673	20156	20156	Undirected	周素華	周昇平	周百鍊家系	周百鍊家系	hasBrother
10696	10679	20156	20156	Undirected	周素華	周法平	周百鍊家系	周百鍊家系	hasBrother
10697	10670	20156	20156	Undirected	周絳華	周文平	周百鍊家系	周百鍊家系	hasBrother
10697	10673	20156	20156	Undirected	周絳華	周昇平	周百鍊家系	周百鍊家系	hasBrother
10697	10679	20156	20156	Undirected	周絳華	周法平	周百鍊家系	周百鍊家系	hasBrother
10699	10659	21031	21031	Undirected	周美慧	周傅芳	金石堂周家家系	金石堂周家家系	hasBrother
10699	10677	21031	21031	Undirected	周美慧	周正剛	金石堂周家家系	金石堂周家家系	hasBrother
10701	10689	20156	20156	Undirected	周豆粒	周百鍊	周百鍊家系	周百鍊家系	hasBrother
10703	10657	20162	20162	Undirected	周錦雲	周信義	周陳玉樹家族	周陳玉樹家族	hasBrother
10703	10658	20162	20162	Undirected	周錦雲	周信雄	周陳玉樹家族	周陳玉樹家族	hasBrother
10703	10665	20162	20162	Undirected	周錦雲	周安雄	周陳玉樹家族	周陳玉樹家族	hasBrother
10707	10710	20166	20166	Undirected	唐文元	唐漢元	唐縱家族	唐縱家族	hasBrother
10708	10715	20166	20166	Undirected	唐曉東	唐雪東	唐縱家族	唐縱家族	hasBrother
10708	10716	20166	20166	Undirected	唐曉東	唐震東	唐縱家族	唐縱家族	hasBrother
10709	10707	20166	20166	Undirected	唐桂芬	唐文元	唐縱家族	唐縱家族	hasBrother
10709	10710	20166	20166	Undirected	唐桂芬	唐漢元	唐縱家族	唐縱家族	hasBrother
10712	10708	20166	20166	Undirected	唐紀渝	唐曉東	唐縱家族	唐縱家族	hasBrother
10712	10715	20166	20166	Undirected	唐紀渝	唐雪東	唐縱家族	唐縱家族	hasBrother
10712	10716	20166	20166	Undirected	唐紀渝	唐震東	唐縱家族	唐縱家族	hasBrother
10715	10716	20166	20166	Undirected	唐雪東	唐震東	唐縱家族	唐縱家族	hasBrother
10717	10708	20166	20166	Undirected	唐馥華	唐曉東	唐縱家族	唐縱家族	hasBrother
10717	10715	20166	20166	Undirected	唐馥華	唐雪東	唐縱家族	唐縱家族	hasBrother
10717	10716	20166	20166	Undirected	唐馥華	唐震東	唐縱家族	唐縱家族	hasBrother
10721	10726	20172	20172	Undirected	嚴仲熊	嚴僑	嚴復家系	嚴復家系	hasBrother
10721	10727	20172	20172	Undirected	嚴仲熊	嚴僖	嚴復家系	嚴復家系	hasBrother
10724	10721	20172	20172	Undirected	嚴倬雲	嚴仲熊	嚴復家系	嚴復家系	hasBrother
10724	10726	20172	20172	Undirected	嚴倬雲	嚴僑	嚴復家系	嚴復家系	hasBrother
10724	10727	20172	20172	Undirected	嚴倬雲	嚴僖	嚴復家系	嚴復家系	hasBrother
10725	10721	20172	20172	Undirected	嚴停雲	嚴仲熊	嚴復家系	嚴復家系	hasBrother
10725	10726	20172	20172	Undirected	嚴停雲	嚴僑	嚴復家系	嚴復家系	hasBrother
10725	10727	20172	20172	Undirected	嚴停雲	嚴僖	嚴復家系	嚴復家系	hasBrother
10726	10727	20172	20172	Undirected	嚴僑	嚴僖	嚴復家系	嚴復家系	hasBrother
10730	10731	20172	20172	Undirected	嚴天心	嚴天立	嚴復家系	嚴復家系	hasBrother
10732	10731	20172	20172	Undirected	嚴天音	嚴天立	嚴復家系	嚴復家系	hasBrother
10733	10736	20172	20172	Undirected	嚴孝京	嚴孝武	嚴復家系	嚴復家系	hasBrother
10733	10738	20172	20172	Undirected	嚴孝京	嚴孝章	嚴復家系	嚴復家系	hasBrother
10733	10739	20172	20172	Undirected	嚴孝京	嚴孝裕	嚴復家系	嚴復家系	hasBrother
10733	10740	20172	20172	Undirected	嚴孝京	嚴孝誠	嚴復家系	嚴復家系	hasBrother
10734	10736	20172	20172	Undirected	嚴孝媛	嚴孝武	嚴復家系	嚴復家系	hasBrother
10734	10738	20172	20172	Undirected	嚴孝媛	嚴孝章	嚴復家系	嚴復家系	hasBrother
10734	10739	20172	20172	Undirected	嚴孝媛	嚴孝裕	嚴復家系	嚴復家系	hasBrother
10734	10740	20172	20172	Undirected	嚴孝媛	嚴孝誠	嚴復家系	嚴復家系	hasBrother
10736	10738	20172	20172	Undirected	嚴孝武	嚴孝章	嚴復家系	嚴復家系	hasBrother
10736	10739	20172	20172	Undirected	嚴孝武	嚴孝裕	嚴復家系	嚴復家系	hasBrother
10736	10740	20172	20172	Undirected	嚴孝武	嚴孝誠	嚴復家系	嚴復家系	hasBrother
10737	10736	20172	20172	Undirected	嚴孝秀	嚴孝武	嚴復家系	嚴復家系	hasBrother
10737	10738	20172	20172	Undirected	嚴孝秀	嚴孝章	嚴復家系	嚴復家系	hasBrother
10737	10739	20172	20172	Undirected	嚴孝秀	嚴孝裕	嚴復家系	嚴復家系	hasBrother
10737	10740	20172	20172	Undirected	嚴孝秀	嚴孝誠	嚴復家系	嚴復家系	hasBrother
10738	10735	20172	20172	Undirected	嚴孝章	嚴孝斌	嚴復家系	嚴復家系	hasBrother
10738	10739	20172	20172	Undirected	嚴孝章	嚴孝裕	嚴復家系	嚴復家系	hasBrother
10738	10740	20172	20172	Undirected	嚴孝章	嚴孝誠	嚴復家系	嚴復家系	hasBrother
10739	10740	20172	20172	Undirected	嚴孝裕	嚴孝誠	嚴復家系	嚴復家系	hasBrother
10741	10742	20171	20171	Undirected	嚴家宜	嚴家昌	嚴家淦家系	嚴家淦家系	hasBrother
10741	10743	20171	20171	Undirected	嚴家宜	嚴家淦	嚴家淦家系	嚴家淦家系	hasBrother
10741	10746	20171	20171	Undirected	嚴家宜	嚴家聲	嚴家淦家系	嚴家淦家系	hasBrother
10742	10743	20171	20171	Undirected	嚴家昌	嚴家淦	嚴家淦家系	嚴家淦家系	hasBrother
10742	10746	20171	20171	Undirected	嚴家昌	嚴家聲	嚴家淦家系	嚴家淦家系	hasBrother
10744	10742	20171	20171	Undirected	嚴家玉	嚴家昌	嚴家淦家系	嚴家淦家系	hasBrother
10744	10743	20171	20171	Undirected	嚴家玉	嚴家淦	嚴家淦家系	嚴家淦家系	hasBrother
10744	10746	20171	20171	Undirected	嚴家玉	嚴家聲	嚴家淦家系	嚴家淦家系	hasBrother
10745	10742	20171	20171	Undirected	嚴家珮	嚴家昌	嚴家淦家系	嚴家淦家系	hasBrother
10745	10743	20171	20171	Undirected	嚴家珮	嚴家淦	嚴家淦家系	嚴家淦家系	hasBrother
10745	10746	20171	20171	Undirected	嚴家珮	嚴家聲	嚴家淦家系	嚴家淦家系	hasBrother
10746	10743	20171	20171	Undirected	嚴家聲	嚴家淦	嚴家淦家系	嚴家淦家系	hasBrother
10750	10752	20171	20171	Undirected	嚴慶光	嚴慶棣	嚴家淦家系	嚴家淦家系	hasBrother
10750	10754	20171	20171	Undirected	嚴慶光	嚴慶炘	嚴家淦家系	嚴家淦家系	hasBrother
10751	10750	20171	20171	Undirected	嚴慶昭	嚴慶光	嚴家淦家系	嚴家淦家系	hasBrother
10751	10752	20171	20171	Undirected	嚴慶昭	嚴慶棣	嚴家淦家系	嚴家淦家系	hasBrother
10751	10754	20171	20171	Undirected	嚴慶昭	嚴慶炘	嚴家淦家系	嚴家淦家系	hasBrother
10752	10754	20171	20171	Undirected	嚴慶棣	嚴慶炘	嚴家淦家系	嚴家淦家系	hasBrother
10753	10750	20171	20171	Undirected	嚴慶楨	嚴慶光	嚴家淦家系	嚴家淦家系	hasBrother
10753	10752	20171	20171	Undirected	嚴慶楨	嚴慶棣	嚴家淦家系	嚴家淦家系	hasBrother
10753	10754	20171	20171	Undirected	嚴慶楨	嚴慶炘	嚴家淦家系	嚴家淦家系	hasBrother
10756	10757	20172	20172	Undirected	嚴方	嚴正	嚴復家系	嚴復家系	hasBrother
10761	10762	20172	20172	Undirected	嚴玷	嚴琥	嚴復家系	嚴復家系	hasBrother
10761	10764	20172	20172	Undirected	嚴玷	嚴璩	嚴復家系	嚴復家系	hasBrother
10761	10766	20172	20172	Undirected	嚴玷	嚴璿	嚴復家系	嚴復家系	hasBrother
10761	10768	20172	20172	Undirected	嚴玷	嚴瓛	嚴復家系	嚴復家系	hasBrother
10762	10764	20172	20172	Undirected	嚴琥	嚴璩	嚴復家系	嚴復家系	hasBrother
10762	10766	20172	20172	Undirected	嚴琥	嚴璿	嚴復家系	嚴復家系	hasBrother
10762	10768	20172	20172	Undirected	嚴琥	嚴瓛	嚴復家系	嚴復家系	hasBrother
10763	10761	20172	20172	Undirected	嚴璆	嚴玷	嚴復家系	嚴復家系	hasBrother
10763	10762	20172	20172	Undirected	嚴璆	嚴琥	嚴復家系	嚴復家系	hasBrother
10763	10764	20172	20172	Undirected	嚴璆	嚴璩	嚴復家系	嚴復家系	hasBrother
10763	10766	20172	20172	Undirected	嚴璆	嚴璿	嚴復家系	嚴復家系	hasBrother
10763	10768	20172	20172	Undirected	嚴璆	嚴瓛	嚴復家系	嚴復家系	hasBrother
10764	10766	20172	20172	Undirected	嚴璩	嚴璿	嚴復家系	嚴復家系	hasBrother
10764	10768	20172	20172	Undirected	嚴璩	嚴瓛	嚴復家系	嚴復家系	hasBrother
10765	10761	20172	20172	Undirected	嚴璸	嚴玷	嚴復家系	嚴復家系	hasBrother
10765	10762	20172	20172	Undirected	嚴璸	嚴琥	嚴復家系	嚴復家系	hasBrother
10765	10764	20172	20172	Undirected	嚴璸	嚴璩	嚴復家系	嚴復家系	hasBrother
10765	10766	20172	20172	Undirected	嚴璸	嚴璿	嚴復家系	嚴復家系	hasBrother
10765	10768	20172	20172	Undirected	嚴璸	嚴瓛	嚴復家系	嚴復家系	hasBrother
10766	10768	20172	20172	Undirected	嚴璿	嚴瓛	嚴復家系	嚴復家系	hasBrother
10767	10761	20172	20172	Undirected	嚴瓏	嚴玷	嚴復家系	嚴復家系	hasBrother
10767	10762	20172	20172	Undirected	嚴瓏	嚴琥	嚴復家系	嚴復家系	hasBrother
10767	10764	20172	20172	Undirected	嚴瓏	嚴璩	嚴復家系	嚴復家系	hasBrother
10767	10766	20172	20172	Undirected	嚴瓏	嚴璿	嚴復家系	嚴復家系	hasBrother
10767	10768	20172	20172	Undirected	嚴瓏	嚴瓛	嚴復家系	嚴復家系	hasBrother
10769	10729	20172	20172	Undirected	嚴茲為	嚴大為	嚴復家系	嚴復家系	hasBrother
10770	10757	20172	20172	Undirected	嚴諒	嚴正	嚴復家系	嚴復家系	hasBrother
10771	10773	20171	20171	Undirected	嚴雋同	嚴雋建	嚴家淦家系	嚴家淦家系	hasBrother
10771	10774	20171	20171	Undirected	嚴雋同	嚴雋森	嚴家淦家系	嚴家淦家系	hasBrother
10771	10775	20171	20171	Undirected	嚴雋同	嚴雋榮	嚴家淦家系	嚴家淦家系	hasBrother
10771	10776	20171	20171	Undirected	嚴雋同	嚴雋泰	嚴家淦家系	嚴家淦家系	hasBrother
10772	10771	20171	20171	Undirected	嚴雋安	嚴雋同	嚴家淦家系	嚴家淦家系	hasBrother
10772	10773	20171	20171	Undirected	嚴雋安	嚴雋建	嚴家淦家系	嚴家淦家系	hasBrother
10772	10774	20171	20171	Undirected	嚴雋安	嚴雋森	嚴家淦家系	嚴家淦家系	hasBrother
10772	10775	20171	20171	Undirected	嚴雋安	嚴雋榮	嚴家淦家系	嚴家淦家系	hasBrother
10772	10776	20171	20171	Undirected	嚴雋安	嚴雋泰	嚴家淦家系	嚴家淦家系	hasBrother
10773	10774	20171	20171	Undirected	嚴雋建	嚴雋森	嚴家淦家系	嚴家淦家系	hasBrother
10773	10775	20171	20171	Undirected	嚴雋建	嚴雋榮	嚴家淦家系	嚴家淦家系	hasBrother
10773	10776	20171	20171	Undirected	嚴雋建	嚴雋泰	嚴家淦家系	嚴家淦家系	hasBrother
10774	10775	20171	20171	Undirected	嚴雋森	嚴雋榮	嚴家淦家系	嚴家淦家系	hasBrother
10774	10776	20171	20171	Undirected	嚴雋森	嚴雋泰	嚴家淦家系	嚴家淦家系	hasBrother
10775	10776	20171	20171	Undirected	嚴雋榮	嚴雋泰	嚴家淦家系	嚴家淦家系	hasBrother
10777	10771	20171	20171	Undirected	嚴雋芸	嚴雋同	嚴家淦家系	嚴家淦家系	hasBrother
10777	10773	20171	20171	Undirected	嚴雋芸	嚴雋建	嚴家淦家系	嚴家淦家系	hasBrother
10777	10774	20171	20171	Undirected	嚴雋芸	嚴雋森	嚴家淦家系	嚴家淦家系	hasBrother
10777	10775	20171	20171	Undirected	嚴雋芸	嚴雋榮	嚴家淦家系	嚴家淦家系	hasBrother
10777	10776	20171	20171	Undirected	嚴雋芸	嚴雋泰	嚴家淦家系	嚴家淦家系	hasBrother
10779	10771	20171	20171	Undirected	嚴雋荃	嚴雋同	嚴家淦家系	嚴家淦家系	hasBrother
10779	10773	20171	20171	Undirected	嚴雋荃	嚴雋建	嚴家淦家系	嚴家淦家系	hasBrother
10779	10774	20171	20171	Undirected	嚴雋荃	嚴雋森	嚴家淦家系	嚴家淦家系	hasBrother
10779	10775	20171	20171	Undirected	嚴雋荃	嚴雋榮	嚴家淦家系	嚴家淦家系	hasBrother
10779	10776	20171	20171	Undirected	嚴雋荃	嚴雋泰	嚴家淦家系	嚴家淦家系	hasBrother
10780	10771	20171	20171	Undirected	嚴雋菊	嚴雋同	嚴家淦家系	嚴家淦家系	hasBrother
10780	10773	20171	20171	Undirected	嚴雋菊	嚴雋建	嚴家淦家系	嚴家淦家系	hasBrother
10780	10774	20171	20171	Undirected	嚴雋菊	嚴雋森	嚴家淦家系	嚴家淦家系	hasBrother
10780	10775	20171	20171	Undirected	嚴雋菊	嚴雋榮	嚴家淦家系	嚴家淦家系	hasBrother
10780	10776	20171	20171	Undirected	嚴雋菊	嚴雋泰	嚴家淦家系	嚴家淦家系	hasBrother
10781	10771	20171	20171	Undirected	嚴雋華	嚴雋同	嚴家淦家系	嚴家淦家系	hasBrother
10781	10773	20171	20171	Undirected	嚴雋華	嚴雋建	嚴家淦家系	嚴家淦家系	hasBrother
10781	10774	20171	20171	Undirected	嚴雋華	嚴雋森	嚴家淦家系	嚴家淦家系	hasBrother
10781	10775	20171	20171	Undirected	嚴雋華	嚴雋榮	嚴家淦家系	嚴家淦家系	hasBrother
10781	10776	20171	20171	Undirected	嚴雋華	嚴雋泰	嚴家淦家系	嚴家淦家系	hasBrother
10783	10761	20172	20172	Undirected	嚴頊	嚴玷	嚴復家系	嚴復家系	hasBrother
10783	10762	20172	20172	Undirected	嚴頊	嚴琥	嚴復家系	嚴復家系	hasBrother
10783	10764	20172	20172	Undirected	嚴頊	嚴璩	嚴復家系	嚴復家系	hasBrother
10783	10766	20172	20172	Undirected	嚴頊	嚴璿	嚴復家系	嚴復家系	hasBrother
10783	10768	20172	20172	Undirected	嚴頊	嚴瓛	嚴復家系	嚴復家系	hasBrother
10786	10792	20175	20175	Undirected	城九觀	城呆	城仲模家系	城仲模家系	hasBrother
10786	10798	20175	20175	Undirected	城九觀	城江海	城仲模家系	城仲模家系	hasBrother
10786	10799	20175	20175	Undirected	城九觀	城海瑞	城仲模家系	城仲模家系	hasBrother
10786	10811	20175	20175	Undirected	城九觀	城祈安	城仲模家系	城仲模家系	hasBrother
10786	10812	20175	20175	Undirected	城九觀	城祈福	城仲模家系	城仲模家系	hasBrother
10786	10819	20175	20175	Undirected	城九觀	城門	城仲模家系	城仲模家系	hasBrother
10787	10794	20175	20175	Undirected	城仲模	城忠志	城仲模家系	城仲模家系	hasBrother
10787	10797	20175	20175	Undirected	城仲模	城榮廷	城仲模家系	城仲模家系	hasBrother
10787	10802	20175	20175	Undirected	城仲模	城炳模	城仲模家系	城仲模家系	hasBrother
10787	10809	20175	20175	Undirected	城仲模	城益男	城仲模家系	城仲模家系	hasBrother
10788	10796	20175	20175	Undirected	城偉峻	城振銘	城仲模家系	城仲模家系	hasBrother
10789	10790	20175	20175	Undirected	城兆毅	城兆緯	城仲模家系	城仲模家系	hasBrother
10792	10798	20175	20175	Undirected	城呆	城江海	城仲模家系	城仲模家系	hasBrother
10792	10799	20175	20175	Undirected	城呆	城海瑞	城仲模家系	城仲模家系	hasBrother
10792	10811	20175	20175	Undirected	城呆	城祈安	城仲模家系	城仲模家系	hasBrother
10792	10812	20175	20175	Undirected	城呆	城祈福	城仲模家系	城仲模家系	hasBrother
10792	10819	20175	20175	Undirected	城呆	城門	城仲模家系	城仲模家系	hasBrother
10794	10797	20175	20175	Undirected	城忠志	城榮廷	城仲模家系	城仲模家系	hasBrother
10794	10802	20175	20175	Undirected	城忠志	城炳模	城仲模家系	城仲模家系	hasBrother
10794	10809	20175	20175	Undirected	城忠志	城益男	城仲模家系	城仲模家系	hasBrother
10795	10787	20175	20175	Undirected	城惠畹	城仲模	城仲模家系	城仲模家系	hasBrother
10795	10794	20175	20175	Undirected	城惠畹	城忠志	城仲模家系	城仲模家系	hasBrother
10795	10797	20175	20175	Undirected	城惠畹	城榮廷	城仲模家系	城仲模家系	hasBrother
10795	10802	20175	20175	Undirected	城惠畹	城炳模	城仲模家系	城仲模家系	hasBrother
10795	10809	20175	20175	Undirected	城惠畹	城益男	城仲模家系	城仲模家系	hasBrother
10797	10802	20175	20175	Undirected	城榮廷	城炳模	城仲模家系	城仲模家系	hasBrother
10797	10809	20175	20175	Undirected	城榮廷	城益男	城仲模家系	城仲模家系	hasBrother
10798	10799	20175	20175	Undirected	城江海	城海瑞	城仲模家系	城仲模家系	hasBrother
10798	10811	20175	20175	Undirected	城江海	城祈安	城仲模家系	城仲模家系	hasBrother
10798	10812	20175	20175	Undirected	城江海	城祈福	城仲模家系	城仲模家系	hasBrother
10798	10819	20175	20175	Undirected	城江海	城門	城仲模家系	城仲模家系	hasBrother
10799	10811	20175	20175	Undirected	城海瑞	城祈安	城仲模家系	城仲模家系	hasBrother
10799	10812	20175	20175	Undirected	城海瑞	城祈福	城仲模家系	城仲模家系	hasBrother
10799	10819	20175	20175	Undirected	城海瑞	城門	城仲模家系	城仲模家系	hasBrother
10800	10788	20175	20175	Undirected	城淑賢	城偉峻	城仲模家系	城仲模家系	hasBrother
10800	10796	20175	20175	Undirected	城淑賢	城振銘	城仲模家系	城仲模家系	hasBrother
10801	10788	20175	20175	Undirected	城滿惠	城偉峻	城仲模家系	城仲模家系	hasBrother
10801	10796	20175	20175	Undirected	城滿惠	城振銘	城仲模家系	城仲模家系	hasBrother
10802	10809	20175	20175	Undirected	城炳模	城益男	城仲模家系	城仲模家系	hasBrother
10803	10804	20175	20175	Undirected	城燦松	城燦桐	城仲模家系	城仲模家系	hasBrother
10803	10805	20175	20175	Undirected	城燦松	城燦樹	城仲模家系	城仲模家系	hasBrother
10803	10806	20175	20175	Undirected	城燦松	城燦煌	城仲模家系	城仲模家系	hasBrother
10803	10807	20175	20175	Undirected	城燦松	城燦鉎	城仲模家系	城仲模家系	hasBrother
10804	10805	20175	20175	Undirected	城燦桐	城燦樹	城仲模家系	城仲模家系	hasBrother
10804	10806	20175	20175	Undirected	城燦桐	城燦煌	城仲模家系	城仲模家系	hasBrother
10804	10807	20175	20175	Undirected	城燦桐	城燦鉎	城仲模家系	城仲模家系	hasBrother
10805	10806	20175	20175	Undirected	城燦樹	城燦煌	城仲模家系	城仲模家系	hasBrother
10805	10807	20175	20175	Undirected	城燦樹	城燦鉎	城仲模家系	城仲模家系	hasBrother
10807	10806	20175	20175	Undirected	城燦鉎	城燦煌	城仲模家系	城仲模家系	hasBrother
10808	10788	20175	20175	Undirected	城璧連	城偉峻	城仲模家系	城仲模家系	hasBrother
10808	10796	20175	20175	Undirected	城璧連	城振銘	城仲模家系	城仲模家系	hasBrother
10811	10812	20175	20175	Undirected	城祈安	城祈福	城仲模家系	城仲模家系	hasBrother
10811	10819	20175	20175	Undirected	城祈安	城門	城仲模家系	城仲模家系	hasBrother
10812	10819	20175	20175	Undirected	城祈福	城門	城仲模家系	城仲模家系	hasBrother
10813	10788	20175	20175	Undirected	城紫雲	城偉峻	城仲模家系	城仲模家系	hasBrother
10813	10796	20175	20175	Undirected	城紫雲	城振銘	城仲模家系	城仲模家系	hasBrother
10814	10817	20175	20175	Undirected	城罔治	城貴霖	城仲模家系	城仲模家系	hasBrother
10815	10788	20175	20175	Undirected	城翠吟	城偉峻	城仲模家系	城仲模家系	hasBrother
10815	10796	20175	20175	Undirected	城翠吟	城振銘	城仲模家系	城仲模家系	hasBrother
10816	10817	20175	20175	Undirected	城謹治	城貴霖	城仲模家系	城仲模家系	hasBrother
10818	10817	20175	20175	Undirected	城金	城貴霖	城仲模家系	城仲模家系	hasBrother
10821	10787	20175	20175	Undirected	城雅惠	城仲模	城仲模家系	城仲模家系	hasBrother
10821	10794	20175	20175	Undirected	城雅惠	城忠志	城仲模家系	城仲模家系	hasBrother
10821	10797	20175	20175	Undirected	城雅惠	城榮廷	城仲模家系	城仲模家系	hasBrother
10821	10802	20175	20175	Undirected	城雅惠	城炳模	城仲模家系	城仲模家系	hasBrother
10821	10809	20175	20175	Undirected	城雅惠	城益男	城仲模家系	城仲模家系	hasBrother
10822	10788	20175	20175	Undirected	城雅美	城偉峻	城仲模家系	城仲模家系	hasBrother
10822	10796	20175	20175	Undirected	城雅美	城振銘	城仲模家系	城仲模家系	hasBrother
10824	10825	20176	20176	Undirected	姚奇偉	姚奇凱	姚兆元家族	姚兆元家族	hasBrother
10827	10828	20178	20178	Undirected	姜文緇	姜文釗	姜紹謨家族	姜紹謨家族	hasBrother
10827	10830	20178	20178	Undirected	姜文緇	姜文鉞	姜紹謨家族	姜紹謨家族	hasBrother
10827	10832	20178	20178	Undirected	姜文緇	姜文銘	姜紹謨家族	姜紹謨家族	hasBrother
10827	10833	20178	20178	Undirected	姜文緇	姜文錦	姜紹謨家族	姜紹謨家族	hasBrother
10828	10830	20178	20178	Undirected	姜文釗	姜文鉞	姜紹謨家族	姜紹謨家族	hasBrother
10828	10832	20178	20178	Undirected	姜文釗	姜文銘	姜紹謨家族	姜紹謨家族	hasBrother
10828	10833	20178	20178	Undirected	姜文釗	姜文錦	姜紹謨家族	姜紹謨家族	hasBrother
10829	10828	20178	20178	Undirected	姜文鈞	姜文釗	姜紹謨家族	姜紹謨家族	hasBrother
10829	10830	20178	20178	Undirected	姜文鈞	姜文鉞	姜紹謨家族	姜紹謨家族	hasBrother
10829	10832	20178	20178	Undirected	姜文鈞	姜文銘	姜紹謨家族	姜紹謨家族	hasBrother
10829	10833	20178	20178	Undirected	姜文鈞	姜文錦	姜紹謨家族	姜紹謨家族	hasBrother
10830	10832	20178	20178	Undirected	姜文鉞	姜文銘	姜紹謨家族	姜紹謨家族	hasBrother
10830	10833	20178	20178	Undirected	姜文鉞	姜文錦	姜紹謨家族	姜紹謨家族	hasBrother
10831	10828	20178	20178	Undirected	姜文銖	姜文釗	姜紹謨家族	姜紹謨家族	hasBrother
10831	10830	20178	20178	Undirected	姜文銖	姜文鉞	姜紹謨家族	姜紹謨家族	hasBrother
10831	10832	20178	20178	Undirected	姜文銖	姜文銘	姜紹謨家族	姜紹謨家族	hasBrother
10831	10833	20178	20178	Undirected	姜文銖	姜文錦	姜紹謨家族	姜紹謨家族	hasBrother
10832	10833	20178	20178	Undirected	姜文銘	姜文錦	姜紹謨家族	姜紹謨家族	hasBrother
10836	10838	20180	20180	Undirected	孔令侃	孔令傑	孔祥熙家族	孔祥熙家族	hasBrother
10837	10836	20180	20180	Undirected	孔令偉	孔令侃	孔祥熙家族	孔祥熙家族	hasBrother
10837	10838	20180	20180	Undirected	孔令偉	孔令傑	孔祥熙家族	孔祥熙家族	hasBrother
10839	10836	20180	20180	Undirected	孔令儀	孔令侃	孔祥熙家族	孔祥熙家族	hasBrother
10839	10838	20180	20180	Undirected	孔令儀	孔令傑	孔祥熙家族	孔祥熙家族	hasBrother
10843	10853	20188	20188	Undirected	孫佩華	孫常勝	孫琴風家族	孫琴風家族	hasBrother
10844	10853	20188	20188	Undirected	孫冠華	孫常勝	孫琴風家族	孫琴風家族	hasBrother
10845	10847	20182	20182	Undirected	孫嘉琳	孫國元	孫大成家族	孫大成家族	hasBrother
10845	10848	20182	20182	Undirected	孫嘉琳	孫國升	孫大成家族	孫大成家族	hasBrother
10846	10847	20182	20182	Undirected	孫嘉瑜	孫國元	孫大成家族	孫大成家族	hasBrother
10846	10848	20182	20182	Undirected	孫嘉瑜	孫國升	孫大成家族	孫大成家族	hasBrother
10847	10848	20182	20182	Undirected	孫國元	孫國升	孫大成家族	孫大成家族	hasBrother
10850	10868	20182	20182	Undirected	孫娫	孫科	孫大成家族	孫大成家族	hasBrother
10851	10879	20182	20182	Undirected	孫學成	孫觀成	孫大成家族	孫大成家族	hasBrother
10851	10880	20182	20182	Undirected	孫學成	孫達成	孫大成家族	孫大成家族	hasBrother
10852	10882	20185	20185	Undirected	孫岱	孫黔	孫景華家族	孫景華家族	hasBrother
10854	10857	20182	20182	Undirected	孫德彰	孫文	孫大成家族	孫大成家族	hasBrother
10861	10866	20188	20188	Undirected	孫氏	孫琴風	孫琴風家族	孫琴風家族	hasBrother
10862	10863	20182	20182	Undirected	孫治平	孫治強	孫大成家族	孫大成家族	hasBrother
10865	10852	20185	20185	Undirected	孫玫兒	孫岱	孫景華家族	孫景華家族	hasBrother
10865	10882	20185	20185	Undirected	孫玫兒	孫黔	孫景華家族	孫景華家族	hasBrother
10867	10853	20188	20188	Undirected	孫璐華	孫常勝	孫琴風家族	孫琴風家族	hasBrother
10869	10862	20182	20182	Undirected	孫穗英	孫治平	孫大成家族	孫大成家族	hasBrother
10869	10863	20182	20182	Undirected	孫穗英	孫治強	孫大成家族	孫大成家族	hasBrother
10870	10862	20182	20182	Undirected	孫穗華	孫治平	孫大成家族	孫大成家族	hasBrother
10870	10863	20182	20182	Undirected	孫穗華	孫治強	孫大成家族	孫大成家族	hasBrother
10879	10880	20182	20182	Undirected	孫觀成	孫達成	孫大成家族	孫大成家族	hasBrother
10881	10868	20182	20182	Undirected	孫金琬	孫科	孫大成家族	孫大成家族	hasBrother
10884	10892	20200	20200	Undirected	宋壽壽	宋文彬	宋進英家族	宋進英家族	hasBrother
10884	10893	20200	20200	Undirected	宋壽壽	宋文恭	宋進英家族	宋進英家族	hasBrother
10884	10895	20200	20200	Undirected	宋壽壽	宋文雄	宋進英家族	宋進英家族	hasBrother
10885	10886	20199	20199	Undirected	宋子安	宋子文	宋美齡家系	宋美齡家系	hasBrother
10885	10887	20199	20199	Undirected	宋子安	宋子良	宋美齡家系	宋美齡家系	hasBrother
10886	10887	20199	20199	Undirected	宋子文	宋子良	宋美齡家系	宋美齡家系	hasBrother
10891	10885	20199	20199	Undirected	宋慶齡	宋子安	宋美齡家系	宋美齡家系	hasBrother
10891	10886	20199	20199	Undirected	宋慶齡	宋子文	宋美齡家系	宋美齡家系	hasBrother
10891	10887	20199	20199	Undirected	宋慶齡	宋子良	宋美齡家系	宋美齡家系	hasBrother
10892	10893	20200	20200	Undirected	宋文彬	宋文恭	宋進英家族	宋進英家族	hasBrother
10892	10895	20200	20200	Undirected	宋文彬	宋文雄	宋進英家族	宋進英家族	hasBrother
10893	10895	20200	20200	Undirected	宋文恭	宋文雄	宋進英家族	宋進英家族	hasBrother
10898	10899	20196	20196	Undirected	宋林香	宋漲林	宋式倉家族	宋式倉家族	hasBrother
10898	10900	20196	20196	Undirected	宋林香	宋漲生	宋式倉家族	宋式倉家族	hasBrother
10898	10903	20196	20196	Undirected	宋林香	宋祥生	宋式倉家族	宋式倉家族	hasBrother
10899	10900	20196	20196	Undirected	宋漲林	宋漲生	宋式倉家族	宋式倉家族	hasBrother
10899	10903	20196	20196	Undirected	宋漲林	宋祥生	宋式倉家族	宋式倉家族	hasBrother
10900	10903	20196	20196	Undirected	宋漲生	宋祥生	宋式倉家族	宋式倉家族	hasBrother
10904	10905	20195	20195	Undirected	宋維修	宋維坤	宋孟果家族	宋孟果家族	hasBrother
10904	10906	20195	20195	Undirected	宋維修	宋維堯	宋孟果家族	宋孟果家族	hasBrother
10905	10906	20195	20195	Undirected	宋維坤	宋維堯	宋孟果家族	宋孟果家族	hasBrother
10908	10885	20199	20199	Undirected	宋美齡	宋子安	宋美齡家系	宋美齡家系	hasBrother
10908	10886	20199	20199	Undirected	宋美齡	宋子文	宋美齡家系	宋美齡家系	hasBrother
10908	10887	20199	20199	Undirected	宋美齡	宋子良	宋美齡家系	宋美齡家系	hasBrother
10911	10885	20199	20199	Undirected	宋藹齡	宋子安	宋美齡家系	宋美齡家系	hasBrother
10911	10886	20199	20199	Undirected	宋藹齡	宋子文	宋美齡家系	宋美齡家系	hasBrother
10911	10887	20199	20199	Undirected	宋藹齡	宋子良	宋美齡家系	宋美齡家系	hasBrother
10912	10892	20200	20200	Undirected	宋貞貞	宋文彬	宋進英家族	宋進英家族	hasBrother
10912	10893	20200	20200	Undirected	宋貞貞	宋文恭	宋進英家族	宋進英家族	hasBrother
10912	10895	20200	20200	Undirected	宋貞貞	宋文雄	宋進英家族	宋進英家族	hasBrother
10921	10924	20208	20208	Undirected	居定賢	居正	居定賢家族	居定賢家族	hasBrother
10923	10928	20208	20208	Undirected	居桂平	居禮	居定賢家族	居定賢家族	hasBrother
10923	10929	20208	20208	Undirected	居桂平	居簡	居定賢家族	居定賢家族	hasBrother
10923	10932	20208	20208	Undirected	居桂平	居龍	居定賢家族	居定賢家族	hasBrother
10926	10925	20208	20208	Undirected	居瀛玖	居浩然	居定賢家族	居定賢家族	hasBrother
10927	10922	20208	20208	Undirected	居玟	居文	居定賢家族	居定賢家族	hasBrother
10928	10929	20208	20208	Undirected	居禮	居簡	居定賢家族	居定賢家族	hasBrother
10928	10932	20208	20208	Undirected	居禮	居龍	居定賢家族	居定賢家族	hasBrother
10929	10932	20208	20208	Undirected	居簡	居龍	居定賢家族	居定賢家族	hasBrother
10930	10922	20208	20208	Undirected	居美	居文	居定賢家族	居定賢家族	hasBrother
10931	10922	20208	20208	Undirected	居蜜	居文	居定賢家族	居定賢家族	hasBrother
10942	10941	20216	20216	Undirected	席裕英	席裕強	席鑑庭家族	席鑑庭家族	hasBrother
10948	10951	20220	20222	Undirected	廖文毅	廖溫進	廖文毅家族	廖溫進家族	hasBrother
10949	11733	20454	20454	Undirected	廖景福	林恆生	林恆生家族	林恆生家族	hasBrother
10949	12081	20454	20454	Undirected	廖景福	林英生	林恆生家族	林恆生家族	hasBrother
10949	12164	20454	20454	Undirected	廖景福	林道生	林恆生家族	林恆生家族	hasBrother
10953	10948	20644	20220	Undirected	廖玉霜	廖文毅	清水蔡惠如家系	廖文毅家族	hasBrother
10957	10958	20228	20228	Undirected	張世昌	張世杰	張園家族	張園家族	hasBrother
10957	10959	20228	20228	Undirected	張世昌	張丞模	張園家族	張園家族	hasBrother
10958	10959	20228	20228	Undirected	張世杰	張丞模	張園家族	張園家族	hasBrother
10960	10989	20242	20242	Undirected	張仙平	張安平	張敏鈺家族	張敏鈺家族	hasBrother
10960	11042	20242	20242	Undirected	張仙平	張東平	張敏鈺家族	張敏鈺家族	hasBrother
10960	11056	20242	20242	Undirected	張仙平	張永平	張敏鈺家族	張敏鈺家族	hasBrother
10961	10987	20232	20232	Undirected	張令達	張孝威	張子武家族	張子武家族	hasBrother
10961	11023	20232	20232	Undirected	張令達	張愛倫	張子武家族	張子武家族	hasBrother
10964	10965	20300	20300	Undirected	張伯甫	張伯翔	彰化銀行張伯欣家系	彰化銀行張伯欣家系	hasBrother
10964	10966	20300	20300	Undirected	張伯甫	張伯誠	彰化銀行張伯欣家系	彰化銀行張伯欣家系	hasBrother
10965	10966	20300	20300	Undirected	張伯翔	張伯誠	彰化銀行張伯欣家系	彰化銀行張伯欣家系	hasBrother
10970	11109	20282	20282	Undirected	張可欣	張華欣	張豐緒家系	張豐緒家系	hasBrother
10972	10976	20268	20268	Undirected	張君勳	張嘉璈	張祖澤家族	張祖澤家族	hasBrother
10973	11060	20300	20300	Undirected	張品三	張漢三	彰化銀行張伯欣家系	彰化銀行張伯欣家系	hasBrother
10973	11064	20300	20300	Undirected	張品三	張煥三	彰化銀行張伯欣家系	彰化銀行張伯欣家系	hasBrother
10973	11101	20300	20300	Undirected	張品三	張聘三	彰化銀行張伯欣家系	彰化銀行張伯欣家系	hasBrother
10973	11119	20300	20300	Undirected	張品三	張達三	彰化銀行張伯欣家系	彰化銀行張伯欣家系	hasBrother
10974	10993	20284	20284	Undirected	張品莊	張家信	張邦翰家族	張邦翰家族	hasBrother
10974	10995	20284	20284	Undirected	張品莊	張家寬	張邦翰家族	張邦翰家族	hasBrother
10974	10996	20284	20284	Undirected	張品莊	張家恭	張邦翰家族	張邦翰家族	hasBrother
10974	10997	20284	20284	Undirected	張品莊	張家敏	張邦翰家族	張邦翰家族	hasBrother
10980	10989	20242	20242	Undirected	張如平	張安平	張敏鈺家族	張敏鈺家族	hasBrother
10980	11042	20242	20242	Undirected	張如平	張東平	張敏鈺家族	張敏鈺家族	hasBrother
10980	11056	20242	20242	Undirected	張如平	張永平	張敏鈺家族	張敏鈺家族	hasBrother
10981	11114	20282	20282	Undirected	張妏	張豐彥	張豐緒家系	張豐緒家系	hasBrother
10981	11115	20282	20282	Undirected	張妏	張豐緒	張豐緒家系	張豐緒家系	hasBrother
10981	11116	20282	20282	Undirected	張妏	張豐胤	張豐緒家系	張豐緒家系	hasBrother
10983	11114	20282	20282	Undirected	張媞	張豐彥	張豐緒家系	張豐緒家系	hasBrother
10983	11115	20282	20282	Undirected	張媞	張豐緒	張豐緒家系	張豐緒家系	hasBrother
10983	11116	20282	20282	Undirected	張媞	張豐胤	張豐緒家系	張豐緒家系	hasBrother
10987	11023	20232	20232	Undirected	張孝威	張愛倫	張子武家族	張子武家族	hasBrother
10989	11042	20242	20242	Undirected	張安平	張東平	張敏鈺家族	張敏鈺家族	hasBrother
10989	11056	20242	20242	Undirected	張安平	張永平	張敏鈺家族	張敏鈺家族	hasBrother
10990	10991	20300	20300	Undirected	張定民	張定立	彰化銀行張伯欣家系	彰化銀行張伯欣家系	hasBrother
10993	10995	20284	20284	Undirected	張家信	張家寬	張邦翰家族	張邦翰家族	hasBrother
10993	10996	20284	20284	Undirected	張家信	張家恭	張邦翰家族	張邦翰家族	hasBrother
10993	10997	20284	20284	Undirected	張家信	張家敏	張邦翰家族	張邦翰家族	hasBrother
10995	10996	20284	20284	Undirected	張家寬	張家恭	張邦翰家族	張邦翰家族	hasBrother
10995	10997	20284	20284	Undirected	張家寬	張家敏	張邦翰家族	張邦翰家族	hasBrother
10996	10997	20284	20284	Undirected	張家恭	張家敏	張邦翰家族	張邦翰家族	hasBrother
11001	10989	20242	20242	Undirected	張小平	張安平	張敏鈺家族	張敏鈺家族	hasBrother
11001	11042	20242	20242	Undirected	張小平	張東平	張敏鈺家族	張敏鈺家族	hasBrother
11001	11056	20242	20242	Undirected	張小平	張永平	張敏鈺家族	張敏鈺家族	hasBrother
11003	11109	20282	20282	Undirected	張嵐欣	張華欣	張豐緒家系	張豐緒家系	hasBrother
11004	10972	20268	20268	Undirected	張幼俄	張君勳	張祖澤家族	張祖澤家族	hasBrother
11004	10976	20268	20268	Undirected	張幼俄	張嘉璈	張祖澤家族	張祖澤家族	hasBrother
11005	11008	20238	20238	Undirected	張建國	張建邦	張建邦家系	張建邦家系	hasBrother
11009	11096	20259	20259	Undirected	張式真	張耀京	張煥珪家族	張煥珪家族	hasBrother
11009	11097	20259	20259	Undirected	張式真	張耀西	張煥珪家族	張煥珪家族	hasBrother
11009	11098	20259	20259	Undirected	張式真	張耀鋒	張煥珪家族	張煥珪家族	hasBrother
11009	11099	20259	20259	Undirected	張式真	張耀錡	張煥珪家族	張煥珪家族	hasBrother
11009	11100	20259	20259	Undirected	張式真	張耀龍	張煥珪家族	張煥珪家族	hasBrother
11012	11013	20232	20232	Undirected	張心治	張心洽	張子武家族	張子武家族	hasBrother
11014	11012	20232	20232	Undirected	張心滄	張心治	張子武家族	張子武家族	hasBrother
11014	11013	20232	20232	Undirected	張心滄	張心洽	張子武家族	張子武家族	hasBrother
11015	11012	20232	20232	Undirected	張心漪	張心治	張子武家族	張子武家族	hasBrother
11015	11013	20232	20232	Undirected	張心漪	張心洽	張子武家族	張子武家族	hasBrother
11016	11012	20232	20232	Undirected	張心澹	張心治	張子武家族	張子武家族	hasBrother
11016	11013	20232	20232	Undirected	張心澹	張心洽	張子武家族	張子武家族	hasBrother
11017	11018	20227	20227	Undirected	張志偉	張志豪	張信雄家族	張信雄家族	hasBrother
11019	11020	20258	20258	Undirected	張恩堉	張恩榕	張炎虎家族	張炎虎家族	hasBrother
11019	11021	20258	20258	Undirected	張恩堉	張恩誠	張炎虎家族	張炎虎家族	hasBrother
11020	11021	20258	20258	Undirected	張恩榕	張恩誠	張炎虎家族	張炎虎家族	hasBrother
11022	10989	20242	20242	Undirected	張意平	張安平	張敏鈺家族	張敏鈺家族	hasBrother
11022	11042	20242	20242	Undirected	張意平	張東平	張敏鈺家族	張敏鈺家族	hasBrother
11022	11056	20242	20242	Undirected	張意平	張永平	張敏鈺家族	張敏鈺家族	hasBrother
11024	11025	20241	20241	Undirected	張慶輝	張慶鎮	張慶鎮家族	張慶鎮家族	hasBrother
11026	11027	20282	20282	Undirected	張敏洞	張敏璋	張豐緒家系	張豐緒家系	hasBrother
11026	11028	20282	20282	Undirected	張敏洞	張敏竑	張豐緒家系	張豐緒家系	hasBrother
11027	11028	20282	20282	Undirected	張敏璋	張敏竑	張豐緒家系	張豐緒家系	hasBrother
11030	10977	20268	20268	Undirected	張敦復	張國瀏	張祖澤家族	張祖澤家族	hasBrother
11031	10977	20268	20268	Undirected	張敦華	張國瀏	張祖澤家族	張祖澤家族	hasBrother
11041	10964	20300	20300	Undirected	張杏如	張伯甫	彰化銀行張伯欣家系	彰化銀行張伯欣家系	hasBrother
11041	10965	20300	20300	Undirected	張杏如	張伯翔	彰化銀行張伯欣家系	彰化銀行張伯欣家系	hasBrother
11041	10966	20300	20300	Undirected	張杏如	張伯誠	彰化銀行張伯欣家系	彰化銀行張伯欣家系	hasBrother
11042	11056	20242	20242	Undirected	張東平	張永平	張敏鈺家族	張敏鈺家族	hasBrother
11043	11044	20254	20254	Undirected	張東紅	張東華	張歐結家族	張歐結家族	hasBrother
11043	11045	20254	20254	Undirected	張東紅	張東青	張歐結家族	張歐結家族	hasBrother
11044	11045	20254	20254	Undirected	張東華	張東青	張歐結家族	張歐結家族	hasBrother
11052	10986	20284	20284	Undirected	張樂文	張孔穎	張邦翰家族	張邦翰家族	hasBrother
11053	10986	20284	20284	Undirected	張樂真	張孔穎	張邦翰家族	張邦翰家族	hasBrother
11060	11064	20300	20300	Undirected	張漢三	張煥三	彰化銀行張伯欣家系	彰化銀行張伯欣家系	hasBrother
11060	11101	20300	20300	Undirected	張漢三	張聘三	彰化銀行張伯欣家系	彰化銀行張伯欣家系	hasBrother
11060	11119	20300	20300	Undirected	張漢三	張達三	彰化銀行張伯欣家系	彰化銀行張伯欣家系	hasBrother
11064	11101	20300	20300	Undirected	張煥三	張聘三	彰化銀行張伯欣家系	彰化銀行張伯欣家系	hasBrother
11064	11119	20300	20300	Undirected	張煥三	張達三	彰化銀行張伯欣家系	彰化銀行張伯欣家系	hasBrother
11066	10975	20237	20237	Undirected	張照媛	張哲碩	張建祥家族	張建祥家族	hasBrother
11068	11081	20270	20270	Undirected	張燦堂	張福堂	張福堂家族	張福堂家族	hasBrother
11075	11083	20255	20255	Undirected	張益周	張秀政	張添根家族	張添根家族	hasBrother
11075	11084	20255	20255	Undirected	張益周	張秀青	張添根家族	張添根家族	hasBrother
11075	11130	20255	20255	Undirected	張益周	張雨田	張添根家族	張添根家族	hasBrother
11076	11026	20282	20282	Undirected	張知惠	張敏洞	張豐緒家系	張豐緒家系	hasBrother
11076	11027	20282	20282	Undirected	張知惠	張敏璋	張豐緒家系	張豐緒家系	hasBrother
11076	11028	20282	20282	Undirected	張知惠	張敏竑	張豐緒家系	張豐緒家系	hasBrother
11083	11084	20255	20255	Undirected	張秀政	張秀青	張添根家族	張添根家族	hasBrother
11083	11130	20255	20255	Undirected	張秀政	張雨田	張添根家族	張添根家族	hasBrother
11084	11130	20255	20255	Undirected	張秀青	張雨田	張添根家族	張添根家族	hasBrother
11090	11114	20282	20282	Undirected	張緞	張豐彥	張豐緒家系	張豐緒家系	hasBrother
11090	11115	20282	20282	Undirected	張緞	張豐緒	張豐緒家系	張豐緒家系	hasBrother
11090	11116	20282	20282	Undirected	張緞	張豐胤	張豐緒家系	張豐緒家系	hasBrother
11091	11026	20282	20282	Undirected	張美惠	張敏洞	張豐緒家系	張豐緒家系	hasBrother
11091	11027	20282	20282	Undirected	張美惠	張敏璋	張豐緒家系	張豐緒家系	hasBrother
11091	11028	20282	20282	Undirected	張美惠	張敏竑	張豐緒家系	張豐緒家系	hasBrother
11093	10990	20300	20300	Undirected	張美絲	張定民	彰化銀行張伯欣家系	彰化銀行張伯欣家系	hasBrother
11093	10991	20300	20300	Undirected	張美絲	張定立	彰化銀行張伯欣家系	彰化銀行張伯欣家系	hasBrother
11095	10962	20228	20228	Undirected	張翠玉	張伯勳	張園家族	張園家族	hasBrother
11096	11097	20259	20259	Undirected	張耀京	張耀西	張煥珪家族	張煥珪家族	hasBrother
11096	11098	20259	20259	Undirected	張耀京	張耀鋒	張煥珪家族	張煥珪家族	hasBrother
11096	11099	20259	20259	Undirected	張耀京	張耀錡	張煥珪家族	張煥珪家族	hasBrother
11096	11100	20259	20259	Undirected	張耀京	張耀龍	張煥珪家族	張煥珪家族	hasBrother
11097	11098	20259	20259	Undirected	張耀西	張耀鋒	張煥珪家族	張煥珪家族	hasBrother
11097	11099	20259	20259	Undirected	張耀西	張耀錡	張煥珪家族	張煥珪家族	hasBrother
11097	11100	20259	20259	Undirected	張耀西	張耀龍	張煥珪家族	張煥珪家族	hasBrother
11098	11099	20259	20259	Undirected	張耀鋒	張耀錡	張煥珪家族	張煥珪家族	hasBrother
11098	11100	20259	20259	Undirected	張耀鋒	張耀龍	張煥珪家族	張煥珪家族	hasBrother
11099	11100	20259	20259	Undirected	張耀錡	張耀龍	張煥珪家族	張煥珪家族	hasBrother
11101	11119	20300	20300	Undirected	張聘三	張達三	彰化銀行張伯欣家系	彰化銀行張伯欣家系	hasBrother
11106	11114	20282	20282	Undirected	張若	張豐彥	張豐緒家系	張豐緒家系	hasBrother
11106	11115	20282	20282	Undirected	張若	張豐緒	張豐緒家系	張豐緒家系	hasBrother
11106	11116	20282	20282	Undirected	張若	張豐胤	張豐緒家系	張豐緒家系	hasBrother
11108	10957	20228	20228	Undirected	張莞卿	張世昌	張園家族	張園家族	hasBrother
11108	10958	20228	20228	Undirected	張莞卿	張世杰	張園家族	張園家族	hasBrother
11108	10959	20228	20228	Undirected	張莞卿	張丞模	張園家族	張園家族	hasBrother
11110	10987	20232	20232	Undirected	張蓓蒂	張孝威	張子武家族	張子武家族	hasBrother
11110	11023	20232	20232	Undirected	張蓓蒂	張愛倫	張子武家族	張子武家族	hasBrother
11113	10957	20228	20228	Undirected	張詢卿	張世昌	張園家族	張園家族	hasBrother
11113	10958	20228	20228	Undirected	張詢卿	張世杰	張園家族	張園家族	hasBrother
11113	10959	20228	20228	Undirected	張詢卿	張丞模	張園家族	張園家族	hasBrother
11114	11115	20282	20282	Undirected	張豐彥	張豐緒	張豐緒家系	張豐緒家系	hasBrother
11114	11116	20282	20282	Undirected	張豐彥	張豐胤	張豐緒家系	張豐緒家系	hasBrother
11115	11116	20282	20282	Undirected	張豐緒	張豐胤	張豐緒家系	張豐緒家系	hasBrother
11118	11117	20279	20279	Undirected	張超雄	張超英	張聰明家族	張聰明家族	hasBrother
11121	11122	20284	20284	Undirected	張邦珍	張邦翰	張邦翰家族	張邦翰家族	hasBrother
11125	11126	20285	20285	Undirected	張阿園_次男	張阿園_長男	張阿園家族	張阿園家族	hasBrother
11128	10975	20237	20237	Undirected	張雅琴	張哲碩	張建祥家族	張建祥家族	hasBrother
11129	10990	20300	20300	Undirected	張雅絲	張定民	彰化銀行張伯欣家系	彰化銀行張伯欣家系	hasBrother
11129	10991	20300	20300	Undirected	張雅絲	張定立	彰化銀行張伯欣家系	彰化銀行張伯欣家系	hasBrother
11132	11114	20282	20282	Undirected	張靜	張豐彥	張豐緒家系	張豐緒家系	hasBrother
11132	11115	20282	20282	Undirected	張靜	張豐緒	張豐緒家系	張豐緒家系	hasBrother
11132	11116	20282	20282	Undirected	張靜	張豐胤	張豐緒家系	張豐緒家系	hasBrother
11138	11139	20296	20296	Undirected	彭士佛	彭士偉	彭晟家族	彭晟家族	hasBrother
11142	11140	20296	20296	Undirected	彭士蘋	彭士孝	彭晟家族	彭晟家族	hasBrother
11143	11140	20296	20296	Undirected	彭士貞	彭士孝	彭晟家族	彭晟家族	hasBrother
11148	11149	20295	20295	Undirected	彭明哲	彭明敏	彭明敏家系	彭明敏家系	hasBrother
11148	11150	20295	20295	Undirected	彭明哲	彭明輝	彭明敏家系	彭明敏家系	hasBrother
11149	11150	20295	20295	Undirected	彭明敏	彭明輝	彭明敏家系	彭明敏家系	hasBrother
11153	11148	20295	20295	Undirected	彭淑媛	彭明哲	彭明敏家系	彭明敏家系	hasBrother
11153	11149	20295	20295	Undirected	彭淑媛	彭明敏	彭明敏家系	彭明敏家系	hasBrother
11153	11150	20295	20295	Undirected	彭淑媛	彭明輝	彭明敏家系	彭明敏家系	hasBrother
11156	11157	20292	20296	Undirected	彭蔭剛	彭蔭功	彭孟緝家族	彭晟家族	hasBrother
11156	11158	20292	20296	Undirected	彭蔭剛	彭蔭宣	彭孟緝家族	彭晟家族	hasBrother
11156	11159	20292	20296	Undirected	彭蔭剛	彭蔭川	彭孟緝家族	彭晟家族	hasBrother
11156	11160	20292	20296	Undirected	彭蔭剛	彭蔭時	彭孟緝家族	彭晟家族	hasBrother
11157	11158	20296	20296	Undirected	彭蔭功	彭蔭宣	彭晟家族	彭晟家族	hasBrother
11157	11159	20296	20296	Undirected	彭蔭功	彭蔭川	彭晟家族	彭晟家族	hasBrother
11157	11160	20296	20296	Undirected	彭蔭功	彭蔭時	彭晟家族	彭晟家族	hasBrother
11158	11159	20296	20296	Undirected	彭蔭宣	彭蔭川	彭晟家族	彭晟家族	hasBrother
11158	11160	20296	20296	Undirected	彭蔭宣	彭蔭時	彭晟家族	彭晟家族	hasBrother
11159	11160	20296	20296	Undirected	彭蔭川	彭蔭時	彭晟家族	彭晟家族	hasBrother
11169	11192	20304	20304	Undirected	徐干田	徐贏洲	徐清山家族	徐清山家族	hasBrother
11169	11193	20304	20304	Undirected	徐干田	徐辛盤	徐清山家族	徐清山家族	hasBrother
11171	11201	21068	20304	Undirected	徐懷達	徐龍雄	陳守山家系	徐清山家族	hasBrother
11172	11171	20304	21068	Undirected	徐明達	徐懷達	徐清山家族	陳守山家系	hasBrother
11172	11201	20304	20304	Undirected	徐明達	徐龍雄	徐清山家族	徐清山家族	hasBrother
11173	11174	20310	20310	Undirected	徐正位	徐正冠	徐鳳鳴家族	徐鳳鳴家族	hasBrother
11173	11175	20310	20310	Undirected	徐正位	徐正己	徐鳳鳴家族	徐鳳鳴家族	hasBrother
11173	11176	20310	20310	Undirected	徐正位	徐正新	徐鳳鳴家族	徐鳳鳴家族	hasBrother
11173	11177	20310	20310	Undirected	徐正位	徐正材	徐鳳鳴家族	徐鳳鳴家族	hasBrother
11173	11178	20310	20310	Undirected	徐正位	徐正泰	徐鳳鳴家族	徐鳳鳴家族	hasBrother
11173	11179	20310	20310	Undirected	徐正位	徐正群	徐鳳鳴家族	徐鳳鳴家族	hasBrother
11174	11175	20310	20310	Undirected	徐正冠	徐正己	徐鳳鳴家族	徐鳳鳴家族	hasBrother
11174	11176	20310	20310	Undirected	徐正冠	徐正新	徐鳳鳴家族	徐鳳鳴家族	hasBrother
11174	11177	20310	20310	Undirected	徐正冠	徐正材	徐鳳鳴家族	徐鳳鳴家族	hasBrother
11174	11178	20310	20310	Undirected	徐正冠	徐正泰	徐鳳鳴家族	徐鳳鳴家族	hasBrother
11174	11179	20310	20310	Undirected	徐正冠	徐正群	徐鳳鳴家族	徐鳳鳴家族	hasBrother
11175	11176	20310	20310	Undirected	徐正己	徐正新	徐鳳鳴家族	徐鳳鳴家族	hasBrother
11175	11177	20310	20310	Undirected	徐正己	徐正材	徐鳳鳴家族	徐鳳鳴家族	hasBrother
11175	11178	20310	20310	Undirected	徐正己	徐正泰	徐鳳鳴家族	徐鳳鳴家族	hasBrother
11175	11179	20310	20310	Undirected	徐正己	徐正群	徐鳳鳴家族	徐鳳鳴家族	hasBrother
11176	11177	20310	20310	Undirected	徐正新	徐正材	徐鳳鳴家族	徐鳳鳴家族	hasBrother
11176	11178	20310	20310	Undirected	徐正新	徐正泰	徐鳳鳴家族	徐鳳鳴家族	hasBrother
11176	11179	20310	20310	Undirected	徐正新	徐正群	徐鳳鳴家族	徐鳳鳴家族	hasBrother
11177	11178	20310	20310	Undirected	徐正材	徐正泰	徐鳳鳴家族	徐鳳鳴家族	hasBrother
11177	11179	20310	20310	Undirected	徐正材	徐正群	徐鳳鳴家族	徐鳳鳴家族	hasBrother
11178	11179	20310	20310	Undirected	徐正泰	徐正群	徐鳳鳴家族	徐鳳鳴家族	hasBrother
11182	11173	20310	20310	Undirected	徐美倫	徐正位	徐鳳鳴家族	徐鳳鳴家族	hasBrother
11182	11174	20310	20310	Undirected	徐美倫	徐正冠	徐鳳鳴家族	徐鳳鳴家族	hasBrother
11182	11175	20310	20310	Undirected	徐美倫	徐正己	徐鳳鳴家族	徐鳳鳴家族	hasBrother
11182	11176	20310	20310	Undirected	徐美倫	徐正新	徐鳳鳴家族	徐鳳鳴家族	hasBrother
11182	11177	20310	20310	Undirected	徐美倫	徐正材	徐鳳鳴家族	徐鳳鳴家族	hasBrother
11182	11178	20310	20310	Undirected	徐美倫	徐正泰	徐鳳鳴家族	徐鳳鳴家族	hasBrother
11182	11179	20310	20310	Undirected	徐美倫	徐正群	徐鳳鳴家族	徐鳳鳴家族	hasBrother
11183	11173	20310	20310	Undirected	徐美媛	徐正位	徐鳳鳴家族	徐鳳鳴家族	hasBrother
11183	11174	20310	20310	Undirected	徐美媛	徐正冠	徐鳳鳴家族	徐鳳鳴家族	hasBrother
11183	11175	20310	20310	Undirected	徐美媛	徐正己	徐鳳鳴家族	徐鳳鳴家族	hasBrother
11183	11176	20310	20310	Undirected	徐美媛	徐正新	徐鳳鳴家族	徐鳳鳴家族	hasBrother
11183	11177	20310	20310	Undirected	徐美媛	徐正材	徐鳳鳴家族	徐鳳鳴家族	hasBrother
11183	11178	20310	20310	Undirected	徐美媛	徐正泰	徐鳳鳴家族	徐鳳鳴家族	hasBrother
11183	11179	20310	20310	Undirected	徐美媛	徐正群	徐鳳鳴家族	徐鳳鳴家族	hasBrother
11184	11173	20310	20310	Undirected	徐美智	徐正位	徐鳳鳴家族	徐鳳鳴家族	hasBrother
11184	11174	20310	20310	Undirected	徐美智	徐正冠	徐鳳鳴家族	徐鳳鳴家族	hasBrother
11184	11175	20310	20310	Undirected	徐美智	徐正己	徐鳳鳴家族	徐鳳鳴家族	hasBrother
11184	11176	20310	20310	Undirected	徐美智	徐正新	徐鳳鳴家族	徐鳳鳴家族	hasBrother
11184	11177	20310	20310	Undirected	徐美智	徐正材	徐鳳鳴家族	徐鳳鳴家族	hasBrother
11184	11178	20310	20310	Undirected	徐美智	徐正泰	徐鳳鳴家族	徐鳳鳴家族	hasBrother
11184	11179	20310	20310	Undirected	徐美智	徐正群	徐鳳鳴家族	徐鳳鳴家族	hasBrother
11185	11171	20304	21068	Undirected	徐美玟	徐懷達	徐清山家族	陳守山家系	hasBrother
11185	11201	20304	20304	Undirected	徐美玟	徐龍雄	徐清山家族	徐清山家族	hasBrother
11186	11173	20310	20310	Undirected	徐美玲	徐正位	徐鳳鳴家族	徐鳳鳴家族	hasBrother
11186	11174	20310	20310	Undirected	徐美玲	徐正冠	徐鳳鳴家族	徐鳳鳴家族	hasBrother
11186	11175	20310	20310	Undirected	徐美玲	徐正己	徐鳳鳴家族	徐鳳鳴家族	hasBrother
11186	11176	20310	20310	Undirected	徐美玲	徐正新	徐鳳鳴家族	徐鳳鳴家族	hasBrother
11186	11177	20310	20310	Undirected	徐美玲	徐正材	徐鳳鳴家族	徐鳳鳴家族	hasBrother
11186	11178	20310	20310	Undirected	徐美玲	徐正泰	徐鳳鳴家族	徐鳳鳴家族	hasBrother
11186	11179	20310	20310	Undirected	徐美玲	徐正群	徐鳳鳴家族	徐鳳鳴家族	hasBrother
11187	11171	20304	21068	Undirected	徐美玲1	徐懷達	徐清山家族	陳守山家系	hasBrother
11187	11201	20304	20304	Undirected	徐美玲1	徐龍雄	徐清山家族	徐清山家族	hasBrother
11192	11193	20304	20304	Undirected	徐贏洲	徐辛盤	徐清山家族	徐清山家族	hasBrother
11195	11196	20310	20310	Undirected	徐風和	徐風惠	徐鳳鳴家族	徐鳳鳴家族	hasBrother
11195	11197	20310	20310	Undirected	徐風和	徐風楷	徐鳳鳴家族	徐鳳鳴家族	hasBrother
11195	11198	20310	20310	Undirected	徐風和	徐風澤	徐鳳鳴家族	徐鳳鳴家族	hasBrother
11195	11199	20310	20310	Undirected	徐風和	徐風謨	徐鳳鳴家族	徐鳳鳴家族	hasBrother
11196	11197	20310	20310	Undirected	徐風惠	徐風楷	徐鳳鳴家族	徐鳳鳴家族	hasBrother
11196	11198	20310	20310	Undirected	徐風惠	徐風澤	徐鳳鳴家族	徐鳳鳴家族	hasBrother
11196	11199	20310	20310	Undirected	徐風惠	徐風謨	徐鳳鳴家族	徐鳳鳴家族	hasBrother
11197	11198	20310	20310	Undirected	徐風楷	徐風澤	徐鳳鳴家族	徐鳳鳴家族	hasBrother
11197	11199	20310	20310	Undirected	徐風楷	徐風謨	徐鳳鳴家族	徐鳳鳴家族	hasBrother
11198	11199	20310	20310	Undirected	徐風澤	徐風謨	徐鳳鳴家族	徐鳳鳴家族	hasBrother
11203	11205	20315	20315	Undirected	戴喜美	戴怡安	戴鳳倚家族	戴鳳倚家族	hasBrother
11203	11206	20315	20315	Undirected	戴喜美	戴怡德	戴鳳倚家族	戴鳳倚家族	hasBrother
11203	11208	20315	20315	Undirected	戴喜美	戴東原	戴鳳倚家族	戴鳳倚家族	hasBrother
11203	11209	20315	20315	Undirected	戴喜美	戴東生	戴鳳倚家族	戴鳳倚家族	hasBrother
11203	11210	20315	20315	Undirected	戴喜美	戴東雄	戴鳳倚家族	戴鳳倚家族	hasBrother
11204	11205	20315	20315	Undirected	戴壽美	戴怡安	戴鳳倚家族	戴鳳倚家族	hasBrother
11204	11206	20315	20315	Undirected	戴壽美	戴怡德	戴鳳倚家族	戴鳳倚家族	hasBrother
11204	11208	20315	20315	Undirected	戴壽美	戴東原	戴鳳倚家族	戴鳳倚家族	hasBrother
11204	11209	20315	20315	Undirected	戴壽美	戴東生	戴鳳倚家族	戴鳳倚家族	hasBrother
11204	11210	20315	20315	Undirected	戴壽美	戴東雄	戴鳳倚家族	戴鳳倚家族	hasBrother
11205	11206	20315	20315	Undirected	戴怡安	戴怡德	戴鳳倚家族	戴鳳倚家族	hasBrother
11205	11208	20315	20315	Undirected	戴怡安	戴東原	戴鳳倚家族	戴鳳倚家族	hasBrother
11205	11209	20315	20315	Undirected	戴怡安	戴東生	戴鳳倚家族	戴鳳倚家族	hasBrother
11205	11210	20315	20315	Undirected	戴怡安	戴東雄	戴鳳倚家族	戴鳳倚家族	hasBrother
11206	11208	20315	20315	Undirected	戴怡德	戴東原	戴鳳倚家族	戴鳳倚家族	hasBrother
11206	11209	20315	20315	Undirected	戴怡德	戴東生	戴鳳倚家族	戴鳳倚家族	hasBrother
11206	11210	20315	20315	Undirected	戴怡德	戴東雄	戴鳳倚家族	戴鳳倚家族	hasBrother
11208	11209	20315	20315	Undirected	戴東原	戴東生	戴鳳倚家族	戴鳳倚家族	hasBrother
11208	11210	20315	20315	Undirected	戴東原	戴東雄	戴鳳倚家族	戴鳳倚家族	hasBrother
11209	11210	20315	20315	Undirected	戴東生	戴東雄	戴鳳倚家族	戴鳳倚家族	hasBrother
11215	11216	20316	20316	Undirected	文心怡	文衍正	文錫圭家族	文錫圭家族	hasBrother
11215	11217	20316	20316	Undirected	文心怡	文衍誠	文錫圭家族	文錫圭家族	hasBrother
11216	11217	20316	20316	Undirected	文衍正	文衍誠	文錫圭家族	文錫圭家族	hasBrother
11225	11226	20322	20322	Undirected	方瑀	方瑋	方聲恆家族	方聲恆家族	hasBrother
11227	11226	20322	20322	Undirected	方環	方瑋	方聲恆家族	方聲恆家族	hasBrother
11234	11235	20327	20327	Undirected	施江北	施江南	施瑞呈家族	施瑞呈家族	hasBrother
11234	11236	20327	20327	Undirected	施江北	施江東	施瑞呈家族	施瑞呈家族	hasBrother
11234	11237	20327	20327	Undirected	施江北	施江西	施瑞呈家族	施瑞呈家族	hasBrother
11235	11236	20327	20327	Undirected	施江南	施江東	施瑞呈家族	施瑞呈家族	hasBrother
11235	11237	20327	20327	Undirected	施江南	施江西	施瑞呈家族	施瑞呈家族	hasBrother
11236	11237	20327	20327	Undirected	施江東	施江西	施瑞呈家族	施瑞呈家族	hasBrother
11248	11251	20332	20332	Undirected	曹亮吉	曹恆平	曹丁波家族	曹丁波家族	hasBrother
11248	11264	20332	20332	Undirected	曹亮吉	曹永祥	曹丁波家族	曹丁波家族	hasBrother
11250	11260	20334	20334	Undirected	曹妍	曹永和	曹永和家系	曹永和家系	hasBrother
11250	11261	20334	20334	Undirected	曹妍	曹永坤	曹永和家系	曹永和家系	hasBrother
11250	11262	20334	20334	Undirected	曹妍	曹永年	曹永和家系	曹永和家系	hasBrother
11250	11263	20334	20334	Undirected	曹妍	曹永彥	曹永和家系	曹永和家系	hasBrother
11250	11265	20334	20334	Undirected	曹妍	曹永裕	曹永和家系	曹永和家系	hasBrother
11250	11266	20334	20334	Undirected	曹妍	曹永達	曹永和家系	曹永和家系	hasBrother
11251	11264	20332	20332	Undirected	曹恆平	曹永祥	曹丁波家族	曹丁波家族	hasBrother
11252	11257	20334	20334	Undirected	曹慧玲	曹昌秀	曹永和家系	曹永和家系	hasBrother
11252	11258	20334	20334	Undirected	曹慧玲	曹昌言	曹永和家系	曹永和家系	hasBrother
11253	11248	20332	20332	Undirected	曹慧玲-1	曹亮吉	曹丁波家族	曹丁波家族	hasBrother
11253	11251	20332	20332	Undirected	曹慧玲-1	曹恆平	曹丁波家族	曹丁波家族	hasBrother
11253	11264	20332	20332	Undirected	曹慧玲-1	曹永祥	曹丁波家族	曹丁波家族	hasBrother
11254	11257	20334	20334	Undirected	曹慧生	曹昌秀	曹永和家系	曹永和家系	hasBrother
11254	11258	20334	20334	Undirected	曹慧生	曹昌言	曹永和家系	曹永和家系	hasBrother
11257	11258	20334	20334	Undirected	曹昌秀	曹昌言	曹永和家系	曹永和家系	hasBrother
11260	11261	20334	20334	Undirected	曹永和	曹永坤	曹永和家系	曹永和家系	hasBrother
11260	11262	20334	20334	Undirected	曹永和	曹永年	曹永和家系	曹永和家系	hasBrother
11260	11263	20334	20334	Undirected	曹永和	曹永彥	曹永和家系	曹永和家系	hasBrother
11260	11265	20334	20334	Undirected	曹永和	曹永裕	曹永和家系	曹永和家系	hasBrother
11260	11266	20334	20334	Undirected	曹永和	曹永達	曹永和家系	曹永和家系	hasBrother
11261	11262	20334	20334	Undirected	曹永坤	曹永年	曹永和家系	曹永和家系	hasBrother
11261	11263	20334	20334	Undirected	曹永坤	曹永彥	曹永和家系	曹永和家系	hasBrother
11261	11265	20334	20334	Undirected	曹永坤	曹永裕	曹永和家系	曹永和家系	hasBrother
11261	11266	20334	20334	Undirected	曹永坤	曹永達	曹永和家系	曹永和家系	hasBrother
11262	11263	20334	20334	Undirected	曹永年	曹永彥	曹永和家系	曹永和家系	hasBrother
11262	11265	20334	20334	Undirected	曹永年	曹永裕	曹永和家系	曹永和家系	hasBrother
11262	11266	20334	20334	Undirected	曹永年	曹永達	曹永和家系	曹永和家系	hasBrother
11263	11265	20334	20334	Undirected	曹永彥	曹永裕	曹永和家系	曹永和家系	hasBrother
11263	11266	20334	20334	Undirected	曹永彥	曹永達	曹永和家系	曹永和家系	hasBrother
11265	11266	20334	20334	Undirected	曹永裕	曹永達	曹永和家系	曹永和家系	hasBrother
11267	11260	20334	20334	Undirected	曹淑清	曹永和	曹永和家系	曹永和家系	hasBrother
11267	11261	20334	20334	Undirected	曹淑清	曹永坤	曹永和家系	曹永和家系	hasBrother
11267	11262	20334	20334	Undirected	曹淑清	曹永年	曹永和家系	曹永和家系	hasBrother
11267	11263	20334	20334	Undirected	曹淑清	曹永彥	曹永和家系	曹永和家系	hasBrother
11267	11265	20334	20334	Undirected	曹淑清	曹永裕	曹永和家系	曹永和家系	hasBrother
11267	11266	20334	20334	Undirected	曹淑清	曹永達	曹永和家系	曹永和家系	hasBrother
11268	11260	20334	20334	Undirected	曹玉梅	曹永和	曹永和家系	曹永和家系	hasBrother
11268	11261	20334	20334	Undirected	曹玉梅	曹永坤	曹永和家系	曹永和家系	hasBrother
11268	11262	20334	20334	Undirected	曹玉梅	曹永年	曹永和家系	曹永和家系	hasBrother
11268	11263	20334	20334	Undirected	曹玉梅	曹永彥	曹永和家系	曹永和家系	hasBrother
11268	11265	20334	20334	Undirected	曹玉梅	曹永裕	曹永和家系	曹永和家系	hasBrother
11268	11266	20334	20334	Undirected	曹玉梅	曹永達	曹永和家系	曹永和家系	hasBrother
11269	11248	20332	20332	Undirected	曹理英	曹亮吉	曹丁波家族	曹丁波家族	hasBrother
11269	11251	20332	20332	Undirected	曹理英	曹恆平	曹丁波家族	曹丁波家族	hasBrother
11269	11264	20332	20332	Undirected	曹理英	曹永祥	曹丁波家族	曹丁波家族	hasBrother
11270	11260	20334	20334	Undirected	曹美玉	曹永和	曹永和家系	曹永和家系	hasBrother
11270	11261	20334	20334	Undirected	曹美玉	曹永坤	曹永和家系	曹永和家系	hasBrother
11270	11262	20334	20334	Undirected	曹美玉	曹永年	曹永和家系	曹永和家系	hasBrother
11270	11263	20334	20334	Undirected	曹美玉	曹永彥	曹永和家系	曹永和家系	hasBrother
11270	11265	20334	20334	Undirected	曹美玉	曹永裕	曹永和家系	曹永和家系	hasBrother
11270	11266	20334	20334	Undirected	曹美玉	曹永達	曹永和家系	曹永和家系	hasBrother
11272	11260	20334	20334	Undirected	曹菊芬	曹永和	曹永和家系	曹永和家系	hasBrother
11272	11261	20334	20334	Undirected	曹菊芬	曹永坤	曹永和家系	曹永和家系	hasBrother
11272	11262	20334	20334	Undirected	曹菊芬	曹永年	曹永和家系	曹永和家系	hasBrother
11272	11263	20334	20334	Undirected	曹菊芬	曹永彥	曹永和家系	曹永和家系	hasBrother
11272	11265	20334	20334	Undirected	曹菊芬	曹永裕	曹永和家系	曹永和家系	hasBrother
11272	11266	20334	20334	Undirected	曹菊芬	曹永達	曹永和家系	曹永和家系	hasBrother
11273	11274	20334	20334	Undirected	曹賜瑩	曹賜璧	曹永和家系	曹永和家系	hasBrother
11275	11248	20332	20332	Undirected	曹郁芬	曹亮吉	曹丁波家族	曹丁波家族	hasBrother
11275	11251	20332	20332	Undirected	曹郁芬	曹恆平	曹丁波家族	曹丁波家族	hasBrother
11275	11264	20332	20332	Undirected	曹郁芬	曹永祥	曹丁波家族	曹丁波家族	hasBrother
11277	11302	20336	20336	Undirected	曾依仁	曾浴沂	曾依仁家族	曾依仁家族	hasBrother
11277	11305	20336	20336	Undirected	曾依仁	曾炳奎	曾依仁家族	曾依仁家族	hasBrother
11277	11306	20336	20336	Undirected	曾依仁	曾炳輝	曾依仁家族	曾依仁家族	hasBrother
11277	11321	20336	20336	Undirected	曾依仁	曾金澤	曾依仁家族	曾依仁家族	hasBrother
11278	11280	20337	20337	Undirected	曾國漢	曾國藩	曾國藩家族	曾國藩家族	hasBrother
11279	11280	20337	20337	Undirected	曾國潢	曾國藩	曾國藩家族	曾國藩家族	hasBrother
11281	11291	20345	20404	Undirected	曾娟	曾文勳	曾石岳家族	李登輝家系	hasBrother
11281	11294	20345	20345	Undirected	曾娟	曾文炳	曾石岳家族	曾石岳家族	hasBrother
11281	11295	20345	20345	Undirected	曾娟	曾文耀	曾石岳家族	曾石岳家族	hasBrother
11281	11296	20345	20345	Undirected	曾娟	曾文輝	曾石岳家族	曾石岳家族	hasBrother
11281	11297	20345	20345	Undirected	曾娟	曾文雄	曾石岳家族	曾石岳家族	hasBrother
11282	11299	20337	20337	Undirected	曾寶蓀	曾昭柯	曾國藩家族	曾國藩家族	hasBrother
11283	11286	20337	20337	Undirected	曾廣珊	曾廣鈞	曾國藩家族	曾國藩家族	hasBrother
11283	11287	20337	20337	Undirected	曾廣珊	曾廣銓	曾國藩家族	曾國藩家族	hasBrother
11286	11287	20337	20337	Undirected	曾廣鈞	曾廣銓	曾國藩家族	曾國藩家族	hasBrother
11290	11291	20345	20404	Undirected	曾敏	曾文勳	曾石岳家族	李登輝家系	hasBrother
11290	11294	20345	20345	Undirected	曾敏	曾文炳	曾石岳家族	曾石岳家族	hasBrother
11290	11295	20345	20345	Undirected	曾敏	曾文耀	曾石岳家族	曾石岳家族	hasBrother
11290	11296	20345	20345	Undirected	曾敏	曾文輝	曾石岳家族	曾石岳家族	hasBrother
11290	11297	20345	20345	Undirected	曾敏	曾文雄	曾石岳家族	曾石岳家族	hasBrother
11291	11294	20404	20345	Undirected	曾文勳	曾文炳	李登輝家系	曾石岳家族	hasBrother
11291	11295	20404	20345	Undirected	曾文勳	曾文耀	李登輝家系	曾石岳家族	hasBrother
11291	11296	20404	20345	Undirected	曾文勳	曾文輝	李登輝家系	曾石岳家族	hasBrother
11291	11297	20404	20345	Undirected	曾文勳	曾文雄	李登輝家系	曾石岳家族	hasBrother
11293	11291	20345	20404	Undirected	曾文惠	曾文勳	曾石岳家族	李登輝家系	hasBrother
11293	11294	20345	20345	Undirected	曾文惠	曾文炳	曾石岳家族	曾石岳家族	hasBrother
11293	11295	20345	20345	Undirected	曾文惠	曾文耀	曾石岳家族	曾石岳家族	hasBrother
11293	11296	20345	20345	Undirected	曾文惠	曾文輝	曾石岳家族	曾石岳家族	hasBrother
11293	11297	20345	20345	Undirected	曾文惠	曾文雄	曾石岳家族	曾石岳家族	hasBrother
11294	11295	20345	20345	Undirected	曾文炳	曾文耀	曾石岳家族	曾石岳家族	hasBrother
11294	11296	20345	20345	Undirected	曾文炳	曾文輝	曾石岳家族	曾石岳家族	hasBrother
11294	11297	20345	20345	Undirected	曾文炳	曾文雄	曾石岳家族	曾石岳家族	hasBrother
11295	11296	20345	20345	Undirected	曾文耀	曾文輝	曾石岳家族	曾石岳家族	hasBrother
11295	11297	20345	20345	Undirected	曾文耀	曾文雄	曾石岳家族	曾石岳家族	hasBrother
11296	11297	20345	20345	Undirected	曾文輝	曾文雄	曾石岳家族	曾石岳家族	hasBrother
11300	11298	20337	20337	Undirected	曾昭楣	曾昭掄	曾國藩家族	曾國藩家族	hasBrother
11302	11305	20336	20336	Undirected	曾浴沂	曾炳奎	曾依仁家族	曾依仁家族	hasBrother
11302	11306	20336	20336	Undirected	曾浴沂	曾炳輝	曾依仁家族	曾依仁家族	hasBrother
11302	11321	20336	20336	Undirected	曾浴沂	曾金澤	曾依仁家族	曾依仁家族	hasBrother
11303	11288	20345	20345	Undirected	曾淑人	曾慶餘	曾石岳家族	曾石岳家族	hasBrother
11305	11306	20336	20336	Undirected	曾炳奎	曾炳輝	曾依仁家族	曾依仁家族	hasBrother
11305	11321	20336	20336	Undirected	曾炳奎	曾金澤	曾依仁家族	曾依仁家族	hasBrother
11306	11321	20336	20336	Undirected	曾炳輝	曾金澤	曾依仁家族	曾依仁家族	hasBrother
11307	11277	20342	20336	Undirected	曾玉枕	曾依仁	曾玉枕家族	曾依仁家族	hasBrother
11307	11302	20342	20336	Undirected	曾玉枕	曾浴沂	曾玉枕家族	曾依仁家族	hasBrother
11307	11305	20342	20336	Undirected	曾玉枕	曾炳奎	曾玉枕家族	曾依仁家族	hasBrother
11307	11306	20342	20336	Undirected	曾玉枕	曾炳輝	曾玉枕家族	曾依仁家族	hasBrother
11307	11321	20342	20336	Undirected	曾玉枕	曾金澤	曾玉枕家族	曾依仁家族	hasBrother
11308	11277	20342	20336	Undirected	曾玉璣	曾依仁	曾玉枕家族	曾依仁家族	hasBrother
11308	11302	20342	20336	Undirected	曾玉璣	曾浴沂	曾玉枕家族	曾依仁家族	hasBrother
11308	11305	20342	20336	Undirected	曾玉璣	曾炳奎	曾玉枕家族	曾依仁家族	hasBrother
11308	11306	20342	20336	Undirected	曾玉璣	曾炳輝	曾玉枕家族	曾依仁家族	hasBrother
11308	11321	20342	20336	Undirected	曾玉璣	曾金澤	曾玉枕家族	曾依仁家族	hasBrother
11309	11277	20336	20336	Undirected	曾玉霞	曾依仁	曾依仁家族	曾依仁家族	hasBrother
11309	11302	20336	20336	Undirected	曾玉霞	曾浴沂	曾依仁家族	曾依仁家族	hasBrother
11309	11305	20336	20336	Undirected	曾玉霞	曾炳奎	曾依仁家族	曾依仁家族	hasBrother
11309	11306	20336	20336	Undirected	曾玉霞	曾炳輝	曾依仁家族	曾依仁家族	hasBrother
11309	11321	20336	20336	Undirected	曾玉霞	曾金澤	曾依仁家族	曾依仁家族	hasBrother
11310	11277	20342	20336	Undirected	曾玉鶯	曾依仁	曾玉枕家族	曾依仁家族	hasBrother
11310	11302	20342	20336	Undirected	曾玉鶯	曾浴沂	曾玉枕家族	曾依仁家族	hasBrother
11310	11305	20342	20336	Undirected	曾玉鶯	曾炳奎	曾玉枕家族	曾依仁家族	hasBrother
11310	11306	20342	20336	Undirected	曾玉鶯	曾炳輝	曾玉枕家族	曾依仁家族	hasBrother
11310	11321	20342	20336	Undirected	曾玉鶯	曾金澤	曾玉枕家族	曾依仁家族	hasBrother
11315	11318	20337	20337	Undirected	曾紀澤	曾紀鴻	曾國藩家族	曾國藩家族	hasBrother
11316	11315	20337	20337	Undirected	曾紀純	曾紀澤	曾國藩家族	曾國藩家族	hasBrother
11316	11318	20337	20337	Undirected	曾紀純	曾紀鴻	曾國藩家族	曾國藩家族	hasBrother
11317	11315	20337	20337	Undirected	曾紀芬	曾紀澤	曾國藩家族	曾國藩家族	hasBrother
11317	11318	20337	20337	Undirected	曾紀芬	曾紀鴻	曾國藩家族	曾國藩家族	hasBrother
11323	11324	20336	20336	Undirected	曾鴻基	曾鴻文	曾依仁家族	曾依仁家族	hasBrother
11325	11323	20336	20336	Undirected	曾麗朱	曾鴻基	曾依仁家族	曾依仁家族	hasBrother
11325	11324	20336	20336	Undirected	曾麗朱	曾鴻文	曾依仁家族	曾依仁家族	hasBrother
11328	11338	20349	20349	Undirected	朱佩卿	朱建堯	朱世慶家族	朱世慶家族	hasBrother
11328	11339	20349	20349	Undirected	朱佩卿	朱建舜	朱世慶家族	朱世慶家族	hasBrother
11329	11338	20349	20349	Undirected	朱佩芳	朱建堯	朱世慶家族	朱世慶家族	hasBrother
11329	11339	20349	20349	Undirected	朱佩芳	朱建舜	朱世慶家族	朱世慶家族	hasBrother
11330	11338	20349	20349	Undirected	朱佩麗	朱建堯	朱世慶家族	朱世慶家族	hasBrother
11330	11339	20349	20349	Undirected	朱佩麗	朱建舜	朱世慶家族	朱世慶家族	hasBrother
11332	11343	20349	20349	Undirected	朱吟	朱文俊	朱世慶家族	朱世慶家族	hasBrother
11332	11344	20349	20349	Undirected	朱吟	朱文傑	朱世慶家族	朱世慶家族	hasBrother
11332	11345	20349	20349	Undirected	朱吟	朱文儀	朱世慶家族	朱世慶家族	hasBrother
11332	11346	20349	20349	Undirected	朱吟	朱文豪	朱世慶家族	朱世慶家族	hasBrother
11335	11354	20352	20352	Undirected	朱孟俐	朱瑞墉	朱應三家族	朱應三家族	hasBrother
11337	11340	20354	20354	Undirected	朱崑陽	朱彩陽	朱昭陽家系	朱昭陽家系	hasBrother
11337	11347	20354	20354	Undirected	朱崑陽	朱明陽	朱昭陽家系	朱昭陽家系	hasBrother
11337	11348	20354	20354	Undirected	朱崑陽	朱昭陽	朱昭陽家系	朱昭陽家系	hasBrother
11337	11359	20354	20354	Undirected	朱崑陽	朱華陽	朱昭陽家系	朱昭陽家系	hasBrother
11337	11360	20354	20354	Undirected	朱崑陽	朱驕陽	朱昭陽家系	朱昭陽家系	hasBrother
11338	11339	20349	20349	Undirected	朱建堯	朱建舜	朱世慶家族	朱世慶家族	hasBrother
11340	11347	20354	20354	Undirected	朱彩陽	朱明陽	朱昭陽家系	朱昭陽家系	hasBrother
11340	11348	20354	20354	Undirected	朱彩陽	朱昭陽	朱昭陽家系	朱昭陽家系	hasBrother
11340	11359	20354	20354	Undirected	朱彩陽	朱華陽	朱昭陽家系	朱昭陽家系	hasBrother
11340	11360	20354	20354	Undirected	朱彩陽	朱驕陽	朱昭陽家系	朱昭陽家系	hasBrother
11343	11344	20349	20349	Undirected	朱文俊	朱文傑	朱世慶家族	朱世慶家族	hasBrother
11343	11345	20349	20349	Undirected	朱文俊	朱文儀	朱世慶家族	朱世慶家族	hasBrother
11343	11346	20349	20349	Undirected	朱文俊	朱文豪	朱世慶家族	朱世慶家族	hasBrother
11344	11345	20349	20349	Undirected	朱文傑	朱文儀	朱世慶家族	朱世慶家族	hasBrother
11344	11346	20349	20349	Undirected	朱文傑	朱文豪	朱世慶家族	朱世慶家族	hasBrother
11345	11346	20349	20349	Undirected	朱文儀	朱文豪	朱世慶家族	朱世慶家族	hasBrother
11347	11348	20354	20354	Undirected	朱明陽	朱昭陽	朱昭陽家系	朱昭陽家系	hasBrother
11347	11359	20354	20354	Undirected	朱明陽	朱華陽	朱昭陽家系	朱昭陽家系	hasBrother
11347	11360	20354	20354	Undirected	朱明陽	朱驕陽	朱昭陽家系	朱昭陽家系	hasBrother
11348	11359	20354	20354	Undirected	朱昭陽	朱華陽	朱昭陽家系	朱昭陽家系	hasBrother
11348	11360	20354	20354	Undirected	朱昭陽	朱驕陽	朱昭陽家系	朱昭陽家系	hasBrother
11351	11355	20352	20352	Undirected	朱江淮	朱瑞庚	朱應三家族	朱應三家族	hasBrother
11356	11357	20354	20354	Undirected	朱秋月	朱耀沂	朱昭陽家系	朱昭陽家系	hasBrother
11356	11358	20354	20354	Undirected	朱秋月	朱耀源	朱昭陽家系	朱昭陽家系	hasBrother
11357	11358	20354	20354	Undirected	朱耀沂	朱耀源	朱昭陽家系	朱昭陽家系	hasBrother
11359	11360	20354	20354	Undirected	朱華陽	朱驕陽	朱昭陽家系	朱昭陽家系	hasBrother
11374	11375	20373	20373	Undirected	李君晰	李君曜	李崇禮家族	李崇禮家族	hasBrother
11377	11416	20362	20362	Undirected	李增義	李曾禮	李兆偉家族	李兆偉家族	hasBrother
11379	11453	20381	20381	Undirected	李婉然	李維禎	李春生家族	李春生家族	hasBrother
11380	11453	20381	20381	Undirected	李嬌姿	李維禎	李春生家族	李春生家族	hasBrother
11380	11454	20381	20381	Undirected	李嬌姿	李維興	李春生家族	李春生家族	hasBrother
11381	11453	20381	20381	Undirected	李嬌容	李維禎	李春生家族	李春生家族	hasBrother
11381	11454	20381	20381	Undirected	李嬌容	李維興	李春生家族	李春生家族	hasBrother
11382	11453	20381	20381	Undirected	李嬌麗	李維禎	李春生家族	李春生家族	hasBrother
11382	11454	20381	20381	Undirected	李嬌麗	李維興	李春生家族	李春生家族	hasBrother
11385	11402	20404	20404	Undirected	李安妮	李憲文	李登輝家系	李登輝家系	hasBrother
11386	11402	20404	20404	Undirected	李安娜	李憲文	李登輝家系	李登輝家系	hasBrother
11388	11372	20392	20367	Undirected	李宜靜	李原宏	李正明家族	李原宏家族	hasBrother
11392	11393	20381	20381	Undirected	李延禧	李延齡	李春生家族	李春生家族	hasBrother
11395	11394	20390	20390	Undirected	李彥頤	李彥樞	李榮龍家族	李榮龍家族	hasBrother
11403	11404	20404	20404	Undirected	李憲昌	李憲明	李登輝家系	李登輝家系	hasBrother
11410	11411	20359	20359	Undirected	李昆玉	李昆耀	李仲義家族	李仲義家族	hasBrother
11410	11439	20359	20359	Undirected	李昆玉	李瑞雲	李仲義家族	李仲義家族	hasBrother
11429	11414	20381	20381	Undirected	李添盛	李景盛	李春生家族	李春生家族	hasBrother
11429	11489	20381	20381	Undirected	李添盛	李高盛	李春生家族	李春生家族	hasBrother
11434	11442	20404	20404	Undirected	李炳楠	李登欽	李登輝家系	李登輝家系	hasBrother
11434	11443	20404	20404	Undirected	李炳楠	李登輝	李登輝家系	李登輝家系	hasBrother
11436	11372	20392	20367	Undirected	李玟靜	李原宏	李正明家族	李原宏家族	hasBrother
11439	11411	20359	20359	Undirected	李瑞雲	李昆耀	李仲義家族	李仲義家族	hasBrother
11442	11443	20404	20404	Undirected	李登欽	李登輝	李登輝家系	李登輝家系	hasBrother
11453	11454	20381	20381	Undirected	李維禎	李維興	李春生家族	李春生家族	hasBrother
11463	11377	20362	20362	Undirected	李荷	李增義	李兆偉家族	李兆偉家族	hasBrother
11463	11416	20362	20362	Undirected	李荷	李曾禮	李兆偉家族	李兆偉家族	hasBrother
11464	11377	20362	20362	Undirected	李菱	李增義	李兆偉家族	李兆偉家族	hasBrother
11464	11416	20362	20362	Undirected	李菱	李曾禮	李兆偉家族	李兆偉家族	hasBrother
11477	11478	20366	20366	Undirected	李開娥	李開山	李南家族	李南家族	hasBrother
11477	11480	20366	20366	Undirected	李開娥	李開胡	李南家族	李南家族	hasBrother
11478	11479	20366	20366	Undirected	李開山	李開榮	李南家族	李南家族	hasBrother
11478	11480	20366	20366	Undirected	李開山	李開胡	李南家族	李南家族	hasBrother
11479	11480	20366	20366	Undirected	李開榮	李開胡	李南家族	李南家族	hasBrother
11486	11453	20381	20381	Undirected	李順子	李維禎	李春生家族	李春生家族	hasBrother
11486	11454	20381	20381	Undirected	李順子	李維興	李春生家族	李春生家族	hasBrother
11487	11453	20381	20381	Undirected	李順美	李維禎	李春生家族	李春生家族	hasBrother
11487	11454	20381	20381	Undirected	李順美	李維興	李春生家族	李春生家族	hasBrother
11489	11414	20381	20381	Undirected	李高盛	李景盛	李春生家族	李春生家族	hasBrother
11490	11492	20366	20366	Undirected	李鳳儀	李鳳盛	李南家族	李南家族	hasBrother
11490	11495	20366	20366	Undirected	李鳳儀	李鳳鳴	李南家族	李南家族	hasBrother
11491	11490	20366	20366	Undirected	李鳳彩	李鳳儀	李南家族	李南家族	hasBrother
11491	11492	20366	20366	Undirected	李鳳彩	李鳳盛	李南家族	李南家族	hasBrother
11491	11495	20366	20366	Undirected	李鳳彩	李鳳鳴	李南家族	李南家族	hasBrother
11493	11490	20366	20366	Undirected	李鳳美	李鳳儀	李南家族	李南家族	hasBrother
11493	11492	20366	20366	Undirected	李鳳美	李鳳盛	李南家族	李南家族	hasBrother
11493	11495	20366	20366	Undirected	李鳳美	李鳳鳴	李南家族	李南家族	hasBrother
11494	11490	20366	20366	Undirected	李鳳雀	李鳳儀	李南家族	李南家族	hasBrother
11494	11492	20366	20366	Undirected	李鳳雀	李鳳盛	李南家族	李南家族	hasBrother
11494	11495	20366	20366	Undirected	李鳳雀	李鳳鳴	李南家族	李南家族	hasBrother
11495	11492	20366	20366	Undirected	李鳳鳴	李鳳盛	李南家族	李南家族	hasBrother
11496	11490	20366	20366	Undirected	李鳳鸞	李鳳儀	李南家族	李南家族	hasBrother
11496	11492	20366	20366	Undirected	李鳳鸞	李鳳盛	李南家族	李南家族	hasBrother
11496	11495	20366	20366	Undirected	李鳳鸞	李鳳鳴	李南家族	李南家族	hasBrother
11497	11498	20406	20406	Undirected	李鴻章	李鶴章	李立安家族	李立安家族	hasBrother
11501	11504	20427	20427	Undirected	杜家齊	杜生財	杜聰明家族	杜聰明家族	hasBrother
11501	11509	20427	20427	Undirected	杜家齊	杜聰明	杜聰明家族	杜聰明家族	hasBrother
11503	11505	20427	20427	Undirected	杜淑純	杜祖信	杜聰明家族	杜聰明家族	hasBrother
11503	11506	20427	20427	Undirected	杜淑純	杜祖健	杜聰明家族	杜聰明家族	hasBrother
11503	11507	20427	20427	Undirected	杜淑純	杜祖智	杜聰明家族	杜聰明家族	hasBrother
11503	11508	20427	20427	Undirected	杜淑純	杜祖誠	杜聰明家族	杜聰明家族	hasBrother
11504	11509	20427	20427	Undirected	杜生財	杜聰明	杜聰明家族	杜聰明家族	hasBrother
11505	11506	20427	20427	Undirected	杜祖信	杜祖健	杜聰明家族	杜聰明家族	hasBrother
11505	11507	20427	20427	Undirected	杜祖信	杜祖智	杜聰明家族	杜聰明家族	hasBrother
11505	11508	20427	20427	Undirected	杜祖信	杜祖誠	杜聰明家族	杜聰明家族	hasBrother
11506	11507	20427	20427	Undirected	杜祖健	杜祖智	杜聰明家族	杜聰明家族	hasBrother
11506	11508	20427	20427	Undirected	杜祖健	杜祖誠	杜聰明家族	杜聰明家族	hasBrother
11507	11508	20427	20427	Undirected	杜祖智	杜祖誠	杜聰明家族	杜聰明家族	hasBrother
11512	11516	20442	20442	Undirected	林世棻	林世閎	林大波家族	林大波家族	hasBrother
11513	11516	20442	20442	Undirected	林世欣	林世閎	林大波家族	林大波家族	hasBrother
11514	11933	20446	20446	Undirected	林世珣	林澤灝	林定邦家系	林定邦家系	hasBrother
11515	11933	20446	20446	Undirected	林世琛	林澤灝	林定邦家系	林定邦家系	hasBrother
11517	11518	20446	20446	Undirected	林中堅	林中寬	林定邦家系	林定邦家系	hasBrother
11517	11519	20446	20446	Undirected	林中堅	林中秀	林定邦家系	林定邦家系	hasBrother
11519	11518	20446	20446	Undirected	林中秀	林中寬	林定邦家系	林定邦家系	hasBrother
11520	11561	20479	20479	Undirected	林久翔	林修禾	林清文家族	林清文家族	hasBrother
11523	11588	20506	20506	Undirected	林于文	林則禹	林維讓家系	林維讓家系	hasBrother
11524	11757	20498	20498	Undirected	林于昉	林愷碩	林秋江家族	林秋江家族	hasBrother
11527	11529	20513	20513	Undirected	林人哲	林人權	林自西家系	林自西家系	hasBrother
11530	11529	20513	20513	Undirected	林人理	林人權	林自西家系	林自西家系	hasBrother
11531	11529	20513	20513	Undirected	林人程	林人權	林自西家系	林自西家系	hasBrother
11532	11529	20513	20513	Undirected	林人芽	林人權	林自西家系	林自西家系	hasBrother
11533	11846	20506	20506	Undirected	林仁及	林本仁	林維讓家系	林維讓家系	hasBrother
11535	11523	20506	20506	Undirected	林介今	林于文	林維讓家系	林維讓家系	hasBrother
11535	11588	20506	20506	Undirected	林介今	林則禹	林維讓家系	林維讓家系	hasBrother
11536	11537	20431	20431	Undirected	林仲平	林仲江	林伯奏家族	林伯奏家族	hasBrother
11536	11538	20431	20431	Undirected	林仲平	林仲秋	林伯奏家族	林伯奏家族	hasBrother
11537	11538	20431	20431	Undirected	林仲江	林仲秋	林伯奏家族	林伯奏家族	hasBrother
11539	11654	20446	20446	Undirected	林仲衡	林子佩	林定邦家系	林定邦家系	hasBrother
11539	11902	20446	20446	Undirected	林仲衡	林永貞	林定邦家系	林定邦家系	hasBrother
11539	11972	20446	20446	Undirected	林仲衡	林瑞騰	林定邦家系	林定邦家系	hasBrother
11539	11999	20446	20446	Undirected	林仲衡	林祖密	林定邦家系	林定邦家系	hasBrother
11541	12217	20504	20504	Undirected	林佩娜	林雍	林維德家系	林維德家系	hasBrother
11542	11901	20455	20455	Undirected	林佩璇	林永宗	林慶祥家族	林慶祥家族	hasBrother
11543	12217	20504	20504	Undirected	林佩莉	林雍	林維德家系	林維德家系	hasBrother
11544	11730	20460	20453	Undirected	林佳瑾	林怡呈	林政雄家族	林怡呈家族	hasBrother
11545	11730	20460	20453	Undirected	林佳穎	林怡呈	林政雄家族	林怡呈家族	hasBrother
11546	11547	20479	20479	Undirected	林佾康	林佾廷	林清文家族	林清文家族	hasBrother
11546	11548	20479	20479	Undirected	林佾康	林佾洲	林清文家族	林清文家族	hasBrother
11546	11549	20479	20479	Undirected	林佾康	林佾魁	林清文家族	林清文家族	hasBrother
11547	11548	20479	20479	Undirected	林佾廷	林佾洲	林清文家族	林清文家族	hasBrother
11548	11549	20479	20479	Undirected	林佾洲	林佾魁	林清文家族	林清文家族	hasBrother
11549	11547	20479	20479	Undirected	林佾魁	林佾廷	林清文家族	林清文家族	hasBrother
11550	11583	20446	20446	Undirected	林來旺	林其耀	林定邦家系	林定邦家系	hasBrother
11550	11905	20446	20446	Undirected	林來旺	林沂茂	林定邦家系	林定邦家系	hasBrother
11552	11553	20505	20505	Undirected	林俊偉	林俊成	林維源家系	林維源家系	hasBrother
11552	11554	20505	20505	Undirected	林俊偉	林俊立	林維源家系	林維源家系	hasBrother
11552	11555	20505	20505	Undirected	林俊偉	林俊茂	林維源家系	林維源家系	hasBrother
11552	11556	20505	20505	Undirected	林俊偉	林俊賢	林維源家系	林維源家系	hasBrother
11552	11557	20505	20505	Undirected	林俊偉	林俊輝	林維源家系	林維源家系	hasBrother
11552	11558	20505	20505	Undirected	林俊偉	林俊雄	林維源家系	林維源家系	hasBrother
11552	11598	20505	20505	Undirected	林俊偉	林化龍	林維源家系	林維源家系	hasBrother
11553	11554	20505	20505	Undirected	林俊成	林俊立	林維源家系	林維源家系	hasBrother
11553	11555	20505	20505	Undirected	林俊成	林俊茂	林維源家系	林維源家系	hasBrother
11553	11556	20505	20505	Undirected	林俊成	林俊賢	林維源家系	林維源家系	hasBrother
11553	11557	20505	20505	Undirected	林俊成	林俊輝	林維源家系	林維源家系	hasBrother
11553	11558	20505	20505	Undirected	林俊成	林俊雄	林維源家系	林維源家系	hasBrother
11553	11598	20505	20505	Undirected	林俊成	林化龍	林維源家系	林維源家系	hasBrother
11554	11555	20505	20505	Undirected	林俊立	林俊茂	林維源家系	林維源家系	hasBrother
11554	11556	20505	20505	Undirected	林俊立	林俊賢	林維源家系	林維源家系	hasBrother
11554	11557	20505	20505	Undirected	林俊立	林俊輝	林維源家系	林維源家系	hasBrother
11554	11558	20505	20505	Undirected	林俊立	林俊雄	林維源家系	林維源家系	hasBrother
11554	11598	20505	20505	Undirected	林俊立	林化龍	林維源家系	林維源家系	hasBrother
11555	11556	20505	20505	Undirected	林俊茂	林俊賢	林維源家系	林維源家系	hasBrother
11555	11557	20505	20505	Undirected	林俊茂	林俊輝	林維源家系	林維源家系	hasBrother
11555	11558	20505	20505	Undirected	林俊茂	林俊雄	林維源家系	林維源家系	hasBrother
11555	11598	20505	20505	Undirected	林俊茂	林化龍	林維源家系	林維源家系	hasBrother
11556	11557	20505	20505	Undirected	林俊賢	林俊輝	林維源家系	林維源家系	hasBrother
11556	11558	20505	20505	Undirected	林俊賢	林俊雄	林維源家系	林維源家系	hasBrother
11556	11598	20505	20505	Undirected	林俊賢	林化龍	林維源家系	林維源家系	hasBrother
11557	11558	20505	20505	Undirected	林俊輝	林俊雄	林維源家系	林維源家系	hasBrother
11557	11598	20505	20505	Undirected	林俊輝	林化龍	林維源家系	林維源家系	hasBrother
11558	11598	20505	20505	Undirected	林俊雄	林化龍	林維源家系	林維源家系	hasBrother
11560	12095	20458	20458	Undirected	林修寬	林蔚山	林挺生家系	林挺生家系	hasBrother
11560	12096	20458	20458	Undirected	林修寬	林蔚東	林挺生家系	林挺生家系	hasBrother
11560	12200	20458	20458	Undirected	林修寬	林鎮弘	林挺生家系	林挺生家系	hasBrother
11560	12201	20458	20458	Undirected	林修寬	林鎮源	林挺生家系	林挺生家系	hasBrother
11560	12202	20458	20458	Undirected	林修寬	林鎮華	林挺生家系	林挺生家系	hasBrother
11563	12095	20458	20458	Undirected	林倫寬	林蔚山	林挺生家系	林挺生家系	hasBrother
11563	12096	20458	20458	Undirected	林倫寬	林蔚東	林挺生家系	林挺生家系	hasBrother
11563	12200	20458	20458	Undirected	林倫寬	林鎮弘	林挺生家系	林挺生家系	hasBrother
11563	12201	20458	20458	Undirected	林倫寬	林鎮源	林挺生家系	林挺生家系	hasBrother
11563	12202	20458	20458	Undirected	林倫寬	林鎮華	林挺生家系	林挺生家系	hasBrother
11565	12155	20446	20446	Undirected	林元標	林資興	林定邦家系	林定邦家系	hasBrother
11566	12198	20485	20485	Undirected	林光正	林鍾正	林獻堂家系	林獻堂家系	hasBrother
11567	11701	20485	20485	Undirected	林光華	林崇嚴	林獻堂家系	林獻堂家系	hasBrother
11567	11703	20485	20485	Undirected	林光華	林崇巖	林獻堂家系	林獻堂家系	hasBrother
11567	12000	20485	20485	Undirected	林光華	林禹承	林獻堂家系	林獻堂家系	hasBrother
11567	12048	20485	20485	Undirected	林光華	林耀華	林獻堂家系	林獻堂家系	hasBrother
11569	11589	20505	20505	Undirected	林克恭	林剛義	林維源家系	林維源家系	hasBrother
11569	11697	20505	20505	Undirected	林克恭	林履信	林維源家系	林維源家系	hasBrother
11569	11704	20505	20505	Undirected	林克恭	林崇智	林維源家系	林維源家系	hasBrother
11569	11726	20505	20505	Undirected	林克恭	林志寬	林維源家系	林維源家系	hasBrother
11569	11826	20505	20505	Undirected	林克恭	林景仁	林維源家系	林維源家系	hasBrother
11569	12270	20505	20505	Undirected	林克恭	林鼎禮	林維源家系	林維源家系	hasBrother
11571	11572	20087	20087	Undirected	林全忠	林全成	台南林家家系	台南林家家系	hasBrother
11571	11573	20087	20087	Undirected	林全忠	林全祿	台南林家家系	台南林家家系	hasBrother
11571	11574	20087	20087	Undirected	林全忠	林全福	台南林家家系	台南林家家系	hasBrother
11571	11576	20087	20087	Undirected	林全忠	林全義	台南林家家系	台南林家家系	hasBrother
11571	11577	20087	20087	Undirected	林全忠	林全興	台南林家家系	台南林家家系	hasBrother
11571	11578	20087	20087	Undirected	林全忠	林全藻	台南林家家系	台南林家家系	hasBrother
11571	11579	20087	20087	Undirected	林全忠	林全金	台南林家家系	台南林家家系	hasBrother
11572	11573	20087	20087	Undirected	林全成	林全祿	台南林家家系	台南林家家系	hasBrother
11572	11574	20087	20087	Undirected	林全成	林全福	台南林家家系	台南林家家系	hasBrother
11572	11576	20087	20087	Undirected	林全成	林全義	台南林家家系	台南林家家系	hasBrother
11572	11577	20087	20087	Undirected	林全成	林全興	台南林家家系	台南林家家系	hasBrother
11572	11578	20087	20087	Undirected	林全成	林全藻	台南林家家系	台南林家家系	hasBrother
11572	11579	20087	20087	Undirected	林全成	林全金	台南林家家系	台南林家家系	hasBrother
11573	11574	20087	20087	Undirected	林全祿	林全福	台南林家家系	台南林家家系	hasBrother
11573	11576	20087	20087	Undirected	林全祿	林全義	台南林家家系	台南林家家系	hasBrother
11573	11577	20087	20087	Undirected	林全祿	林全興	台南林家家系	台南林家家系	hasBrother
11573	11578	20087	20087	Undirected	林全祿	林全藻	台南林家家系	台南林家家系	hasBrother
11573	11579	20087	20087	Undirected	林全祿	林全金	台南林家家系	台南林家家系	hasBrother
11574	11576	20087	20087	Undirected	林全福	林全義	台南林家家系	台南林家家系	hasBrother
11574	11577	20087	20087	Undirected	林全福	林全興	台南林家家系	台南林家家系	hasBrother
11574	11578	20087	20087	Undirected	林全福	林全藻	台南林家家系	台南林家家系	hasBrother
11574	11579	20087	20087	Undirected	林全福	林全金	台南林家家系	台南林家家系	hasBrother
11576	11577	20087	20087	Undirected	林全義	林全興	台南林家家系	台南林家家系	hasBrother
11576	11578	20087	20087	Undirected	林全義	林全藻	台南林家家系	台南林家家系	hasBrother
11576	11579	20087	20087	Undirected	林全義	林全金	台南林家家系	台南林家家系	hasBrother
11577	11578	20087	20087	Undirected	林全興	林全藻	台南林家家系	台南林家家系	hasBrother
11577	11579	20087	20087	Undirected	林全興	林全金	台南林家家系	台南林家家系	hasBrother
11578	11579	20087	20087	Undirected	林全藻	林全金	台南林家家系	台南林家家系	hasBrother
11580	12182	20087	20087	Undirected	林八郎	林錫俊	台南林家家系	台南林家家系	hasBrother
11580	12183	20087	20087	Undirected	林八郎	林錫南	台南林家家系	台南林家家系	hasBrother
11580	12185	20087	20087	Undirected	林八郎	林錫川	台南林家家系	台南林家家系	hasBrother
11580	12186	20087	20087	Undirected	林八郎	林錫東	台南林家家系	台南林家家系	hasBrother
11580	12190	20087	20087	Undirected	林八郎	林錫泉	台南林家家系	台南林家家系	hasBrother
11580	12191	20087	20087	Undirected	林八郎	林錫湖	台南林家家系	台南林家家系	hasBrother
11580	12193	20087	20087	Undirected	林八郎	林錫珍	台南林家家系	台南林家家系	hasBrother
11580	12194	20087	20087	Undirected	林八郎	林錫瑞	台南林家家系	台南林家家系	hasBrother
11581	12207	20506	20506	Undirected	林公世	林開世	林維讓家系	林維讓家系	hasBrother
11582	11606	20485	20485	Undirected	林公子	林博正	林獻堂家系	林獻堂家系	hasBrother
11582	11778	20485	20485	Undirected	林公子	林政光	林獻堂家系	林獻堂家系	hasBrother
11582	11779	20485	20485	Undirected	林公子	林政吉	林獻堂家系	林獻堂家系	hasBrother
11582	11782	20485	20485	Undirected	林公子	林政忠	林獻堂家系	林獻堂家系	hasBrother
11582	11821	20485	20485	Undirected	林公子	林昭汎	林獻堂家系	林獻堂家系	hasBrother
11583	11905	20446	20446	Undirected	林其耀	林沂茂	林定邦家系	林定邦家系	hasBrother
11584	11585	20489	20489	Undirected	林冠中	林冠仁	林瑞光家族	林瑞光家族	hasBrother
11589	11697	20505	20505	Undirected	林剛義	林履信	林維源家系	林維源家系	hasBrother
11589	11704	20505	20505	Undirected	林剛義	林崇智	林維源家系	林維源家系	hasBrother
11589	11726	20505	20505	Undirected	林剛義	林志寬	林維源家系	林維源家系	hasBrother
11589	11826	20505	20505	Undirected	林剛義	林景仁	林維源家系	林維源家系	hasBrother
11589	12270	20505	20505	Undirected	林剛義	林鼎禮	林維源家系	林維源家系	hasBrother
11590	12211	20518	20518	Undirected	林加添	林阿東	林蚶家族	林蚶家族	hasBrother
11591	11592	20504	20504	Undirected	林勃	林勔	林維德家系	林維德家系	hasBrother
11591	11594	20504	20504	Undirected	林勃	林勣	林維德家系	林維德家系	hasBrother
11591	11595	20504	20504	Undirected	林勃	林勤	林維德家系	林維德家系	hasBrother
11591	11596	20504	20504	Undirected	林勃	林勱	林維德家系	林維德家系	hasBrother
11591	11597	20504	20504	Undirected	林勃	林勳	林維德家系	林維德家系	hasBrother
11592	11594	20504	20504	Undirected	林勔	林勣	林維德家系	林維德家系	hasBrother
11592	11595	20504	20504	Undirected	林勔	林勤	林維德家系	林維德家系	hasBrother
11592	11596	20504	20504	Undirected	林勔	林勱	林維德家系	林維德家系	hasBrother
11592	11597	20504	20504	Undirected	林勔	林勳	林維德家系	林維德家系	hasBrother
11594	11595	20504	20504	Undirected	林勣	林勤	林維德家系	林維德家系	hasBrother
11594	11596	20504	20504	Undirected	林勣	林勱	林維德家系	林維德家系	hasBrother
11594	11597	20504	20504	Undirected	林勣	林勳	林維德家系	林維德家系	hasBrother
11595	11596	20504	20504	Undirected	林勤	林勱	林維德家系	林維德家系	hasBrother
11595	11597	20504	20504	Undirected	林勤	林勳	林維德家系	林維德家系	hasBrother
11596	11597	20504	20504	Undirected	林勱	林勳	林維德家系	林維德家系	hasBrother
11601	11603	20505	20505	Undirected	林南星	林南璧	林維源家系	林維源家系	hasBrother
11601	11725	20505	20505	Undirected	林南星	林德玄	林維源家系	林維源家系	hasBrother
11601	12178	20505	20505	Undirected	林南星	林金銓	林維源家系	林維源家系	hasBrother
11602	11601	20505	20505	Undirected	林南溟	林南星	林維源家系	林維源家系	hasBrother
11602	11603	20505	20505	Undirected	林南溟	林南璧	林維源家系	林維源家系	hasBrother
11602	11725	20505	20505	Undirected	林南溟	林德玄	林維源家系	林維源家系	hasBrother
11602	12178	20505	20505	Undirected	林南溟	林金銓	林維源家系	林維源家系	hasBrother
11603	11725	20505	20505	Undirected	林南璧	林德玄	林維源家系	林維源家系	hasBrother
11603	12178	20505	20505	Undirected	林南璧	林金銓	林維源家系	林維源家系	hasBrother
11604	11809	20506	20506	Undirected	林南英	林方世	林維讓家系	林維讓家系	hasBrother
11605	11738	20482	20482	Undirected	林南薰	林悟石	林濁水家族	林濁水家族	hasBrother
11605	11888	20482	20482	Undirected	林南薰	林正欣	林濁水家族	林濁水家族	hasBrother
11606	11778	20485	20485	Undirected	林博正	林政光	林獻堂家系	林獻堂家系	hasBrother
11606	11779	20485	20485	Undirected	林博正	林政吉	林獻堂家系	林獻堂家系	hasBrother
11606	11782	20485	20485	Undirected	林博正	林政忠	林獻堂家系	林獻堂家系	hasBrother
11606	11821	20485	20485	Undirected	林博正	林昭汎	林獻堂家系	林獻堂家系	hasBrother
11609	11608	20440	20440	Undirected	林呈禎	林呈祿	林呈祿家系	林呈祿家系	hasBrother
11610	11612	20446	20446	Undirected	林和平	林啓東	林定邦家系	林定邦家系	hasBrother
11611	11529	20513	20513	Undirected	林和美	林人權	林自西家系	林自西家系	hasBrother
11614	11616	20505	20505	Undirected	林國仁	林國棟	林維源家系	林維源家系	hasBrother
11614	11618	20505	20505	Undirected	林國仁	林國芳	林維源家系	林維源家系	hasBrother
11614	11619	20505	20505	Undirected	林國仁	林國英	林維源家系	林維源家系	hasBrother
11614	11621	20505	20505	Undirected	林國仁	林國華-1	林維源家系	林維源家系	hasBrother
11615	11620	20479	20506	Undirected	林國峰	林國華	林清文家族	林維讓家系	hasBrother
11616	11618	20505	20505	Undirected	林國棟	林國芳	林維源家系	林維源家系	hasBrother
11616	11619	20505	20505	Undirected	林國棟	林國英	林維源家系	林維源家系	hasBrother
11616	11621	20505	20505	Undirected	林國棟	林國華-1	林維源家系	林維源家系	hasBrother
11617	11615	20479	20479	Undirected	林國瑋	林國峰	林清文家族	林清文家族	hasBrother
11617	11620	20479	20506	Undirected	林國瑋	林國華	林清文家族	林維讓家系	hasBrother
11618	11619	20505	20505	Undirected	林國芳	林國英	林維源家系	林維源家系	hasBrother
11618	11621	20505	20505	Undirected	林國芳	林國華-1	林維源家系	林維源家系	hasBrother
11619	11621	20505	20505	Undirected	林國英	林國華-1	林維源家系	林維源家系	hasBrother
11622	11632	20446	20446	Undirected	林坤定	林培英	林定邦家系	林定邦家系	hasBrother
11622	11638	20446	20446	Undirected	林坤定	林太平	林定邦家系	林定邦家系	hasBrother
11622	11784	20446	20446	Undirected	林坤定	林政潮	林定邦家系	林定邦家系	hasBrother
11622	11890	20446	20446	Undirected	林坤定	林正熊	林定邦家系	林定邦家系	hasBrother
11622	12160	20446	20446	Undirected	林坤定	林逢源	林定邦家系	林定邦家系	hasBrother
11622	12167	20446	20446	Undirected	林坤定	林遠志	林定邦家系	林定邦家系	hasBrother
11622	12204	20446	20446	Undirected	林坤定	林長洪	林定邦家系	林定邦家系	hasBrother
11623	12244	20493	20493	Undirected	林坤山	林頂立	林真梓家族	林真梓家族	hasBrother
11624	11935	20441	20441	Undirected	林坤鐘	林濬哲	林坤鐘家族	林坤鐘家族	hasBrother
11625	11626	20485	20485	Undirected	林垂凱	林垂拱	林獻堂家系	林獻堂家系	hasBrother
11625	11628	20485	20485	Undirected	林垂凱	林垂珠	林獻堂家系	林獻堂家系	hasBrother
11625	11629	20485	20485	Undirected	林垂凱	林垂立	林獻堂家系	林獻堂家系	hasBrother
11625	11630	20485	20485	Undirected	林垂凱	林垂芳	林獻堂家系	林獻堂家系	hasBrother
11626	11628	20485	20485	Undirected	林垂拱	林垂珠	林獻堂家系	林獻堂家系	hasBrother
11626	11629	20485	20485	Undirected	林垂拱	林垂立	林獻堂家系	林獻堂家系	hasBrother
11626	11630	20485	20485	Undirected	林垂拱	林垂芳	林獻堂家系	林獻堂家系	hasBrother
11627	11631	20485	20485	Undirected	林垂明	林垂訓	林獻堂家系	林獻堂家系	hasBrother
11628	11629	20485	20485	Undirected	林垂珠	林垂立	林獻堂家系	林獻堂家系	hasBrother
11628	11630	20485	20485	Undirected	林垂珠	林垂芳	林獻堂家系	林獻堂家系	hasBrother
11629	11630	20485	20485	Undirected	林垂立	林垂芳	林獻堂家系	林獻堂家系	hasBrother
11632	11638	20446	20446	Undirected	林培英	林太平	林定邦家系	林定邦家系	hasBrother
11632	11784	20446	20446	Undirected	林培英	林政潮	林定邦家系	林定邦家系	hasBrother
11632	11890	20446	20446	Undirected	林培英	林正熊	林定邦家系	林定邦家系	hasBrother
11632	12160	20446	20446	Undirected	林培英	林逢源	林定邦家系	林定邦家系	hasBrother
11632	12167	20446	20446	Undirected	林培英	林遠志	林定邦家系	林定邦家系	hasBrother
11632	12204	20446	20446	Undirected	林培英	林長洪	林定邦家系	林定邦家系	hasBrother
11633	11634	20469	20469	Undirected	林堉琪	林堉璘	林榮三家系	林榮三家系	hasBrother
11633	11868	20469	20469	Undirected	林堉琪	林榮三	林榮三家系	林榮三家系	hasBrother
11634	11868	20469	20469	Undirected	林堉璘	林榮三	林榮三家系	林榮三家系	hasBrother
11635	12213	20485	20485	Undirected	林夔龍	林陸龍	林獻堂家系	林獻堂家系	hasBrother
11638	11784	20446	20446	Undirected	林太平	林政潮	林定邦家系	林定邦家系	hasBrother
11638	11890	20446	20446	Undirected	林太平	林正熊	林定邦家系	林定邦家系	hasBrother
11638	12160	20446	20446	Undirected	林太平	林逢源	林定邦家系	林定邦家系	hasBrother
11638	12167	20446	20446	Undirected	林太平	林遠志	林定邦家系	林定邦家系	hasBrother
11638	12204	20446	20446	Undirected	林太平	林長洪	林定邦家系	林定邦家系	hasBrother
11640	11684	20485	20446	Undirected	林奠國	林定邦	林獻堂家系	林定邦家系	hasBrother
11641	11633	20469	20469	Undirected	林好	林堉琪	林榮三家系	林榮三家系	hasBrother
11641	11634	20469	20469	Undirected	林好	林堉璘	林榮三家系	林榮三家系	hasBrother
11642	12055	20513	20513	Undirected	林如意	林自南	林自西家系	林自西家系	hasBrother
11642	12056	20513	20513	Undirected	林如意	林自東	林自西家系	林自西家系	hasBrother
11642	12057	20513	20513	Undirected	林如意	林自炎	林自西家系	林自西家系	hasBrother
11642	12058	20513	20513	Undirected	林如意	林自經	林自西家系	林自西家系	hasBrother
11642	12059	20513	20513	Undirected	林如意	林自西	林自西家系	林自西家系	hasBrother
11643	12055	20513	20513	Undirected	林如草	林自南	林自西家系	林自西家系	hasBrother
11643	12056	20513	20513	Undirected	林如草	林自東	林自西家系	林自西家系	hasBrother
11643	12057	20513	20513	Undirected	林如草	林自炎	林自西家系	林自西家系	hasBrother
11643	12058	20513	20513	Undirected	林如草	林自經	林自西家系	林自西家系	hasBrother
11643	12059	20513	20513	Undirected	林如草	林自西	林自西家系	林自西家系	hasBrother
[truncated: 10,427 more rows]

## Sheet: PersonID
	Person
10000	Dan_Bird
10001	JudyHillKornhoff
10002	Ricahrd_B._Palmer
10003	一青和枝
10004	丁一天
10005	丁世傑
10006	丁世豪
10007	丁仲翹
10008	丁伯雄
10009	丁叔豪
10010	丁唯農
10011	丁善玖
10012	丁善理
10013	丁善璽
10014	丁壽泉
10015	丁守中
10016	丁幼如
10017	丁廣伃
10018	丁廣儀
10019	丁廣欽
10020	丁廣鋐
10021	丁念莊
10022	丁桐
10023	丁榮松
10024	丁淳兒
10025	丁玲兒
10026	丁琴英
10027	丁瑞圖
10028	丁瑞彬
10029	丁瑞鉠
10030	丁瑞魚
10031	丁秀卿
10032	丁若夢
10033	丁逸民
10034	丁逸郎
10035	丁逸龍
10036	丁采芬
10037	丁采華
10038	丁采蘋
10039	丁采靜
10040	丁鈴兒
10041	丁錫勛
10042	丘健賓
10043	丘如秀
10044	丘如荔
10045	丘如華
10046	丘如雪
10047	丘廷亮
10048	丘廷德
10049	丘廷明
10050	丘秉敏
10051	丘秉煜
10052	中村泰江
10053	于一麗
10054	于心素
10055	于秉溪
10056	于素姍
10057	于葆理
10058	伊藤優子
10059	何京樺
10060	何佩娟
10061	何佩珊
10062	何佩珍
10063	何傳
10064	何其敏
10065	何冠德
10066	何培庭
10067	何壽山
10068	何壽川
10069	何奕佳
10070	何奕達
10071	何威德
10072	何季樺
10073	何宗英
10074	何宗達
10075	何宗龍
10076	何建廷
10077	何彩雲
10078	何惠珍
10079	何應楨
10080	何應欽
10081	何應祿
10082	何換治
10083	何政廷
10084	何敏廷
10085	何星輝
10086	何曜廷
10087	何森庭
10088	何榮庭
10089	何毓琰
10090	何永
10091	何玲春
10092	何瑞卿
10093	何皆來
10094	何碧珠
10095	何祈瑩
10096	何紹弇
10097	何紹徵
10098	何紹源
10099	何紹牧
10100	何紹珣
10101	何紹珪
10102	何紹瑤
10103	何紹璉
10104	何紹雄
10105	何縱炎
10106	何美卿
10107	何美慧
10108	何美慶
10109	何美昌
10110	何美育
10111	何美賢
10112	何義
10113	何耀輝
10114	何肇菁
10115	何蔭治
10116	何輯五
10117	何辜樺
10118	何重德
10119	何金
10120	何青樺
10121	何麗珠
10122	余佩玲
10123	余佳縈
10124	余佳臻
10125	余俊陞
10126	余傳韜
10127	余哲丞
10128	余家菊
10129	余政憲
10130	余政道
10131	余斐宇
10132	余永林
10133	余玫靜
10134	余玲惠
10135	余玲敏
10136	余玲莉
10137	余玲雅
10138	余珮瑛
10139	余瑞言
10140	余登發
10141	余綉鑾
10142	余若瑛
10143	余陳月瑛
10144	余鳳嬌
10145	依莉莎白奚斯
10146	侯全成
10147	侯博明
10148	侯博義
10149	侯博裕
10150	侯和順
10151	侯圖壽
10152	侯天儀
10153	侯如意
10154	侯平安
10155	侯德義
10156	侯敏英
10157	侯文仁
10158	侯文信
10159	侯文忠
10160	侯明伶
10161	侯書宗
10162	侯書德
10163	侯書文
10164	侯書正
10165	侯書武
10166	侯榮秋
10167	侯永松
10168	侯永都
10169	侯玉嫌
10170	侯瑞枝
10171	侯瑞瑋
10172	侯瑞瑾
10173	侯瑞穗
10174	侯瑞英
10175	侯盈足
10176	侯謝榴
10177	侯貴貞
10178	侯金柑
10179	侯金英
10180	侯金足
10181	侯銀月
10182	侯錫榮
10183	侯隆盛
10184	侯雨利
10185	侯青山
10186	侯青蓮
10187	俞啓威
10188	俞啓運
10189	俞大純
10190	俞大絪
10191	俞大維
10192	俞大綱
10193	俞大綵
10194	俞大綸
10195	俞大縝
10196	俞大绂
10197	俞小濟
10198	俞強聲
10199	俞志芳
10200	俞揚和
10201	俞政
10202	俞文淵
10203	俞方濟
10204	俞明詩
10205	俞明震
10206	俞明頤
10207	俞正聲
10208	俞祖聲
10209	倪健敏
10210	倪公北
10211	倪公炤
10212	倪哈奚斯
10213	倪安妮
10214	倪文亞
10215	倪桂珍
10216	倪美安
10217	倪美怡
10218	倪美皓
10219	偕以利
10220	偕叡廉
10221	偕瑪連
10222	傅仁軌
10223	傅企弘
10224	傅光賢
10225	傅文成
10226	傅斯年
10227	傅稜雅
10228	傅達成
10229	冷紹烇
10230	凌建民
10231	劉主安
10232	劉俊明
10233	劉俊杰
10234	劉偉德
10235	劉備世
10236	劉傳來
10237	劉傳況
10238	劉傳能
10239	劉兆英
10240	劉六五
10241	劉再生
10242	劉啓祥
10243	劉喬佳
10244	劉國康
10245	劉國昭
10246	劉國鎮
10247	劉培森
10248	劉壠
10249	劉大粒
10250	劉大衛
10251	劉大頌
10252	劉奕榮
10253	劉如霖
10254	劉子祥
10255	劉宇治
10256	劉寬平
10257	劉崇崑
10258	劉崇業
10259	劉廣斌
10260	劉延
10261	劉彩仁
10262	劉德勇
10263	劉德秦
10264	劉心心
10265	劉快治
10266	劉惠妍
10267	劉惠昭
10268	劉惠津
10269	劉惠瑛
10270	劉惠美
10271	劉惠麗
10272	劉慶理
10273	劉慶瑞
10274	劉憶如
10275	劉招英
10276	劉招華
10277	劉改造
10278	劉文岳
10279	劉文嶼
10280	劉文騰
10281	劉旺基
10282	劉昌善
10283	劉昌慶
10284	劉昌隆
10285	劉明
10286	劉明哲
10287	劉明朝
10288	劉明電
10289	劉昭惠
10290	劉會勝
10291	劉朝凱
10292	劉朝勝
10293	劉朝日
10294	劉朝瀚
10295	劉期純
10296	劉榮凱
10297	劉榮基
10298	劉榮宏
10299	劉榮寬
10300	劉榮精
10301	劉榮超
10302	劉榮顯
10303	劉正雄
10304	劉毓玲
10305	劉永強
10306	劉淑妙
10307	劉清井
10308	劉清川
10309	劉渝
10310	劉湄
10311	劉潤瑛
10312	劉炳中
10313	劉炳偉
10314	劉炳煌
10315	劉炳發
10316	劉炳華
10317	劉焜煌
10318	劉燦津
10319	劉玉英
10320	劉琨業
10321	劉瑞山
10322	劉瑞瑛
10323	劉瓊
10324	劉神嶽
10325	劉秀滿
10326	劉秀珒
10327	劉秀琴
10328	劉秀芬
10329	劉秀英
10330	劉秀華
10331	劉秀蓉
10332	劉秀薗
10333	劉秀霞
10334	劉笑
10335	劉篤信
10336	劉綺雪
10337	劉美惠
10338	劉美芳
10339	劉翠煥
10340	劉聆真
10341	劉聰慧
10342	劉若華
10343	劉茂霖
10344	劉莊
10345	劉蕙君
10346	劉謹治
10347	劉貞
10348	劉逸民
10349	劉邦雄
10350	劉郁瑛
10351	劉金
10352	劉銀
10353	劉錢
10354	劉錫五
10355	劉長順
10356	劉闊
10357	劉闊才
10358	劉雅各
10359	劉雲娥
10360	劉青和
10361	劉青江
10362	劉青波
10363	劉青眼
10364	劉青藜
10365	劉青雲
10366	劉青風
10367	劉革新
10368	劉順天
10369	劉順成
10370	劉顯世
10371	劉鴻彰
10372	劉鴻烈
10373	劉鴻誠
10374	劉鶴珊
10375	劉麒麟
10376	劉麟賜
10377	區永喜
10378	卓守
10379	卓雋
10380	卓高煊
10381	南寧芳
10382	古方南
10383	古稽堯
10384	史氏
10385	吉承之
10386	吉承俠
10387	吉承凱
10388	吉承勳
10389	吉承國
10390	吉承慶
10391	吉承斌
10392	吉承曼
10393	吉承蘭
10394	吉承進
10395	吉承邦
10396	吉承鏡
10397	吉承飛
10398	吉承麗
10399	吉章簡
10400	吉納維
10401	向新
10402	吳三連
10403	吳世雄
10404	吳京
10405	吳亮宏
10406	吳仁光
10407	吳仁和
10408	吳介文
10409	吳伯雄
10410	吳佩映
10411	吳俊傑
10412	吳俊民
10413	吳俊陞
10414	吳俊雄
10415	吳修齊
10416	吳元軒
10417	吳克明
10418	吳克明-1
10419	吳克用
10420	吳克章
10421	吳克讀
10422	吳凱民
10423	吳卓映
10424	吳吉利
10425	吳和光
10426	吳嘉興
10427	吳國雄
10428	吳培銓
10429	吳壁姿
10430	吳天惠
10431	吳天授
10432	吳天達
10433	吳如幸
10434	吳如月
10435	吳如淑
10436	吳如淳
10437	吳如玉
10438	吳如真
10439	吳如英
10440	吳如雪
10441	吳姿秀
10442	吳威德
10443	吳娟
10444	吳婉如
10445	吳婷婷
10446	吳孟原
10447	吳守禮
10448	吳守經
10449	吳宗原
10450	吳定原
10451	吳宛蓉
10452	吳富雄
10453	吳寬輝
10454	吳寶珠
10455	吳尊賢
10456	吳對
10457	吳小眉
10458	吳尚震
10459	吳崑崙
10460	吳帖
10461	吳平原
10462	吳平治
10463	吳幼林
10464	吳幼璋
10465	吳幼良
10466	吳建德
10467	吳弘貴
10468	吳得佑
10469	吳得民
10470	吳德原
10471	吳德暉
10472	吳德朗
10473	吳志偉
10474	吳志剛
10475	吳志宏
10476	吳志揚
10477	吳志良
10478	吳怡萍
10479	吳怡蓮
10480	吳成文
10481	吳成楷
10482	吳拜
10483	吳文光
10484	吳文慧
10485	吳文文
10486	吳文雄
10487	吳新英
10488	吳昌明
10489	吳明慧
10490	吳明珣
10491	吳明瑛
10492	吳明華
10493	吳昕威
10494	吳昕媛
10495	吳昕岳
10496	吳昕恩
10497	吳昕昌
10498	吳昕杰
10499	吳昕東
10500	吳昕紘
10501	吳昕豪
10502	吳昕達
10503	吳昕陽
10504	吳映
10505	吳映雪
10506	吳春甫
10507	吳昭男
10508	吳昭雄
10509	吳景徽
10510	吳景箕
10511	吳朝惠
10512	吳杏仙
10513	吳東亮
10514	吳東勝
10515	吳東憲
10516	吳東昇
10517	吳東明
10518	吳東權
10519	吳東泰
10520	吳東興
10521	吳東賢
10522	吳東進
10523	吳柚柑
10524	吳梅芬
10525	吳森森
10526	吳楚蘋
10527	吳榮原
10528	吳榮棣
10529	吳榮秋
10530	吳樂雲
10531	吳樹民
10532	吳欣儒
10533	吳欣盈
10534	吳正貴
10535	吳武雄
10536	吳永仁
10537	吳永仁-1
10538	吳永光
10539	吳永嘉
10540	吳永平
10541	吳永暉
10542	吳永熙
10543	吳汝祥
10544	吳汝翰
10545	吳泉
10546	吳淑女
10547	吳淑姿
10548	吳淑婉
10549	吳清美
10550	吳湘蘋
10551	吳源源
10552	吳滿治
10553	吳火獅
10554	吳玥玢
10555	吳珠如
10556	吳瑞乾
10557	吳瑞原
10558	吳瑞枝
10559	吳瑞美
10560	吳瑪珯
10561	吳璧玲
10562	吳白光
10563	吳皆欣
10564	吳真真
10565	吳碧香
10566	吳秋冬
10567	吳秋微
10568	吳秋玲
10569	吳立仁
10570	吳筱霞
10571	吳粉
10572	吳素娥
10573	吳美映
10574	吳美雲
10575	吳翰周
10576	吳芝生
10577	吳芳枝
10578	吳芳英
10579	吳若璋
10580	吳英姿
10581	吳英布
10582	吳英彪
10583	吳英辰
10584	吳英鶯
10585	吳華倫
10586	吳蕙蘭
10587	吳蘭芬
10588	吳蘭英
10589	吳謙謙
10590	吳貞良
10591	吳足
10592	吳辛原
10593	吳逸民
10594	吳運光
10595	吳運南
10596	吳運嘉
10597	吳運彰
10598	吳運明
10599	吳運東
10600	吳運豐
10601	吳運雄
10602	吳郁夫
10603	吳金台
10604	吳金川
10605	吳金棗
10606	吳金虎
10607	吳金龍
10608	吳錫洋
10609	吳鍾
10610	吳鏡秋
10611	吳鐵城
10612	吳阿勉
10613	吳雅婷
10614	吳雪倫
10615	吳雪梅
10616	吳青青
10617	吳韻宜
10618	吳餘次郎
10619	吳餘礦
10620	吳鴻勳
10621	吳鴻森
10622	吳鴻烹
10623	吳鴻煎
10624	吳鴻爐
10625	吳鴻蒸
10626	吳鴻麒
10627	吳鴻麟
10628	吳鸞旂
10629	吳黎雪
10630	呂唇
10631	呂天欽
10632	呂天爵
10633	呂忠楠
10634	呂忠苓
10635	呂忠萍
10636	呂忠薇
10637	呂文珠
10638	呂春榮
10639	呂有文
10640	呂某
10641	呂泉生
10642	呂玫芬
10643	呂瓊玉
10644	呂瓊珍
10645	呂瓊珠
10646	呂瓊琚
10647	呂瓊瑤
10648	呂瓊芳
10649	呂瓊英
10650	呂瓊華
10651	呂阿墉
10652	呂阿昌
10653	呂阿炯
10654	呂鳳章
10655	周令侃
10656	周佛
10657	周信義
10658	周信雄
10659	周傅芳
10660	周博生
10661	周和惠
10662	周品慧
10663	周塗樹
10664	周婉華
10665	周安雄
10666	周宗熙
10667	周宗隆
10668	周寶琴
10669	周敏益
10670	周文平
10671	周方初
10672	周旦
10673	周昇平
10674	周晴
10675	周東寶
10676	周查某
10677	周正剛
10678	周毓煒
10679	周法平
10680	周浚源
10681	周淑容
10682	周淑華
10683	周煥璋
10684	周玉禎
10685	周琪芬
10686	周瑜芬
10687	周瑞芬
10688	周瓊華
10689	周百鍊
10690	周碧
10691	周秀子
10692	周竹英
10693	周粉治
10694	周純如
10695	周素慧
10696	周素華
10697	周絳華
10698	周美惠
10699	周美慧
10700	周英才
10701	周豆粒
10702	周賢烈
10703	周錦雲
10704	周陳玉樹
10705	周靖華
10706	唐慧
10707	唐文元
10708	唐曉東
10709	唐桂芬
10710	唐漢元
10711	唐瑩
10712	唐紀渝
10713	唐縱
10714	唐美君
10715	唐雪東
10716	唐震東
10717	唐馥華
10718	商涼
10719	單氏
10720	嚴以德
10721	嚴仲熊
10722	嚴佾雲
10723	嚴倚雲
10724	嚴倬雲
10725	嚴停雲
10726	嚴僑
10727	嚴僖
10728	嚴克昌
10729	嚴大為
10730	嚴天心
10731	嚴天立
10732	嚴天音
10733	嚴孝京
10734	嚴孝媛
10735	嚴孝斌
10736	嚴孝武
10737	嚴孝秀
10738	嚴孝章
10739	嚴孝裕
10740	嚴孝誠
10741	嚴家宜
10742	嚴家昌
10743	嚴家淦
10744	嚴家玉
10745	嚴家珮
10746	嚴家聲
10747	嚴復
10748	嚴慈為
10749	嚴慶元
10750	嚴慶光
10751	嚴慶昭
10752	嚴慶棣
10753	嚴慶楨
10754	嚴慶炘
10755	嚴慶雲
10756	嚴方
10757	嚴正
10758	嚴為欣
10759	嚴為蓉
10760	嚴為薇
10761	嚴玷
10762	嚴琥
10763	嚴璆
10764	嚴璩
10765	嚴璸
10766	嚴璿
10767	嚴瓏
10768	嚴瓛
10769	嚴茲為
10770	嚴諒
10771	嚴雋同
10772	嚴雋安
10773	嚴雋建
10774	嚴雋森
10775	嚴雋榮
10776	嚴雋泰
10777	嚴雋芸
10778	嚴雋英
10779	嚴雋荃
10780	嚴雋菊
10781	嚴雋華
10782	嚴雋郁
10783	嚴頊
10784	嚴養和
10785	嚴鼎銘
10786	城九觀
10787	城仲模
10788	城偉峻
10789	城兆毅
10790	城兆緯
10791	城光財
10792	城呆
10793	城夭壽
10794	城忠志
10795	城惠畹
10796	城振銘
10797	城榮廷
10798	城江海
10799	城海瑞
10800	城淑賢
10801	城滿惠
10802	城炳模
10803	城燦松
10804	城燦桐
10805	城燦樹
10806	城燦煌
10807	城燦鉎
10808	城璧連
10809	城益男
10810	城碧環
10811	城祈安
10812	城祈福
10813	城紫雲
10814	城罔治
10815	城翠吟
10816	城謹治
10817	城貴霖
10818	城金
10819	城門
10820	城阿全
10821	城雅惠
10822	城雅美
10823	姚兆元
10824	姚奇偉
10825	姚奇凱
10826	姜宗望
10827	姜文緇
10828	姜文釗
10829	姜文鈞
10830	姜文鉞
10831	姜文銖
10832	姜文銘
10833	姜文錦
10834	姜紹謨
10835	姜蒓芳
10836	孔令侃
10837	孔令偉
10838	孔令傑
10839	孔令儀
10840	孔德麒
10841	孔祥熙
10842	季光明
10843	孫佩華
10844	孫冠華
10845	孫嘉琳
10846	孫嘉瑜
10847	孫國元
10848	孫國升
10849	孫國雄
10850	孫娫
10851	孫學成
10852	孫岱
10853	孫常勝
10854	孫德彰
10855	孫德芳
10856	孫慧英
10857	孫文
10858	孫景華
10859	孫桂香
10860	孫殿
10861	孫氏
10862	孫治平
10863	孫治強
10864	孫炳霖
10865	孫玫兒
10866	孫琴風
10867	孫璐華
10868	孫科
10869	孫穗英
10870	孫穗華
10871	孫素琴
10872	孫經驤
10873	孫美珍
10874	孫義宣
10875	孫自強
10876	孫若男
10877	孫葆棠
10878	孫藹齡
10879	孫觀成
10880	孫達成
10881	孫金琬
10882	孫黔
10883	宋其蘇
10884	宋壽壽
10885	宋子安
10886	宋子文
10887	宋子良
10888	宋孟果
10889	宋式倉
10890	宋慧玲
10891	宋慶齡
10892	宋文彬
10893	宋文恭
10894	宋文玲
10895	宋文雄
10896	宋明義
10897	宋時選
10898	宋林香
10899	宋漲林
10900	宋漲生
10901	宋燕詒
10902	宋瑞樓
10903	宋祥生
10904	宋維修
10905	宋維坤
10906	宋維堯
10907	宋美
10908	宋美齡
10909	宋翠玲
10910	宋耀如
10911	宋藹齡
10912	宋貞貞
10913	宋進英
10914	宗之珍
10915	容祺年
10916	容金善
10917	富惠
10918	尤清山
10919	尤進來
10920	居伯均
10921	居定賢
10922	居文
10923	居桂平
10924	居正
10925	居浩然
10926	居瀛玖
10927	居玟
10928	居禮
10929	居簡
10930	居美
10931	居蜜
10932	居龍
10933	山本和子
10934	山田博彥
10935	岑瑞琦
10936	川名健治
10937	巫宗源
10938	巫芳枝
10939	席德懋
10940	席曼英
10941	席裕強
10942	席裕英
10943	席鑑庭
10944	康寧祥
10945	康文彥
10946	廖塵美
10947	廖寶鶯
10948	廖文毅
10949	廖景福
10950	廖朝煌
10951	廖溫進
10952	廖溫音
10953	廖玉霜
10954	廖秀枝
10955	廖菊香
10956	廖運茂
10957	張世昌
10958	張世杰
10959	張丞模
10960	張仙平
10961	張令達
10962	張伯勳
10963	張伯欣
10964	張伯甫
10965	張伯翔
10966	張伯誠
10967	張信雄
10968	張倚竹
10969	張倚蘭
10970	張可欣
10971	張可欣-2
10972	張君勳
10973	張品三
10974	張品莊
10975	張哲碩
10976	張嘉璈
10977	張國瀏
10978	張園
10979	張天錫
10980	張如平
10981	張妏
10982	張妙瑛
10983	張媞
10984	張媽興
10985	張子武
10986	張孔穎
10987	張孝威
10988	張季強
10989	張安平
10990	張定民
10991	張定立
10992	張室宜
10993	張家信
10994	張家宜
10995	張家寬
10996	張家恭
10997	張家敏
10998	張家桹
10999	張家鈁
11000	張寶玉
11001	張小平
11002	張山鐘
11003	張嵐欣
11004	張幼俄
11005	張建國
11006	張建生
11007	張建祥
11008	張建邦
11009	張式真
11010	張式雲
11011	張德昌
11012	張心治
11013	張心洽
11014	張心滄
11015	張心漪
11016	張心澹
11017	張志偉
11018	張志豪
11019	張恩堉
11020	張恩榕
11021	張恩誠
11022	張意平
11023	張愛倫
11024	張慶輝
11025	張慶鎮
11026	張敏洞
11027	張敏璋
11028	張敏竑
11029	張敏鈺
11030	張敦復
11031	張敦華
11032	張文村
11033	張旦
11034	張春旺
11035	張春江
11036	張昭雄
11037	張晶晶
11038	張月李
11039	張月澄
11040	張月雲
11041	張杏如
11042	張東平
11043	張東紅
11044	張東華
11045	張東青
11046	張根泉
11047	張桂香
11048	張楣
11049	張榮喜
11050	張榮庭
11051	張樂怡
11052	張樂文
11053	張樂真
11054	張歐結
11055	張毓奇
11056	張永平
11057	張汝綸
11058	張添根
11059	張溫鷹
11060	張漢三
11061	張漢裕
11062	張炎元
11063	張炎虎
11064	張煥三
11065	張煥珪
11066	張照媛
11067	張燕
11068	張燦堂
11069	張玉惠
11070	張玉琴
11071	張玉鳳
11072	張玉齡
11073	張琴喨
11074	張申申
11075	張益周
11076	張知惠
11077	張石崇
11078	張碧雲
11079	張祖澤
11080	張祖超
11081	張福堂
11082	張福英
11083	張秀政
11084	張秀青
11085	張節子
11086	張素娥
11087	張紹南
11088	張絹絹
11089	張綠宇
11090	張緞
11091	張美惠
11092	張美玉
11093	張美絲
11094	張翊棟
11095	張翠玉
11096	張耀京
11097	張耀西
11098	張耀鋒
11099	張耀錡
11100	張耀龍
11101	張聘三
11102	張聰明
11103	張聰明-1
11104	張肇瀾
11105	張良穗
11106	張若
11107	張若華
11108	張莞卿
11109	張華欣
11110	張蓓蒂
11111	張裕屛
11112	張裕泰
11113	張詢卿
11114	張豐彥
11115	張豐緒
11116	張豐胤
11117	張超英
11118	張超雄
11119	張達三
11120	張選倩
11121	張邦珍
11122	張邦翰
11123	張錫華
11124	張阿園
11125	張阿園_次男
11126	張阿園_長男
11127	張雅琳
11128	張雅琴
11129	張雅絲
11130	張雨田
11131	張靖生
11132	張靜
11133	張驚聲
11134	張麗仙
11135	彥雋荃
11136	彭佳玉
11137	彭吟芳
11138	彭士佛
11139	彭士偉
11140	彭士孝
11141	彭士藏
11142	彭士蘋
11143	彭士貞
11144	彭孟緝
11145	彭常青
11146	彭戰存
11147	彭斐
11148	彭明哲
11149	彭明敏
11150	彭明輝
11151	彭晟
11152	彭植功
11153	彭淑媛
11154	彭清靠
11155	彭耀褱
11156	彭蔭剛
11157	彭蔭功
11158	彭蔭宣
11159	彭蔭川
11160	彭蔭時
11161	彭賜燈
11162	彭雪芬
11163	後藤具味
11164	徐乃錦
11165	徐之豐
11166	徐君樂
11167	徐學文
11168	徐小華
11169	徐干田
11170	徐志摩
11171	徐懷達
11172	徐明達
11173	徐正位
11174	徐正冠
11175	徐正己
11176	徐正新
11177	徐正材
11178	徐正泰
11179	徐正群
11180	徐正青
11181	徐清山
11182	徐美倫
11183	徐美媛
11184	徐美智
11185	徐美玟
11186	徐美玲
11187	徐美玲1
11188	徐美琴
11189	徐華斯
11190	徐萱
11191	徐訏
11192	徐贏洲
11193	徐辛盤
11194	徐錫麟
11195	徐風和
11196	徐風惠
11197	徐風楷
11198	徐風澤
11199	徐風謨
11200	徐鳳鳴
11201	徐龍雄
11202	應禮賢
11203	戴喜美
11204	戴壽美
11205	戴怡安
11206	戴怡德
11207	戴恩賽
11208	戴東原
11209	戴東生
11210	戴東雄
11211	戴炎輝
11212	戴瑞穗
11213	戴美玉
11214	戴鳳倚
11215	文心怡
11216	文衍正
11217	文衍誠
11218	文錫圭
11219	方世岳
11220	方仁欽
11221	方偉煌
11222	方恩緒
11223	方智寧
11224	方智怡
11225	方瑀
11226	方瑋
11227	方環
11228	方粵芳
11229	方美琴
11230	方聲恆
11231	方賢銘
11232	方雲祥
11233	施武華
11234	施江北
11235	施江南
11236	施江東
11237	施江西
11238	施玲玉
11239	施珊迪
11240	施瑞呈
11241	施瑤珍
11242	施璇璣
11243	施禮理
11244	施素筠
11245	施貞祥
11246	施雨鄉
11247	曹丁波
11248	曹亮吉
11249	曹倩
11250	曹妍
11251	曹恆平
11252	曹慧玲
11253	曹慧玲-1
11254	曹慧生
11255	曹文娟
11256	曹昌祺
11257	曹昌秀
11258	曹昌言
11259	曹欽源
11260	曹永和
11261	曹永坤
11262	曹永年
11263	曹永彥
11264	曹永祥
11265	曹永裕
11266	曹永達
11267	曹淑清
11268	曹玉梅
11269	曹理英
11270	曹美玉
11271	曹耀
11272	曹菊芬
11273	曹賜瑩
11274	曹賜璧
11275	曹郁芬
11276	曾伽因
11277	曾依仁
11278	曾國漢
11279	曾國潢
11280	曾國藩
11281	曾娟
11282	曾寶蓀
11283	曾廣珊
11284	曾廣璇
11285	曾廣祚
11286	曾廣鈞
11287	曾廣銓
11288	曾慶餘
11289	曾憲揆
11290	曾敏
11291	曾文勳
11292	曾文弘
11293	曾文惠
11294	曾文炳
11295	曾文耀
11296	曾文輝
11297	曾文雄
11298	曾昭掄
11299	曾昭柯
11300	曾昭楣
11301	曾昭美
11302	曾浴沂
11303	曾淑人
11304	曾淑慧
11305	曾炳奎
11306	曾炳輝
11307	曾玉枕
11308	曾玉璣
11309	曾玉霞
11310	曾玉鶯
11311	曾珠如
11312	曾瓊英
11313	曾石岳
11314	曾紀梁
11315	曾紀澤
11316	曾紀純
11317	曾紀芬
11318	曾紀鴻
11319	曾約農
11320	曾裕貞
11321	曾金澤
11322	曾雪鴻
11323	曾鴻基
11324	曾鴻文
11325	曾麗朱
11326	曾麗華
11327	朱世慶
11328	朱佩卿
11329	朱佩芳
11330	朱佩麗
11331	朱厚人
11332	朱吟
11333	朱四海
11334	朱娟蘭
11335	朱孟俐
11336	朱寬裕
11337	朱崑陽
11338	朱建堯
11339	朱建舜
11340	朱彩陽
11341	朱應三
11342	朱懷芳
11343	朱文俊
11344	朱文傑
11345	朱文儀
11346	朱文豪
11347	朱明陽
11348	朱昭陽
11349	朱智惠
11350	朱氏
11351	朱江淮
11352	朱滌生
11353	朱漢民
11354	朱瑞墉
11355	朱瑞庚
11356	朱秋月
11357	朱耀沂
11358	朱耀源
11359	朱華陽
11360	朱驕陽
11361	李世昌
11362	李乙樺
11363	李仲義
11364	李佩玲
11365	李兄愛
11366	李兆偉
11367	李光容
11368	李克溫
11369	李克鐘
11370	李効群
11371	李南
11372	李原宏
11373	李合珠
11374	李君晰
11375	李君曜
11376	李坤儀
11377	李增義
11378	李妙珠
11379	李婉然
11380	李嬌姿
11381	李嬌容
11382	李嬌麗
11383	李子彬
11384	李學睿
11385	李安妮
11386	李安娜
11387	李宗昌
11388	李宜靜
11389	李寶珠
11390	李崇禮
11391	李延昆
11392	李延禧
11393	李延齡
11394	李彥樞
11395	李彥頤
11396	李復禮
11397	李心培
11398	李惠汀
11399	李惠齡
11400	李慧嫻
11401	李慶煌
11402	李憲文
11403	李憲昌
11404	李憲明
11405	李承哲
11406	李招治
11407	李文三
11408	李文意
11409	李文雄
11410	李昆玉
11411	李昆耀
11412	李春生
11413	李昭仁
11414	李景盛
11415	李景隆
11416	李曾禮
11417	李會國
11418	李朝章
11419	李本勝
11420	李枝盈
11421	李棦
11422	李榮廷
11423	李榮龍
11424	李次建
11425	李正明
11426	李汝浩
11427	李治學
11428	李添枝
11429	李添盛
11430	李潤青
11431	李火木
11432	李火生
11433	李炳南
11434	李炳楠
11435	李焜培
11436	李玟靜
11437	李珍儀
11438	李琪美
11439	李瑞雲
11440	李璧娥
11441	李瓊梅
11442	李登欽
11443	李登輝
11444	李真真
11445	李真真-1
11446	李立安
11447	李純京
11448	李純子
11449	李純良
11450	李紹林
11451	李經馥
11452	李維仁
11453	李維禎
11454	李維興
11455	李緞
11456	李芬惠
11457	李芳惠
11458	李若蘭
11459	李英世
11460	李英明
11461	李英正
11462	李茂笙
11463	李荷
11464	李菱
11465	李蓮妹
11466	李蘭
11467	李行健
11468	李財生
11469	李超然
11470	李進興
11471	李逸琪
11472	李金基
11473	李金龍
11474	李錫福
11475	李鍾熙
11476	李鏡
11477	李開娥
11478	李開山
11479	李開榮
11480	李開胡
11481	李阿雪
11482	李青彧
11483	李靜妹
11484	李靜宜
11485	李韻秋
11486	李順子
11487	李順美
11488	李騰嶽
11489	李高盛
11490	李鳳儀
11491	李鳳彩
11492	李鳳盛
11493	李鳳美
11494	李鳳雀
11495	李鳳鳴
11496	李鳳鸞
11497	李鴻章
11498	李鶴章
11499	李麗珍
11500	李麗英
11501	杜家齊
11502	杜敏世
11503	杜淑純
11504	杜生財
11505	杜祖信
11506	杜祖健
11507	杜祖智
11508	杜祖誠
11509	杜聰明
11510	杜麗雪
11511	東良子
11512	林世棻
11513	林世欣
11514	林世珣
11515	林世琛
11516	林世閎
11517	林中堅
11518	林中寬
11519	林中秀
11520	林久翔
11521	林之助
11522	林亂
11523	林于文
11524	林于昉
11525	林亨
11526	林亮
11527	林人哲
11528	林人好
11529	林人權
11530	林人理
11531	林人程
11532	林人芽
11533	林仁及
11534	林仁布
11535	林介今
11536	林仲平
11537	林仲江
11538	林仲秋
11539	林仲衡
11540	林伯奏
11541	林佩娜
11542	林佩璇
11543	林佩莉
11544	林佳瑾
11545	林佳穎
11546	林佾康
11547	林佾廷
11548	林佾洲
11549	林佾魁
11550	林來旺
11551	林來進
11552	林俊偉
11553	林俊成
11554	林俊立
11555	林俊茂
11556	林俊賢
11557	林俊輝
11558	林俊雄
11559	林信廷
11560	林修寬
11561	林修禾
11562	林倫可
11563	林倫寬
11564	林偉生
11565	林元標
11566	林光正
11567	林光華
11568	林光輝
11569	林克恭
11570	林克明
11571	林全忠
11572	林全成
11573	林全祿
11574	林全福
11575	林全福-2
11576	林全義
11577	林全興
11578	林全藻
11579	林全金
11580	林八郎
11581	林公世
11582	林公子
11583	林其耀
11584	林冠中
11585	林冠仁
11586	林凱南
11587	林則徐
11588	林則禹
11589	林剛義
11590	林加添
11591	林勃
11592	林勔
11593	林勝美
11594	林勣
11595	林勤
11596	林勱
11597	林勳
11598	林化龍
11599	林千蕙
11600	林千鶴
11601	林南星
11602	林南溟
11603	林南璧
11604	林南英
11605	林南薰
11606	林博正
11607	林友媖
11608	林呈祿
11609	林呈禎
11610	林和平
11611	林和美
11612	林啓東
11613	林喜喜
11614	林國仁
11615	林國峰
11616	林國棟
11617	林國瑋
11618	林國芳
11619	林國英
11620	林國華
11621	林國華-1
11622	林坤定
11623	林坤山
11624	林坤鐘
11625	林垂凱
11626	林垂拱
11627	林垂明
11628	林垂珠
11629	林垂立
11630	林垂芳
11631	林垂訓
11632	林培英
11633	林堉琪
11634	林堉璘
11635	林夔龍
11636	林大波
11637	林天壽
11638	林太平
11639	林奇瑩
11640	林奠國
11641	林好
11642	林如意
11643	林如草
11644	林如閨
11645	林如𡢃
11646	林妙
11647	林妙真
11648	林威吉
11649	林娟妃
11650	林婉如
11651	林婉宜
11652	林嫦娥
11653	林嫻宜
11654	林子佩
11655	林子畏
11656	林存中
11657	林孝仁
11658	林孟丹
11659	林孟光
11660	林孟淑
11661	林孟玉
11662	林孟貴
11663	林孟雪
11664	林孟麗
11665	林學強
11666	林學淳
11667	林學淵
11668	林學濤
11669	林學良
11670	林安世
11671	林安琪
11672	林宏
11673	林宏亮
11674	林宏志
11675	林宏毅
11676	林宏祥
11677	林宏銘-1
11678	林宏鍊
11679	林宗德
11680	林宗慎
11681	林宗敬
11682	林宗毅
11683	林宗賢
11684	林定邦
11685	林宛嫻
11686	林富子
11687	林富美
11688	林富香
11689	林寶葉
11690	林小畹
11691	林少波
11692	林少薰
11693	林少鴻
11694	林少鵬
11695	林尚志
11696	林展川
11697	林履信
11698	林山青
11699	林崇仁
11700	林崇信
11701	林崇嚴
11702	林崇基
11703	林崇巖
11704	林崇智
11705	林崇正
11706	林崇民
11707	林嵩壽
11708	林希仁-1
11709	林希廉
11710	林幕安
11711	林幕蘭
11712	林平侯
11713	林幸宜
11714	林幸幸
11715	林幼春
11716	林建廷
11717	林建治
11718	林建生
11719	林彩娥
11720	林彭壽
11721	林徵龍
11722	林德俊
11723	林德傑
11724	林德成
11725	林德玄
11726	林志寬
11727	林忠
11728	林忠男
11729	林忠雄
11730	林怡呈
11731	林怡秀
11732	林恂
11733	林恆生
11734	林恆立
11735	林恆道
11736	林恩
11737	林悃
11738	林悟石
11739	林悰
11740	林惠如
11741	林惠宜
11742	林惠宜-1
11743	林惠柳
11744	林惠清
11745	林惠玉
11746	林惠玲
11747	林惠玲-1
11748	林惠璧
11749	林惠美
11750	林惠芳
11751	林惠芳-1
11752	林惠蘭
11753	林惠貞
11754	林愛玲
11755	林愫
11756	林愷
11757	林愷碩
11758	林慎
11759	林慎一
11760	林慕安
11761	林慕蘭
11762	林慡
11763	林慧
11764	林慧明
11765	林慶祥
11766	林慶章
11767	林憲明
11768	林懷民
11769	林我澤
11770	林扶世
11771	林振威
11772	林振金
11773	林挺生
11774	林捷龍
11775	林揚波
11776	林攀龍
11777	林政倫
11778	林政光
11779	林政吉
11780	林政君
11781	林政圻
11782	林政忠
11783	林政泰
11784	林政潮
11785	林政銘
11786	林政雄
11787	林敬傑
11788	林敬和
11789	林敬堯
11790	林敬義
11791	林文
11792	林文仁
11793	林文典
11794	林文察
11795	林文彥
11796	林文彩
11797	林文昌
11798	林文明
11799	林文月
11800	林文東
11801	林文欽
11802	林文珍
11803	林文約
11804	林文花
11805	林文英
11806	林文鳳
11807	林斯聰
11808	林方
11809	林方世
11810	林昂
11811	林昌世
11812	林明元
11813	林明弘
11814	林明德
11815	林明成
11816	林明洋
11817	林明聆
11818	林易
11819	林星斗
11820	林春蓮
11821	林昭汎
11822	林時櫻
11823	林晃
11824	林晉
11825	林普晴
11826	林景仁
11827	林晴美
11828	林曉
11829	林曜子
11830	林曦明
11831	林月波
11832	林月規
11833	林月霞
11834	林朝宗-1
11835	林朝宗-2
11836	林朝崧
11837	林朝成
11838	林朝斌
11839	林朝昌
11840	林朝棟
11841	林朝選
11842	林朝鑑
11843	林朝雍
11844	林木土
11845	林木桂
11846	林本仁
11847	林本庸
11848	林杉
11849	林東星
11850	林東淦
11851	林東谷
11852	林松壽
11853	林松齡
11854	林枚
11855	林柏壽
11856	林查某
11857	林根生
11858	林桂朱
11859	林桂靜
11860	林桃
11861	林桐
11862	林桑琴
11863	林梅
11864	林梓
11865	林楠
11866	林楨
11867	林楷
11868	林榮三
11869	林榮宗
11870	林槎
11871	林樑
11872	林樸
11873	林樹蘭
11874	林橫道
11875	林櫻
11876	林權
11877	林次雄
11878	林欣欣
11879	林歡邦
11880	林正凱
11881	林正勝
11882	林正吉
11883	林正奎
11884	林正子
11885	林正方
11886	林正昌
11887	林正昭
11888	林正欣
11889	林正澍
11890	林正熊
11891	林正直
11892	林正義
11893	林正翰
11894	林正賢
11895	林正金
11896	林正雄
11897	林正霈
11898	林正霖
11899	林毅晏
11900	林氏
11901	林永宗
11902	林永貞
11903	林永銘
11904	林永鑫
11905	林沂茂
11906	林河鑽
11907	林波堂
11908	林津梁
11909	林浩明
11910	林海塗
11911	林海達
11912	林淑娟
11913	林淑平
11914	林淑慎
11915	林淑慧
11916	林淑明
11917	林淑珠
11918	林淑祺
11919	林淑芬
11920	林淑貞
11921	林淑貞-1
11922	林淑貞-2
11923	林清文
11924	林溫如
11925	林滿
11926	林漢忠
11927	林漢瀛
11928	林漢章
11929	林漢錂
11930	林澄堂
11931	林澄枝
11932	林澄源
11933	林澤灝
11934	林濁水
11935	林濬哲
11936	林瀚東
11937	林為恭
11938	林烈堂
11939	林煌明
11940	林煥堂
11941	林煥清
11942	林熊光
11943	林熊徵
11944	林熊祥
11945	林燈煙
11946	林爲寬
11947	林爲樑
11948	林爾嘉
11949	林爾康
11950	林爾昌
11951	林牧民
11952	林物華
11953	林猶龍
11954	林獻堂
11955	林玉波
11956	林玉燕
11957	林玉環
11958	林玉美
11959	林玉芬
11960	林玉蓮
11961	林玲珠
11962	林珂
11963	林理美
11964	林琨
11965	林瑞光
11966	林瑞慧
11967	林瑞玲
11968	林瑞美
11969	林瑞貞
11970	林瑞鎔
11971	林瑞雲
11972	林瑞騰
11973	林瑾
11974	林瓊櫻
11975	林瓊珠
11976	林瓊瑤
11977	林瓊璋
11978	林瓊花
11979	林瓊雲
11980	林瓊霞
11981	林瓊鳶
11982	林用康
11983	林益謙
11984	林盡
11985	林省三
11986	林知佑
11987	林知延
11988	林知蔚
11989	林碧梧-1
11990	林碧玉
11991	林碧真
11992	林碧華
11993	林碧蓮
11994	林碧蕙
11995	林碧貞
11996	林碧霞
11997	林祐治
11998	林祖壽
[truncated: 2,703 more rows]

## Sheet: FamilyID
	Family
20000	Dan_Bird家族
20001	Kornhoff
20002	Ricahrd_B._Palmer家族
20003	一青和枝家族
20004	丁唯農家族
20005	丁守中家族
20006	丁念莊家族
20007	丁桐家族
20008	丁榮松家族
20009	丘健賓家族
20010	中村泰江家族
20011	于心素家族
20012	于秉溪家族
20013	于素姍家族
20014	于葆理家族
20015	伊藤優子家族
20016	何傳家系
20017	何宗英家族
20018	何彩雲家族
20019	何應欽家系
20020	何永家系
20021	何玲春家族
20022	何瑞卿家族
20023	何碧珠家族
20024	何義家系
20025	何耀輝家族
20026	何肇菁家族
20027	余佩玲家族
20028	余家菊家族
20029	余玫靜家族
20030	余登發家族
20031	余鳳嬌家族
20032	侯全成家族
20033	侯天儀家族
20034	侯德義家族
20035	侯雨利家系
20036	俞大維家系
20037	俞志芳家族
20038	俞政家族
20039	倪健敏家族
20040	倪哈奚斯家族
20041	倪安妮家族
20042	倪文亞家族
20043	倪桂珍家族
20044	傅企弘家族
20045	傅光賢家族
20046	傅斯年家族
20047	冷紹烇家族
20048	凌建民家族
20049	劉俊杰家族
20050	劉培森家族
20051	劉奕榮家族
20052	劉崇崑家族
20053	劉廣斌家族
20054	劉延家族
20055	劉惠美家族
20056	劉慶瑞家族
20057	劉文騰家族
20058	劉昌慶家族
20059	劉昌隆家族
20060	劉明朝家系
20061	劉會勝家族
20062	劉期純家族
20063	劉永強家族
20064	劉淑妙家族
20065	劉清川家族
20066	劉焜煌家族
20067	劉燦津家族
20068	劉琨業家族
20069	劉瓊家族
20070	劉笑家族
20071	劉綺雪家族
20072	劉茂霖家族
20073	劉莊家族
20074	劉長順家族
20075	劉闊家族
20076	劉闊才家系
20077	劉順天家族
20078	劉顯世家族
20079	劉麟賜家族
20080	區永喜家族
20081	卓守家族
20082	卓高煊家族
20083	南寧芳家族
20084	古稽堯家族
20085	台中陳家家系
20086	台南劉家家系
20087	台南林家家系
20088	台南高家家系
20089	台南黃家家系
20090	史氏家族
20091	吉章簡家族
20092	吉納維家族
20093	向新家族
20094	吳三連家族
20095	吳修齊家系
20096	吳吉利家族
20097	吳嘉興家族
20098	吳國雄家族
20099	吳培銓家族
20100	吳婷婷家族
20101	吳寬輝家族
20102	吳尚震家族
20103	吳幼璋家族
20104	吳德朗家族
20105	吳慶樂家族
20106	吳成文家族
20107	吳拜家族
20108	吳新英家族
20109	吳朝惠家族
20110	吳榮秋家族
20111	吳汝翰家族
20112	吳淑婉家族
20113	吳滿治家族
20114	吳火獅家系
20115	吳瑪珯家族
20116	吳皆欣家族
20117	吳真真家族
20118	吳碧香家族
20119	吳秋冬家族
20120	吳秋微家族
20121	吳秋玲家族
20122	吳秋菊家族
20123	吳筱霞家族
20124	吳粉家族
20125	吳翰周家族
20126	吳芝生家族
20127	吳英布家族
20128	吳英彪家族
20129	吳英鶯家族
20130	吳謙謙家族
20131	吳足家族
20132	吳金台家族
20133	吳鏡秋家族
20134	吳鐵城家族
20135	吳阿勉家族
20136	吳鸞旂家族
20137	呂唇家族
20138	呂文珠家族
20139	呂有文家族
20140	呂泉生家族
20141	呂玫芬家族
20142	呂鳳章家族
20143	周令侃家族
20144	周博生家族
20145	周寶琴家族
20146	周敏益家族
20147	周方初家族
20148	周旦家族
20149	周晴家族
20150	周東寶家族
20151	周查某家族
20152	周毓煒家族
20153	周浚源家族
20154	周淑容家族
20155	周煥璋家族
20156	周百鍊家系
20157	周碧家族
20158	周竹英家族
20159	周粉治家族
20160	周美惠家族
20161	周賢烈家族
20162	周陳玉樹家族
20163	周靖華家族
20164	唐慧家族
20165	唐瑩jiazu
20166	唐縱家族
20167	唐美君家族
20168	商涼j家族
20169	單氏家族
20170	嚴克昌家族
20171	嚴家淦家系
20172	嚴復家系
20173	嚴雋郁家族
20174	國泰蔡家家系
20175	城仲模家系
20176	姚兆元家族
20177	姜宗望家族
20178	姜紹謨家族
20179	姜蒓芳家族
20180	孔祥熙家族
20181	季光明家族
20182	孫大成家族
20183	孫德芳家族
20184	孫慧英家族
20185	孫景華家族
20186	孫桂香家族
20187	孫炳霖家族
20188	孫琴風家族
20189	孫素琴家族
20190	孫美珍家族
20191	孫自強家族
20192	孫若男家族
20193	孫葆棠家族
20194	宋其蘇家族
20195	宋孟果家族
20196	宋式倉家族
20197	宋燕詒家族
20198	宋美家系
20199	宋美齡家系
20200	宋進英家族
20201	宗之珍家族
20202	宜蘭陳家家系
20203	家族
20204	容祺年家族
20205	富惠家族
20206	尤清山家族
20207	尤進來家族
20208	居定賢家族
20209	山本和子家族
20210	山田博彥家族
20211	岑瑞琦家族
20212	川名健治家族
20213	巫宗源家族
20214	巫芳枝家族
20215	席曼英家族
20216	席鑑庭家族
20217	康寧祥家族
20218	廖塵美家族
20219	廖寶鶯家族
20220	廖文毅家族
20221	廖朝煌家族
20222	廖溫進家族
20223	廖溫音家族
20224	廖秀枝家族
20225	廖菊香家族
20226	廖運茂家族
20227	張信雄家族
20228	張園家族
20229	張天錫家族
20230	張妙瑛家族
20231	張媽興家族
20232	張子武家族
20233	張季強家族
20234	張家桹家族
20235	張家鈁家族
20236	張建生家族
20237	張建祥家族
20238	張建邦家系
20239	張式雲家族
20240	張德昌家族
20241	張慶鎮家族
20242	張敏鈺家族
20243	張文村家族
20244	張旦家族
20245	張春江家族
20246	張昭雄家族
20247	張晶晶家族
20248	張月雲家族
20249	張根泉家族
20250	張桂香家族
20251	張楣家族
20252	張榮喜家族
20253	張樂怡家族
20254	張歐結家族
20255	張添根家族
20256	張漢裕家族
20257	張炎元家族
20258	張炎虎家族
20259	張煥珪家族
20260	張燕家族
20261	張玉琴家系
20262	張玉鳳家族
20263	張玉齡家族
20264	張琴喨家族
20265	張申申家族
20266	張石崇家族
20267	張碧雲家族
20268	張祖澤家族
20269	張祖超家族
20270	張福堂家族
20271	張福英家族
20272	張節子家族
20273	張素娥家族
20274	張紹南家族
20275	張綠宇家族
20276	張美玉家族
20277	張翊棟家族
20278	張聰明-1家族
20279	張聰明家族
20280	張良穗家族
20281	張若華家族
20282	張豐緒家系
20283	張選倩家族
20284	張邦翰家族
20285	張阿園家族
20286	張雅琳家族
20287	張靖生家族
20288	張麗仙家族
20289	彥雋荃家族
20290	彭佳玉家族
20291	彭吟芳家族
20292	彭孟緝家族
20293	彭戰存家族
20294	彭斐家族
20295	彭明敏家系
20296	彭晟家族
20297	彭植功家族
20298	彭賜燈家族
20299	彭雪芬家族
20300	彰化銀行張伯欣家系
20301	後藤具味家族
20302	徐之豐家族
20303	徐志摩家族
20304	徐清山家族
20305	徐美琴家族
20306	徐華斯家族
20307	徐萱家族
20308	徐訏家族
20309	徐錫麟家族
20310	徐鳳鳴家族
20311	應禮賢家族
20312	戴恩賽家族
20313	戴瑞穗家族
20314	戴美玉家族
20315	戴鳳倚家族
20316	文錫圭家族
20317	新竹鄭家家系
20318	方仁欽家族
20319	方偉煌家族
20320	方恩緒家族
20321	方粵芳家族
20322	方聲恆家族
20323	方賢銘家族
20324	方雲祥家家族
20325	施武華家族
20326	施珊迪家族
20327	施瑞呈家族
20328	施瑤珍家族
20329	施素筠家族
20330	施貞祥家族
20331	施雨鄉家族
20332	曹丁波家族
20333	曹文娟家族
20334	曹永和家系
20335	曹耀家族
20336	曾依仁家族
20337	曾國藩家族
20338	曾憲揆家族
20339	曾文弘家族
20340	曾昭美家族
20341	曾淑慧家族
20342	曾玉枕家族
20343	曾珠如家族
20344	曾瓊英家族
20345	曾石岳家族
20346	曾裕貞家族
20347	曾雪鴻家族
20348	曾麗華家族
20349	朱世慶家族
20350	朱厚人家族
20351	朱娟蘭家族
20352	朱應三家族
20353	朱懷芳家族
20354	朱昭陽家系
20355	朱智惠家族
20356	朱氏家族
20357	朱漢民家族
20358	李乙樺家族
20359	李仲義家族
20360	李佩玲家族
20361	李兄愛家族
20362	李兆偉家族
20363	李光容家族
20364	李克溫家族
20365	李効群家族
20366	李南家族
20367	李原宏家族
20368	李合珠家族
20369	李子彬家族
20370	李學睿家族
20371	李宗昌家族
20372	李寶珠家族
20373	李崇禮家族
20374	李復禮家族
20375	李心培家族
20376	李惠汀家族
20377	李慶煌家族
20378	李招治家族
20379	李文三家族
20380	李文意家族
20381	李春生家族
20382	李昭仁家族
20383	李景隆家族
20384	李會國家族
20385	李朝章家族
20386	李本勝家族
20387	李枝盈家族
20388	李棦家族
20389	李榮廷家族
20390	李榮龍家族
20391	李次建家族
20392	李正明家族
20393	李汝浩家族
20394	李治學家族
20395	李添枝家族
20396	李清枝家族
20397	李清秋家族
20398	李火木家族
20399	李火生家族
20400	李焜培家族
20401	李珍儀家族
20402	李琪美家族
20403	李璧娥家族
20404	李登輝家系
20405	李真真-1家族
20406	李立安家族
20407	李純子家族
20408	李紹林家族
20409	李維仁家族
20410	李緞j家族
20411	李若蘭家族
20412	李茂笙家族
20413	李蓮妹家族
20414	李蘭家族
20415	李進興家族
20416	李逸琪家族
20417	李金基家族
20418	李鍾熙家族
20419	李鏡家族
20420	李阿雪家族
20421	李靜宜家族
20422	李韻秋家族
20423	李騰嶽家族
20424	李麗珍家族
20425	李麗英家族
20426	杜敏世家族
20427	杜聰明家族
20428	杜麗雪家族
20429	東良子家族
20430	林亂家族
20431	林伯奏家族
20432	林倫可家族
20433	林偉生家族
20434	林克明家族
20435	林則徐家族
20436	林劍清家族
20437	林勝美家族
20438	林千蕙家族
20439	林友媖家族
20440	林呈祿家系
20441	林坤鐘家族
20442	林大波家族
20443	林天壽家族
20444	林妙真家族
20445	林宏家族
20446	林定國家系
20447	林富子家族
20448	林富香家族
20449	林寶葉家族
20450	林山青家族
20451	林建廷家族
20452	林徵龍家族
20453	林怡呈家族
20454	林恆生家族
20455	林慶祥家族
20456	林我澤家族
20457	林振金家族
20458	林挺生家系
20459	林捷龍家族
20460	林政雄家族
20461	林敬義家族
20462	林斯聰家族
20463	林春蓮家族
20464	林月規家族
20465	林木土家族
20466	林木桂家族
20467	林本庸家族
20468	林桃家族
20469	林榮三家系
20470	林樹蘭家族
20471	林橫道家族
20472	林氏家族
20473	林永鑫家族
20474	林河鑽家族
20475	林淑平家族
20476	林淑慧家族
20477	林淑珠家族
20478	林淑芬家族
20479	林清文家族
20480	林溫如家族
20481	林澄源家族
20482	林濁水家族
20483	林煌明家族
20484	林燈煙家族
20485	林獻堂家系
20486	林玉芬家族
20487	林玲珠家族
20488	林理美家族
20489	林瑞光家族
20490	林瑞慧家族
20491	林瑞貞家族
20492	林瑞雲家族
20493	林真梓家族
20494	林碧蓮家族
20495	林秀卿-1家族
20496	林秀卿家族
20497	林秀馥家族
20498	林秋江家族
20499	林穎慧家族
20500	林篤勳家族
20501	林精麗家族
20502	林素雲家族
20503	林維修家族
20504	林維德家系
20505	林維源家系
20506	林維讓家系
20507	林綾孋家族
20508	林美惠家族
20509	林美津家族
20510	林翠鑾家族
20511	林耀福家族
20512	林耕陽家族
20513	林自西家系
20514	林芳郁家族
20515	林莊生家族
20516	林蕙娜家族
20517	林蕙婉家族
20518	林蚶家族
20519	林豐欽家族
20520	林迦家族
20521	林達文家族
20522	林邦勝家族
20523	林金鑾家族
20524	林阿春家族
20525	林雪治家族
20526	林雪琴家族
20527	林鳶英家族
20528	林麗卿家族
20529	林麗美家族
20530	柯瑤碧家族
20531	柯穆匏家族
20532	柯立橋家族
20533	柯維思家族
20534	柯良時家族
20535	桃園吳家家系
20536	梁其煙家族
20537	梁桂蘭家族
20538	梁漸英家族
20539	梁白玲家族
20540	梁金英家族
20541	梁麗嫻家族
20542	梁鼎銘家族
20543	楊克彰家族
20544	楊克智家族
20545	楊六合家族
20546	楊基銓家族
20547	楊大文家族
20548	楊嫦娥家族
20549	楊嬌家族
20550	楊子培家族
20551	楊子汀家族
20552	楊定一家族
20553	楊尾家族
20554	楊岫雲家族
20555	楊弘美家族
20556	楊惠昭家族
20557	楊惠玉家族
20558	楊新木家族
20559	楊晏然家族
20560	楊朝雲家族
20561	楊森家族
20562	楊次雄家族
20563	楊瑞華家族
20564	楊瑪琍家族
20565	楊祥發家族
20566	楊端儀家族
20567	楊素月家族
20568	楊素英家族
20569	楊維端家族
20570	楊繼先家族
20571	楊聯傑家族
20572	楊肇嘉家系
20573	楊芙蓉家族
20574	楊芝珊家族
20575	楊英英家族
20576	楊華玉家族
20577	楊藍洲家系
20578	楊許梅家族
20579	楊詠詩家族
20580	楊銹美家族
20581	楊錫侯家族
20582	楊鐵侯家族
20583	楊陵祥家族
20584	楊鴻游家族
20585	楊麗花家族
20586	樊曼儂家族
20587	歐陽培銓家族
20588	段輔堯家族
20589	毛人鳳家族
20590	毛思誠家族
20591	毛澤東家族
20592	毛贊廷家族
20593	毛鼎和家族
20594	水文梅家族
20595	江寶家族
20596	江彩雲家族
20597	江愛家族
20598	江氏家族
20599	江海泰家族
20600	江淑貞家族
20601	江濤家族
20602	江陽春家族
20603	江青家族
20604	池田君子家族
20605	汪捷三家族
20606	汪敬煦家族
20607	汪永汴家族
20608	汪褘成家族
20609	汪長詩家族
20610	沈信章家族
20611	沈君山家系
20612	沈孝先家族
20613	沈宗瀚家族
20614	沈明美家族
20615	沈曼麗家族
20616	沈燕士家族
20617	沈玲婷家族
20618	沈祈彰家族
20619	沈翰林家族
20620	沈葆楨家族
20621	沈長康家族
20622	沙正治家族
20623	油原哲夫家族
20624	津根靜香家族
20625	洪上琳家族
20626	洪伯元家族
20627	洪俊雄家族
20628	洪哲台家族
20629	洪壽南家族
20630	洪小貴家族
20631	洪恭逢家族
20632	洪文棟家族
20633	洪有達家族
20634	洪水龍家族
20635	洪碧梧家族
20636	洪秀華家族
20637	洪若惠家族
20638	洪蘭友家族
20639	洪貴美家族
20640	洪輝雄家族
20641	洪遜欣家系
20642	洪錦屏家族
20643	淡水洪家
20644	清水蔡惠如家系
20645	游彌堅家族
20646	溫應星家族
20647	溫洋一家族
20648	溫淑美家族
20649	溫靜如家族
20650	漢寶德家族
20651	潘允中家族
20652	潘執守家族
20653	潘影清家族
20654	潘秀華家族
20655	潘繡汝家族
20656	潘致祥家族
20657	潘貫家族
20658	潮田樂子家族
20659	烏絨家族
20660	焦淑英家族
20661	熊倉典子家族
20662	王世憲家族
20663	王乃三家族
20664	王伯群家族
20665	王俊明家族
20666	王傅芳家族
20667	王兆槐家族
20668	王友嫻家族
20669	王啓文家族
20670	王嘉申家族
20671	王圭容家族
20672	王外千家族
20673	王大蔚家族
20674	王天球家族
20675	王如璧家族
20676	王如芬家族
20677	王守仁家族
20678	王寶英家族
20679	王建庭家族
20680	王彩雲家族
20681	王念平家族
20682	王愛月家族
20683	王慶蓉家族
20684	王懿敏家族
20685	王政文家族
20686	王昌家族
20687	王榮壽家族
20688	王氏家族
20689	王永慶家系
20690	王淑女家族
20691	王琴家族
20692	王登全家族
20693	王秀家族
20694	王秀蓮家族
20695	王美修家族
20696	王美璉家族
20697	王致健家族
20698	王臻英家族
20699	王舅舅家族
20700	王芝香家族
20701	王英英家族
20702	王葆生家族
20703	王賡家族
20704	王賢甲家族
20705	王采玉家族
20706	王金成家族
20707	王釧如家族
20708	王錦霞家族
20709	王青山家族
20710	王麗卿家族
20711	王麗玉家族
20712	甘得中家系
20713	甘盡家族
20714	白崇禧家族
20715	白曉霞家族
20716	白秀雄家族
20717	白阿淑家族
20718	皮以書家族
20719	盛守白家族
20720	盛宣懷家族
20721	盧乖家族
20722	盧大偉家族
20723	盧安家族
20724	盧慕貞家族
20725	盧智超家族
20726	盧有都家族
20727	盧業竑家族
20728	盧英家族
20729	盧采貞家族
20730	盧願家族
20731	盧鳳尾家族
20732	石原光子家族
20733	石川治子家族
20734	石鳳翔家系
20735	神山澄子家族
20736	秦汾家族
20737	秦虹波家族
20738	程展家族
20739	章偉家族
20740	竺芝珊家族
20741	簡建勳家族
20742	簡建堂家族
20743	簡明仁家族
20744	簡淡月家族
20745	簡煥期家族
20746	簡碧霞家族
20747	粘龍音家族
20748	紀威廉家族
20749	紀陸驤家族
20750	紅上琳家族
20751	羅文堂家族
20752	羅月瑩家族
20753	羅次穎家族
20754	羅燦家族
20755	羅玉蘭家族
20756	羅萬俥家族
20757	羅蓮姿家族
20758	翁家族
20759	翁木家族
20760	翁瑞春家族
20761	翁紹煥家族
20762	翁翠君家族
20763	翁銘智家族
20764	翁麗娟家族
20765	翟炳祥家族
20766	聶爾康家族
20767	胡均發家族
20768	胡淑瑛家族
20769	胡秀文家族
20770	胡英祥家族
20771	胡雅香家族
20772	舒岸立家族
20773	范文華家族
20774	范青家族
20775	莊南田家族
20776	莊富淑家族
20777	莊志澄家族
20778	莊愛姬家族
20779	莊文英家族
20780	莊村誠家族
20781	莊榮榮家族
20782	莊琇鸞家族
20783	莊碧珠家族
20784	莊秋渠家族
20785	莊素貞家族
20786	莊維藩家族
20787	莊采芳家族
20788	華水華家族
20789	萬由陪家族
20790	萬祥瑛家族
20791	萬紹謀家族
20792	萬華呂家家系
20793	葉冬梅家族
20794	葉嘉猷家族
20795	葉如淳家庭
20796	葉宗達家族
20797	葉廷珪家族
20798	葉忠祐家族
20799	葉明勳家族
20800	葉桂采家族
20801	葉森家族
20802	葉榮秋家族
20803	葉款家族
20804	葉淑英家族
20805	葉清金家族
20806	葉炳松家族
20807	葉爾純家族
20808	葉祖堯家族
20809	葉英堃家族
20810	葉萬福家族
20811	葉貓貓家族
20812	葉貴恩家族
20813	葉雪珍家族
20814	葛玫
20815	葛珉家族
20816	董全壽家族
20817	董啓超家族
20818	董大成家族
20819	董孝誼家族
20820	董建華家系
20821	董忠司家族
20822	董春風家族
20823	董梨家族
20824	董炯鑫家族
20825	蔡串家族
20826	蔡培火家族
20827	蔡得一家族
20828	蔡惠媚家族
20829	蔡桂英家族
20830	蔡法平家族
20831	蔡湘蘋家族
20832	蔡碖家族
20833	蔡秀瓊家族
20834	蔡萬才家系
20835	蔡西坤家族
20836	蔡進季家族
20837	蔡道文家族
20838	蔡長庚家族
20839	蔣介石家系
20840	蔣友光家族
20841	蔣希嫻家族
20842	蔣平家族
20843	蔣承堯家族
20844	蔣渭水家族
20845	蔣福銘家族
20846	蔣苔蘭家族
20847	蕭安居家族
20848	蕭成美家族
20849	蕭潤家族
20850	蕭瑛華家族
20851	蕭秀淮家族
20852	蕭米容家族
20853	蕭紹賡家族
20854	蕭翠香家族
20855	薛福生家族
20856	薛聯寶家族
20857	薩摩斯家族
20858	藍以恪家族
20859	藍高全家族
20860	藍高川家族
20861	藤井愛子家族
20862	蘇厲珠家族
20863	蘇岡家族
20864	蘇成仁家族
20865	蘇承邦家族
20866	蘇文如家族
20867	蘇春江家族
20868	蘇曉薪家族
20869	蘇柳田家族
20870	蘇森枝家族
20871	蘇淑瑾家族
20872	蘇添愿家族
20873	蘇登求家族
20874	蘇素珍家族
20875	蘇紹文家族
20876	蘇英挺家族
20877	蘇莉家族
20878	蘇貴姿家族
20879	蘇錦倩家族
20880	蘇麵家族
20881	衣復恩家族
20882	袁仲頤家族
20883	袁守謙家族
20884	西山經子家族
20885	許世楷家族
20886	許倪家族
20887	許加家族
20888	許勝發家系
20889	許博允家系
20890	許啓祐家族
20891	許坤元家族
20892	許婉禎家族
20893	許子秋家族
20894	許宏章家族
20895	許振乾家族
20896	許文容家族
20897	許書章家族
20898	許月桂家族
20899	許月英家族
20900	許東湖家族
20901	許淑敏家族
20902	許玉燕家族
20903	許通章家族
20904	許遜頭家族
20905	許那美家族
20906	許餘定家族
20907	許鶴年家族
20908	詹可己家族
20909	詹國家族
20910	詹樣家族
20911	詹湧泉家族
20912	談國芬家族
20913	謝介石家族
20914	謝友彥家族
20915	謝國城家系
20916	謝大文家族
20917	謝妍妍家族
20918	謝成源家族
20919	謝戴慶家族
20920	謝有福家族
20921	謝東閔家系
20922	謝桂英家族
20923	謝武憲家族
20924	謝汝銓家族
20925	謝滿家族
20926	謝灝齡家族
20927	謝然之家族
20928	謝煥邦家族
20929	謝美芬家族
20930	謝美鈴家族
20931	謝肇雪家族
20932	謝豪晃家族
20933	謝隆盛家族
20934	譚乃麗家族
20935	譚安蜜家族
20936	譚文勤家族
20937	譚素容家族
20938	谷蘭皋家族
20939	豐澤浩一家族
20940	貝諾仁家族
20941	費驊家系
20942	賀膺才家族
20943	賈德懷家族
20944	賴其廉家族
20945	賴名湯家族
20946	賴國洲家族
20947	賴崇慶家族
20948	賴文禮家族
20949	賴明秋家族
20950	賴森林家族
20951	賴永祥家族
20952	賴淳彥家族
20953	賴蓮樵家族
20954	賴靜芬家族
20955	趙同和家族
20956	趙大若家族
20957	趙廣緒家族
20958	趙廷箴家族
20959	趙棣華家族
20960	趙洪娉家族
20961	趙清雲家族
20962	趙珊家族
20963	趙申德家族
20964	趙英明家族
20965	趙蘭坤家族
20966	趙鍾麒家族
20967	辛連生家族
20968	辜顯榮家系
20969	連戰家系
20970	連月家族
20971	連柑家族
20972	連華圻家族
20973	連鯤菁家族
20974	邱創煥家族
20975	邱嘉雄家族
20976	邱慶源家族
20977	邱文慶家族
20978	邱秀村家族
20979	邱秀梅家族
20980	邱誠家族
20981	邱阿雄家族
20982	邱魏任家族
20983	邵湘聆家族
20984	郎醒石家族
20985	郭國銓家族
20986	郭天乙家族
20987	郭天恩家族
20988	郭嵩燾家族
20989	郭左淇家族
20990	郭希韞家族
20991	郭廷俊家族
20992	郭德焜家族
20993	郭文璐家族
20994	郭春家族
20995	郭月蘭家族
20996	郭東星家族
20997	郭珍珠家族
20998	郭秀幸家族
20999	郭秀辜家族
21000	郭美錦家族
21001	郭豫倫家族
21002	郭達標家族
21003	郭金塔家族
21004	郭靜萱家族
21005	郭鬱松家族
21006	鄒祖德家族
21007	鄔永揚家族
21008	鄧文岳家族
21009	鄧美苓家族
21010	鄭周敏家族
21011	鄭和枝家族
21012	鄭寧權家族
21013	鄭寵兒家族
21014	鄭昭枝家族
21015	鄭月惠家族
21016	鄭查某家族
21017	鄭極民家族
21018	鄭淑卿家族
21019	鄭添貴家族
21020	鄭瑞麟家族
21021	鄭瑩家族
21022	鄭美笭家族
21023	鄭翩翩家族
21024	鄭興家族
21025	鄭貞文家族
21026	鄭貴蓮家族
21027	鄭錦明家族
21028	鄭雪梨家族
21029	金梅琳家族
21030	金樂琦家族
21031	金石堂周家家系
21032	金竹琴家族
21033	金紫蝶家族
21034	錢慧麗家族
21035	錢致榕家族
21036	鍾任君家族
21037	鍾佩華家族
21038	鍾家騫家族
21039	鍾惠玲家族
21040	鍾鑾嬌家族
21041	鐘慧喜家族
21042	鐘素娥
21043	闕尾娘家族
21044	陳一鶴家族
21045	陳丁聖家族
21046	陳不纏家族
21047	陳中和家族
21048	陳乖家族
21049	陳以明家族
21050	陳俊哲家族
21051	陳保枝家族
21052	陳傳旺家族
21053	陳光博家族
21054	陳冠澄家族
21055	陳印蓮家族
21056	陳哲銘家族
21057	陳啓招家族
21058	陳嘉尚家族
21059	陳國和家族
21060	陳國振家族
21061	陳大蕾家族
21062	陳天來家族
21063	陳奇祿家族
21064	陳娥家族
21065	陳婉如家族
21066	陳媛梅家族
21067	陳宇樑家族
21068	陳守山家系
21069	陳安家族
21070	陳定國家族
21071	陳宿家族
21072	陳寶月家族
21073	陳寶琛家族
21074	陳寶箴家族
21075	陳履安家系
21076	陳常俊家族
21077	陳幼麟家族
21078	陳彥年家族
21079	陳徹家族
21080	陳怡榮家族
21081	陳惠珠家族
21082	陳慶華家族
21083	陳招家族
21084	陳招治家族
21085	陳振能架子
21086	陳政治家族
21087	陳文華家族
21088	陳明珠家族
21089	陳星恆家族
21090	陳昭雄家族
21091	陳月家族
21092	陳望曾家族
21093	陳東彥家族
21094	陳查某家族
21095	陳桂花家族
21096	陳樸一家族
21097	陳樹林家族
21098	陳欽明家族
21099	陳正憲家族
21100	陳武璋家族
21101	陳氏1家族
21102	陳永誠家族
21103	陳淑貞家族
21104	陳溪圳家族
21105	陳滿盈家族
21106	陳澤旭家族
21107	陳火怠家族
21108	陳炘家族
21109	陳炳林家族
21110	陳炳華家族
21111	陳炳郁家族
21112	陳瑞珠-1家族
21113	陳瑞菊家族
21114	陳甜家族
21115	陳由豪家系
21116	陳研子家族
21117	陳碧華家族
21118	陳祖表家族
21119	陳秀娥家族
21120	陳秀鑾家族
21121	陳秋光家族
21122	陳秦家族
21123	陳簪家族
21124	陳美明家族
21125	陳翠娥家族
21126	陳聰美家族
21127	陳肅容家族
21128	陳能通家族
21129	陳興祥家族
21130	陳芳英家族
21131	陳茂麟家族
21132	陳萬富家族
21133	陳藹玲家族
21134	陳詠雪家族
21135	陳諸家族
21136	陳謹-1家族
21137	陳贊治家族
21138	陳逢源家族
21139	陳邦亮家族
21140	陳金英家族
21141	陳錦恆家族
21142	陳長壽家族
21143	陳長玲家族
21144	陳隆志家族
21145	陳雙興家族
21146	陳雪娥家族
21147	陳靜中家族
21148	陳靜敏家族
21149	陳靜文家族
21150	陳靜齋家族
21151	陳鴻鳴家族
21152	陳麗美家族
21153	陶一珊家族
21154	陶天林家族
21155	陶素珍家族
21156	陶至真家族
21157	陸家驊家族
21158	陸小曼家族
21159	雷欣雲家族
21160	雷法章家族
21161	靳文穎家族
21162	韋永成家族
21163	韓子星家族
21164	韓玉梅家族
21165	顏千鶴家族
21166	顏國年家系
21167	顏岫峰家族
21168	顏振聲家族
21169	顏溫溫家族
21170	顏碧霞家族
21171	顏金月家族
21172	顏雲年家系
21173	顧宗瑞家族
21174	顧效禹家族
21175	顧祝同家族
21176	馬佩璋家族
21177	馬偕家族
21178	馬克任家族
21179	馬嘉萬家族
21180	馬尚修家族
21181	馬振榮
21182	馬熙家族
21183	馬積善家族
21184	馬鳳歧家族
21185	馮如聖家族
21186	馮明雄家族
21187	高信家族
21188	高叔哿家族
21189	高政治家族
21190	高桂家族
21191	高湯盤家族
21192	高瑞英家族
21193	高秀燕家族
21194	高萍家族
21195	高賀千智子家族
21196	高雄企行王家家系
21197	高雲霖家族
21198	高靜雅家族
21199	高龍月家族
21200	魏火曜家系
21201	魏玉蘭家族
21202	魏秀玲家族
21203	魏罔家族
21204	魏邦彥家族
21205	魏麗芳家族
21206	鹿港丁家
21207	黃世珍家族
21208	黃中正家族
21209	黃佩蓉家族
21210	黃俐玥家族
21211	黃勇生家族
21212	黃勝美家族
21213	黃友仁家族
21214	黃坤卿家族
21215	黃女娥家族
21216	黃如霜家族
21217	黃嫣紅家族
21218	黃子欽家族
21219	黃子通家族
21220	黃宗仁家族
21221	黃宗堯家族
21222	黃崇仁家系
21223	黃崇西家族
21224	黃循武家族
21225	黃快家族
21226	黃慧琚家族
21227	黃慧環家族
21228	黃成金家族
21229	黃新登家族
21230	黃明富家族
21231	黃昭睿家族
21232	黃朝琴家系
21233	黃榮泰家族
21234	黃樣家族
21235	黃次璇家族
21236	黃正廷家族
21237	黃河家族
21238	黃河濱家族
21239	黃淑女家族
21240	黃淑芬家族
21241	黃演鈔家族
21242	黃炎生家族
21243	黃玉麟家族
21244	黃珧華家族
21245	黃百祿家族
21246	黃碧珠家族
21247	黃秀卿家族
21248	黃秀美家族
21249	黃素珠家族
21250	黃素美-1家族
21251	黃素美家族
21252	黃紡家族
21253	黃紫雲家族
21254	黃綺堂家族
21255	黃美倫家族
21256	黃美英家族
21257	黃美鳳家族
21258	黃翠鶯家族
21259	黃聯登家族
21260	黃謙如家族
21261	黃金岱家族
21262	黃金相家族
21263	黃銀漢家族
21264	黃雪家族
21265	黃顯崇家族
21266	黃麗姿家族
21267	黎純真家族
21268	龔福明家族
21269	龔立帆家族
21270	龔雲環家族
